# Supplementary material for: Global transcriptome profiling and functional analysis reveal that tissue-specific constitutive overexpression of cytochrome P450s confers tolerance to imidacloprid in palm weevils in date palm fields
Source: PubMed Central journal article supplement (PMC6545022; doi:10.1186/s12864-019-5837-4), 2019-05-31
Supplement: 12864_2019_5837_MOESM4_ESM.pdf [file 12864_2019_5837_MOESM4_ESM.pdf]

**Table S2.** *Rhynchophorus ferrugineus* P450s functional annotation and classification.

|                                     | <b><i>R. ferrugineus</i> NCBI<br/>SRA acc. SRX877682</b> | <b><i>R. ferrugineus</i> NCBI<br/>SRA acc. SRA045820</b> |
|-------------------------------------|----------------------------------------------------------|----------------------------------------------------------|
| Total number of reads               | 194,157,678                                              | 631,425                                                  |
| Total length of reads (bp)          | 19,609,925,478                                           | 324,204,057                                              |
| Total number of reads cleaned       | 187,637,734                                              | 624,107                                                  |
| Total length of reads cleaned (bp)  | 18,764,192,058                                           | 288,373,233                                              |
| Number of singletons                | 65,445,353                                               | 169,721                                                  |
| Total length of singletons (bp)     | 6,548,569,140                                            | 74,582,402                                               |
| Average length of singletons (bp)   | 100.06                                                   | 439.44                                                   |
| Largest singleton (bp)              | 102                                                      | 845                                                      |
| Number of contigs                   | 35,667                                                   | 17,508                                                   |
| Total length of contigs (bp)        | 30,576,631                                               | 15,617,534                                               |
| Average length of contigs (bp)      | 857                                                      | 892                                                      |
| Largest contig (bp)                 | 42,221                                                   | 10,464                                                   |
| Average sequencing depth of contigs | 342,021 X                                                | 12,105 X                                                 |
| N50 of contigs (bp)                 | 1557                                                     | 1014                                                     |
| GC content of contigs               | 38%                                                      | 44%                                                      |
