# Supplementary material for: Global transcriptome profiling and functional analysis reveal that tissue-specific constitutive overexpression of cytochrome P450s confers tolerance to imidacloprid in palm weevils in date palm fields
Source: PubMed Central journal article supplement (PMC6545022; doi:10.1186/s12864-019-5837-4), 2019-05-31
Supplement: 12864_2019_5837_MOESM6_ESM.pdf [file 12864_2019_5837_MOESM6_ESM.pdf]

**Table S4.** Toxicity assay of Confidor® 350 SC against susceptible and field-caught adult RPWs over 4 days of exposure.

| <b>Time (day)</b> | <b>RPW strain</b> | <b>LC<sub>50</sub> (mM)</b> | <b>Lower - Upper limits</b> | <b>slop ± SE</b> | <b>r</b> | <b>χ<sup>2</sup> (df=11)</b> | <b>RR</b> |
|-------------------|-------------------|-----------------------------|-----------------------------|------------------|----------|------------------------------|-----------|
| <b>day 1</b>      | susceptible       | 6.30                        | 5.24 – 7.53                 | 5.40 ± 0.68      | 0.96     | 5.17                         | 1.45      |
|                   | field-caught      | 9.11                        | 8.03 – 11.27                | 4.17 ± 0.66      | 0.99     | 2.37                         |           |
| <b>day 2</b>      | susceptible       | 5.66                        | 4.49 – 7.00                 | 5.23 ± 0.66      | 0.94     | 5.92                         | 1.40      |
|                   | field-caught      | 7.92                        | 7.22 – 9.06                 | 4.73 ± 0.66      | 0.99     | 0.42                         |           |
| <b>day 3</b>      | susceptible       | 4.65                        | 4.36 – 4.93                 | 6.21 ± 0.69      | 0.99     | 1.07                         | 1.45      |
|                   | field-caught      | 6.75                        | 6.22 – 7.48                 | 4.37 ± 0.51      | 0.99     | 1.48                         |           |
| <b>day 4</b>      | susceptible       | 3.44                        | 2.76 – 3.81                 | 5.46 ± 0.44      | 0.96     | 7.94                         | 1.73      |
|                   | field-caught      | 5.97                        | 5.53 – 6.50                 | 4.40 ± 0.47      | 0.98     | 2.99                         |           |

*Resistance ratio (RR) = LC<sub>50</sub> of field-caught RPWs/LC<sub>50</sub> of susceptible RPWs*
