# Supplementary material for: Global transcriptome profiling and functional analysis reveal that tissue-specific constitutive overexpression of cytochrome P450s confers tolerance to imidacloprid in palm weevils in date palm fields
Source: PubMed Central journal article supplement (PMC6545022; doi:10.1186/s12864-019-5837-4), 2019-05-31
Supplement: 12864_2019_5837_MOESM7_ESM.pdf [file 12864_2019_5837_MOESM7_ESM.pdf]

**Dataset S1.** P450s identified in this study, FASTA format file (contig name\_CYP name).

> RferU1\_CYP6MS2

TAGACTATATAAGACCTGTATTCATAGACGGTGGGGATAGTTCTTGCGATAGTCAGGCCACGATGTTGTTGTATGT  
AGTCTTGGTGTTAGTTGCTTTCTTGGTTTACGTAAAATTTAAACAATCTTATTGGAAACGCCGAGGTCTACATCAAC  
TGGAACCAGAATTTTTCTTCGGTAACGCTAAGAAGGAAGTCTTGGTAAACGATCAATATTCCTTCTCTCCGAGAT  
ATTTACGAGAAAAGCCAAAGTTCTGAAGCAGGATCACGTCCGAATATACTTCTTCTGGAGCCAATTTACATCCCAA  
CGAAGTTGACCATCATCAAACAGATTTTTGATAAAGGACTTCCAACATTTCTGGGGCCATGGCGGCTTCTCGCATCCC  
AATGAGCGTCTGTCGATGAATCTGTTCAACTTGGAGGGCGATCCTTGGCGACATCTACGCACCAAAGTACCCCCA  
CGTTCACGTCCGGTAAAATGAAGATGATGTTTGATACTTTGGTGTCTAAAACCGACGTTTTGGAGAACTAATCGA  
TGTTACATCACCCGCAAAGAACCGTTGATATAAAGGAAGCTGCAGCTCGGTTTACCACGGATATCATAGCCAGT  
TGCGCGTTCGGTATTGAGACTGATGCCATGGAGAACGACCGGAATGATTTCCGAACATATGGAAGAAAAGTCTTC  
AAACCAACAACGTTTAAATTGTTTCTTAGTAACACTGTACCGGCATCAGTTTTAGGTCCATTGGGTTTTCAAATATT  
CCTCGAGATGTAGACGCATTCTTTCCGAAACTGTGTTGGATACCATGCAATACCGAGAGAAATATAACATAATAC  
GTAAAGATTTTATGCACCTACTGTTACAGCTAAAGAATGGCGATAACAACAAGTCTGCAGACACTCAAAGTTTAA  
TAATGATGAATTAATTGCCAGTAGTTTTATTTTCTTCTTCTGCTGGCTTTGAGACATCCTCAACTACAATCACGTTCC  
CTTTACTGGAATAAGTTCGAACCAGGAAATTCAGGATAAGCTGAGGAAGGAAATCAACGAGTTTTAGATCGAC  
ATGATGGAAAAATAACGTACGACGCCATGATGGAAATGAAATACCTGGACATGGTTCGTAATGAATCGCTAAGGA  
AGTATCCGCCAGTGGCTATCCTTCTCGAGTGTGTAGCAAGAAGTATGAAGTACCTGGGACTAAGGTAACAATCG  
AAAAAGGCACAAAAGTTTCAAGTACCTGTCTGGGGCATAATATGGACCCTGAGTATTATCCCGAACCGGAGAAG  
TTAATCCCGAACACTTCACCCAGAGAACAAGCCAACCGACCAGAGATGGCGTTCCTTCTTTTGGCGAAGGTC  
CCCGAATGTGTATGGACTGATCAGTTTATTGAAGAATTTCAAATTCACGGTGAACAGCAAGACCCATACACCCATC  
CAAATAGAGAAAAGTTAGTTTTGTGTTATCTGTTGAAGGTGACGTTTGGTTGAACGCCTCAAGAGTATAAGTTTTAA  
GGATATTTTTGATTAATAATACGTTATTTTGAATCTATTTTGAAAAAAATAATCCTAAGTAAATCAGATTTTTAATT  
TTTTATTTTGTGTTAATTTTTCATAGATTGTTTCATAGTAGATAGTAGATAAAAAGTTGTATTAGGTCAAGTCATAAT  
ATTTAGAAATATATACTCGTTATCAACTATATGTGATTTGTATTATTTATTTAAACAAACACTCTATGTTTGT  
TAAATTAATTCGTTAATGGTGTATGTGTTATGTAATGTATATTTATTTAATTTTTGTTGTATTAATGTATTTAAA  
TTTATTTATACCTGACAATTTTTAATCCTTCTATCTTTATTTTATGGACCAAAGTAAATAATTTTGTACCCAGAAAA  
ATATATTGAATAAAATATCGACAAA

> RferU5\_CYP6CR10

AAGCAGTGGTATCAACGCAGAGTGGCCATTACGGCCGGGGACTTCGTTCCAATTCACAATCCAAGTAATATTCG  
GCATGCTAATTACATGACCACGCATTTATTACATTATTTTATTATTGTTTAGACATATTGTTTATTAGGGTTGGTTGA  
ATATTTTTAATTATTTGATATAAAGGAATCAAACAGGCAACAATAAGCGACACGTAGAAGAAAAGTCAAACCGACTT  
AACCACTGCGTCAACAAGCAGTATATTAAGATATGGCCTCGTACATCGTCTCCAAGCATGGTATAGGAAGTGGTTA  
TCGCGATGCGGGAGTGATCGCGGAATTGTCATTGTGCTCTGTGCTTTTATACGAACAATGCTGCCGCTATACCTAA  
TAATTTTCTATGTGTGGCAATTGGAATAGTATTTTATTACAAAAGTCTATTCAATTAAGTAAAGAAAGGAGT  
GCCATATTTAAAACCGACATTGCCATTTGGAAATGCCACTAAATCTTTCTTAACCAGCAATGTATAGGAGAAGTCT  
TTATGGATGTTTATCTTCAAATGCGACGTGAGGATGGAAACATGGTGGGATGTTTTTCTGCGGTAAACCGGTATA  
CATCCCGCTGGATAATGAACTTGTTAAAAAGATACTGGTTCCGATTTTATAAACTTCCCTAATCACGGATTGTATA  
TTGACGAATCCGTCGACCCTCTATCGGTACATCTTTCAATATGGAGGGTTACAGGTGGAAGAATGTAAGGGCAA  
AGTTACCTTTGGCATTACGGCAGCTAAAATGAGACGGAACGTTATCATAATGAATGAGACCTGCAAAGAGTTTTT  
GAAAATTATAGATAAATACGAATCTGAAAACAATCAATCAATATTAAGGATGTGCTCACTCGTTTCTCTATAGATG  
TAGTCAGTGCGTGTATATTGGGTATGGAATCCAATACGCTAAAGAATCAAACCCCGAGTTACTTCGAGAAAAGTA

GAGCATTCTTTGACAATCAGTGGAGCAGAGTAAGCAATACTCTGGTTATTCTTATACCTCGACCTGTTTTATCCAAG  
CTGAACTTCAAATTATTCACGAAAAGTGCCACCAATACTTCTTAAACATGTTTAAAATGATTAAAGAACATAGACA  
AACTGAAACTACCAAACGAAATGATTTAACTGATTTACTGCTGGACTTGGCCGATAAGAACAAGTCACATCCCGAT  
TTAATGGGGTTGGTACAATGGAACCTTAACTTTAACGAATTTGCGGCACAATTGTATATTTCTTTCAAGCTGG  
GTTTCGAAACTTCTCGAGTACGCAAGCCTTTGCCCTATACGAACTAGCATCAAATCAAACAATTCAAGATAAACTAA  
GGCTCGAAATTAATGAGGTTTTAAAGAAACACAATGGACAGTTCACATACGATTTCAGTTAACGATATGGATTACTT  
GGGAAGGGTTATAGATGAAACTTTAAGAAAATATCCGATCTTTCCCGTATTACCACGTGCTGCTACTGCTGACTAT  
CAAGTGCCAGGAACCGATGTAATAATAGAGAAAAATTCGTTCTGACTAGTTACTAATTTGGGCGTCCACTATGATC  
CAGAATACTATCCAGATCCGATGAAGTTTGATCCTGATCGATTTACAGCAGAAAATAAAGCGAAGAGGCCCTTATTG  
CTCATATATCCATTTGGGAAGGGCCAAGAATTTGTATAGGAAAACGATTTGGAATATGGCAAAGTAAAATCGG  
TTTGGCTAACATAATCAAGAATAAAYGTGACTTTAAGTAAGAAAATGAAACTACCAGCCAGGTTTCGATACCAGT  
GGATTGATCTTGAAATTACACGGGGATATTTGGGTCGATCTTAAAAGGATTTGTTAAAGTTTTATTTAATAGCTATT  
AATATTTATAAGTGATTATAAAACGAGATAAATATATGTATATGTAGAGTAATTTTTTAAATAAATTTAGCGAGG  
CATTAAAATAGCGTCTTGTTTTACATTAGAATAGATTGAAAACCTCACTATAGTTTTGTATTCACTGTTTCATGAAAT  
CATCAATTCTTCTGTAAAATAAATATTATACTACCCAAAAGAAA

> RferU10\_CYP6BX6

ATTCTTGAATTGTAATATAAGGAACTTAACTGTATTAATCTGCTTATAGTTATTTGAGTAATACCCCTCCTTCCACAG  
TTGGAATGAAATTATTCACCACGTATTTGGGTGGATAAGGCGTGGTCTCGTGCAAAGAGAAATTAAGTCTTTCAA  
TAGCATGGCCAGTCCAAGTTTAGACTCTAACAGAGCGAACCTCAATCCTAAACACTGTCTAGGCCATCACCGAAT  
GGTATGTATGCGTGAGGGTTGATTTTGTGTTTATTCTCAGCACTAAATCTGTCCGGATCGAATTTATACGGATCAG  
GGAAATATTCAGGATCCAAATGTAGACCCAGACAGATATTTTCAAWGTAGTGCCTTTTTCACTATCACCTCCGT  
GTTGGGTACTTTGTARTTCTTCTGTCGAACTCTAGGTAGGATTGCAAGTGGTGGATACATCCTCAGTGTTCCTTCA  
CTACACTTTCAATGTACGTCATCTTGTACAGCTTCATAAGTGAATTTACCACCATGTTTCTTCATAATGCTCTGG  
CCTCTTCTCTATTTTCTGCTGTATATCCGGATGCTGTGTCAGTTCCAATAAACAGAACGAGATTGTGGTGGACGAT  
GTCTCAAATCCGGCAGTGAAGAATAACAAAACCTTGACCAGCGAGTCTTCAAATGATATAACCATCTTCTGCAACAG  
TTTTGTTATAAACATCATCATCGGTACTGTTAATTTCCGTAANTTTTCCCTTATTCTTTAATTGAATCATAAGATGCAT  
AAAGTCTTTTCGCACAATTTTGTGTCCTCTCTATATTTCAAAGTTTCTGTTACCACATTCCTAAAGAAATTCTCCAGA  
TCGAAAAAGAATGTATGGTTTTGTCTGGAAGTAAGAGAAAGGAATTTTGTCTATTTTTGTCCATATGGTTGGCCGT  
TACTAGTGGTACCGAACAGTTTCTGTCCGTGTTTGTAAAATTCCGAGTTTTTATCCGTCAATGAGTTACATTCGATG  
CCGAATCCGCAAGAACCTATGATGTCAGTGGTGAACCTCATGGAAATACCTTTAGTTTCGATCGGTTTGTCCAACCT  
AACTAAATCWGAACTAAAGTCGATAAGATATCAGCTTTTTCTGTTAAAGTGTCAAACATCATCTTCAATTTCCCGT  
TGTA AAAACTGGAGTTAGCTTTCTGTCGCATATTTCTTCCATTCTTCTCTCTCATATGGAACAGGTTATTGAAAAACA  
GCGTCTTCGGTATTTCTGTTAAAGTGGAGATCAAATACTCATAATCCTTCTGTTGATGTTACTTAACTAAAAGTGGAC  
GAACCGGCATCCGAAATCTCTGGATGCGATTGTGCTATTTCTGCCGCACAATGGCCGACGGGAGGGGCTCGCAGC  
TATCCTAGTTCAAGACGATCAATGCCAAAATCGATTCCAGGCCCGGATAAGACCAAGAGCGACCGGCAGTGCCCG  
CGTGATATTCTCAAGAACGGAACGAAGAAGACGCCGCGACCATCTGACAGTCGGTCCGCCGGTCCAAGGTCCGC  
GCATACGTTTTATTTAATATTTGCGATCGCGGTTGGCCAAAATAAACCAGCGCCATTACCCATAAATAAGTGCACGT  
TATTTAGTTGGTGAAGTGGCATCAAGAGAAGACTCATGGGAAAACATCATGAGTTGTTGGTCAATCTGCGACGGA  
GTTTCGCCCAGCAGTCTTGGGGTTTTCAGCCTCGTGGGCGGCGCAGATGTTAAAACCCACGGATAGTCAAGAAGG  
TATCGTTCCGATCGCCGGCGCAGGGCGTACTTCAATGGGTGCACATCATACCAAAGTTGGTAATTACGATCCAG  
AGATATTCCGCATCAGGATGCACAAAATTTATCCGGAACGTTGGCAAACATGCCCTCGTACTCGTACAGATAGAA  
AGTGGACCACGTTATAACACCAGCACTGGCTCTTCCAGAAACAGTTCCCACTACAGTCCCCTCTCGGTATCACCCAA  
TCTATCGCCCAGAGGAGCCCTTTAAGTCCCTCAACAGGATACAGTACCGGGGGTTTCAGCCCTTACCCAGTCTAC

ACACCACTAACCCCGATCGACAATAACTATTTTCGATTCTACGAATACGGTTCGAGGAGAGGGGGTCTGGTCAA  
GGTTACAGCCAAGGTCACTACAGCCAAGGTCAGGATCAGAATGGGGAAATTCACGTTACCAAGCAGCCATATCGT  
ACTACGCCACTGGTACTACCCGGAGCGAAGGTGAAGAAGGAGCCCGGACCAACAGAGAGCTATTTACGTCACCAC  
CCTAACCCAGTGTACGAGCACCCCGCAACATTTAGAACCAAAGGTAGCTCATTCACTTTGGATAGAATATCCAC  
AGGTGACCCAAACAAGCAGCTCGTACACAAACAGTTCAACTCACCGATCAATTTATACAGCGAAAGAAACGTCGT  
AGACTATCCACAGGCAAACCGGCGTCCAGGCCGCGCCAAAGCGAACTGTAAAATTCATCCTGCCGAGAGTGA  
AACTTTCAAGTATCTGCAGGAAGAGGAGCACGGAGGTTACGGAGGACCCGTCCAAGAAGTCAACGTACCTCCACA  
AAGTAAAATATACGCGCCCAAGAAATCAGCCCATGTAGTTAACAAAATAACCCTCAATACTTAAGCGCTATA  
GGCCACGATCCGGAGGTCATCCAACAGAGTGGATCGTTCAAAAGGCTGATGATGTCAGTTCCTCCAGGAAGCAAC  
TATTAAGCAACCTTAATACAGTTAATATTTTCGAAAAACACTGAGAAGTCTGGACAAAGTGCAGCAGTCAATAAAA  
ATCGACGTATATTGCATGTTTTCTTGTCTCTCGAAAACCTGCAACATACGTCAAACATTTACGAAAATTATAAAA  
AGAAAACAATCAATCGACGGATATTTTAAAAATATTCGAAAACAATAATATCCTATTTTTTAAATATCTCTTTCAAAT  
TTGTGTCCATTTTTATACGTAGAGCCATTTGGGAGTCAGAATCCAGTACCATCTATTTAGGTACATAAGTTTGAGGG  
GTATGAAAAAATTAATATAATCTTGTTAATTGATAAGGTAACATAATTAATTGTAATAATACTTTGTTAGGTT  
TTTTAAGGTTTTAAAAACTCGGACAGCCATGACAACGTCAAAGCGGCAACCGTCAAGCGTTGATTGATAAATTG  
ACAGTTCGACGGGCGTCCAAAATTTTTGTTGTGATTTTTAAGTTATTTTTGTTTTGTTTAAATCTTATATTGA  
AATTTTACAAACGAGTGAAATCTAGTCAAATGTGGTTAGTTAGTAAAAGTTAATTTCTATTTAATTCGAATTGA  
AGTAAATACCTTACATTATCATCTTTACGTGGTGTGAGGCAAAGTGCAGGCAACCGTCAAGGTAACACTAAAAA  
TAGCTGTAAAATTTTGTGCGATATAGACCTAGTGTAAAGTTTATTACTATTATTATATAGAGAGAGCTACTT  
AAATTGTTAATTATGTTTAAAGGAAAATAAGGAGTGTTTTTAAAAATGTATTTATTTACTGAAGTTATCTATAAT  
AAAAATAAAGCTATATTTCTTTAAAAAAAAGAAACACAAAAGACAAACATGTCTGCGCCTCTGTACCATGAATAT  
ACCTTGGTCATTGTCAAATATCGCTAGACTGAAGTATGCAATGTTATGATTTGACACACATGTCATTTTATGATACT  
GTAATCAAACGCAAGCTATACAGAAAGATATTATGCGAATAGTAAAACAGATCATGGATTTATACCTCTTTGAA  
AATATCAAGTTTCGTGCCTGAAAACGTGCATTAGCTTAGTACGCACATTTACTTAATCAAAGAAAAAAGCCGCTAA  
AAGCCATCGTTTGTGATACACTTAACTAACCGTAAAACATGTAAGCGTAATCTAAAAAGACCGAATAAAGTCTGA  
AGATGCGAAACCGAAACAATTACAAGATGACAAAACCTAACCCAAACTCAAACAATTGGCAAGAGCATTAAATG  
TGGCCCAAAGAACGATTACCAACCATCTACCATTCCCTGCCATCTCTAAAACCTGCTATAGCTCCAA

> RferU14\_CYP6NS1

TGTTATTAGGAATATTTATTTTTCTTTTAAAAATATCCTATCGGTCTAGAGTGAACAATCGAACAGGATACCTCGTACT  
TTTTAATTCGCCTCATAGAAATAATTTTAAACATCATATCATAAGTACTTTTGTCTTTTGTCTTTTGTGCTGTTTC  
TTTTTTTTCGTTGCTACCAATGTCGTATACGTGATATTTCTTACTGAGTCAATAGAGTGAATCGACGATCCAGTGA  
AANTAATGTTTTATCTTGTGATTTTTGCGGTTCTTGTGCGGCTTTTGTGGTATTTGAAGAGGGCGAATCAGTACTGG  
AAGAGACAGGGAATCTACCAGGCCGAACCGGAATTGTTTTTCGGAACAGTAGGCCAGTCGTCTTGCAAGGTAAA  
CCATACTGTTATGCCTTACTGGAGAGATACCAGCAGTTTAAAAAAGCCAAACTGAGGTATGGAGGTATTTATCTAT  
TCACGATCCCGACACTTATTGTTATCGATCCGGCCCTCATTAAACAAATGNCTTCTNGAAAGACTTCAANCCATTC  
ATGAACAGAGGCTGTACCATACTCCAAAAGATGTTCTCTCCATGAATCTAGTGAACATCGAAGACGAACTATGGA  
GAACTCTTCGCACCAAACCTCACACCAACGTTACCTCCGGTAAAATGAAGATGATGTTGAAACATTGCTAGAAAA  
AACGGTAGGGCTGGAGAGATCTTTCGGGGAATACGCCGATTCTAAGGAGGTCTGTCCGATTAGAGATATCTTGGC  
TCGATTCACGACTGACATCATCGGTAGTTGTGCCTTTGATACCTGGTGGTTGTTGGGAATGTTGAATTATAAAGA  
AGACGGCGTTGAAGTGGCTAATTTCTCAGTAACCTCGTCAAGGACACCATTAGCTACAGAGAAAAAAGCTGGAAT  
GGAAAGGAAAGATTTTATGCATCTCTTGTGGAACCTAAGAACAATGCATCCGGTCAAATACTCACCGAAAATGAG  
ATTATAGCTCAGTGTTACATCTTTTCTTGCAGGATTTCGAGACTTCTCCACAACCTTACCTTCGCTCTGTGCGAAC  
TGGCACAGCACCAAGACATTGAGTCAAACTAAGGGACGAAATCGAGACCACCCTGGCGCAACATGGCGGTAAA

CTTACATACGAAGCCGTCATGAAAATGACTTATCTGGAGAAAGTTATCAATGAAACTCTGAGGAGATATCCACCAG  
TTCCATTAACACAGAGGGTGGCTACATCGAAGTATCATATACCTGGCACTAACCACGTTCTGGATAAGGGTGTGT  
AGTTCAGATCCCTATCTGGGGCCTGCATATGGACCCGAATACTACCCCAATCCAGAAGTATTCAATCCAGAGCAT  
TTTAGTGAAGAAAACAAAGCTTCCAGGCCTGATTTCACTTTTCTACCGTTTGGCGAAGGACCAAGAATGTGTATAG  
GGCTGAGATTCGGTAAACTGCAAACCAAGGTGGGATTAATAAGTCTGATCAGAAAATATAACTTTACTTTGAATGA  
GAAAACCAAATTCCTACTGGAGATGGCACCAAGCGAGATTGTTATGGCGCTGAAAGACGACGTATGGGTAAACG  
TACGAAGGATTTAATAATACTTGCCTGTATTGTAATTCAATTCATATCGAACGATATTTTTATATAAAAATATATGAAA  
TATACAGTGTGCCATCAAAAAAAAAAAAAAAAAAAAAATCTTAAGTTACTCTGCGTTGATTACCACTGCTTAAAAAAA  
AGTAAAAAAA

> RferU15\_CYP6BW20

CAAAGGACAAGAACAATAACGGAACTATTCGTAAACTGACGTAGCGCAGTAATCTGAAATATTACGGTATTACG  
TACCCACCGACTGCAACGGGATGCAGTTTAAACGACACAGCGACTGAAACGGTCGTGAGCGCAATAGCATGTTG  
TTTCTGTTTATAAGTGTATTTTTAGTGTGCGTTTGGCTTTTTTGAATGGCGCAACTCCTACTGGAATCGCCGTGG  
GGTCTTCAAATAGAAGCCAGGCCCTTGTAGTAAAGTGTCTTCGGCGGAAACTATGTTGAAACAATATGCCCGC  
GCCAAAAGCCTGAACCACAAATACGGCGGCACATATTTCTTATACGTACCCGTTTTTATTCCCATCGATCCCATTCTT  
ATCAAGAATATACTGCAACGAGACTTTATACACTTCCATGGACACGGAACCTATCACCAACCGAAAGACGTCTCT  
CCATGAACCTATTTAACTTGGATGGAGAGAGCTGGAAAAGATTGAGAGCCAACTTACACCCACGTTACATCCG  
GTAAAATGAAAATGATGTTTGACACATTATTAGAAAAAACACAGGTCTGAAAGAAGGTGGTTGGTGAATACCGG  
GATTCTGGACAAACCTGCGCTATAAAAGATATTCTTGCGCGATTACAACAGACGTTATAGGAAGCTGTGCCTTCG  
GAATCGAGTGTAACCTATTGGAAGAACCGAACAACGATTTTCGGAAATACGGCAAGAAGGCGTTCGAACCCAACA  
TTCGCAAATCTTGAAAGTGTTCCTCATCCCTCACTGGATATTAGCCAAAACCGTTATAAATTCAGCGGCGAAGAC  
GTGACCGAATTCTTCCACCAACATGGTGAAGAACAATCCGTTATAGAGAGACGAACAATATATACAGGAAAAGAC  
TTTATGCAATTATTATTGGAGATAAGAAACCAAAAAGAAACGACGGACAGTGCCTGACTAGTAACGAAATAATA  
GCCCAGTGTTACGTGTTTTTCTGGCCGGTTTCGAAACATCCTCCACAGCTATCACCTTCGCTCTATTGGAATTAAGT  
CGGAACCTAGATGTTTCAGGAAAAATTGAGACGCGAAATCTTNGCAGGTGTTAATGAGTATAACGGTACGCTCTG  
CTATGAAGCCGTTGGAGATATGAAATATTTAGACATGGTCGTACAAGAGACCTTAAGGAAATTTCCACCAGCGGC  
ATCAATCCCCGAGTGTGCAGCAAGAGGTACAAAGTCCCCGATTGAGTCTAGTCATTGAAAAGGGCGTACGAGT  
TCAAATCCCCGTCTGGGGCCTGCACATGGACCCGGAGTATTACCCGACCCGAGGTGTTCAATCCGAAAATTTT  
AGCGAGGAAAACAGGAACAAGCGCCCGGATTTACGTTCTTGCCGTTTGGCGAAGGTCCACGAATGTGTATCGGT  
ATGAGATTCGGCCTGCTACAACTAAAGTTGGCCTAATCAGCTTAATAAGAAATTTCCACTTTACATTGAACGAGA  
AAACAAAACTCCACTGGAGATGGAACGAGGACAGTATCGTACTCGTCGAAAAGGAGATATATGGTTGAATGTTA  
AGAGAATATGATTGCAACATACCTTCAGTAATTTTTACCAAAGTGTTAATGATATTTAGTTATTTTTAAATAAAACA  
TAGATAAAATACAAAAGAAACAGAACAAGACAAAACATGTCGGCCGCTCGGTCTTAGA

> RferU24\_CYP6BW21

TGACTTTTAGGAAAACGATGAGATGCAAATAACATCGCTGCGTGTTTCTGTGTAATTATATGATAACATAATTTGTA  
TTTAAGTGGTACGGAACCTTCACTTTATAATTTAACAGTTGGTTGTGCTATTAGTCGGTACGAGAGAGTCGTGAGT  
GAGAGAGCGCAATTGTGCGAGATTTTTTTATCGACTCAGTAGTTTTTACGAACAACAGTTAACAATGATTATAC  
CTGTCTTGGCTAGTATTTGTGTACTAATACTGACTATATGGTTCTACATCAAAAATACAATGTCATATTGGTCCAGA  
CGCGGTGTGATACAAATAGAAAACAAACATTTTTGGTCCAGGGAATTTCTTCGGGACAACAATCCGTGATAAGTACC  
AGTACGGTAAATCTTTAAATCAGAAATATATAGGGACCTATATATTGAGTTCGCCAGTCTTTTTCCCATCCATCCAC  
CTTTGATTAACAAACGTAATACAACACGACTTCAGCCATTTCCGCGGTACCGGTAACACTACAACGAACCAAAAGACAT  
CCTCTCGATGCATCTGTTCAATGTTGAGGGCGAGATATGGAAGAAGTTGCGGGTTAAACTGACGCCAACCTTTACA

TC TG GTA AG AT CA AG AT G AT G TT C G AA ACT TT G CT G G A G AA A ACT C A C G G G TT G G A G A A G G T G G T G G G G G AT TA  
T G C T G A C A G G A A G G C G G C T T G C G A T A T T A A G A C G T G T T G G G T C G G T T A C C A C C G A T G T G A T C G G A A G C T G T G C  
T T T T G G T A T C G A G T G C A A C T C T T T G G A A G A G C C G G A T A A C G A T T T C C G A T G C T A T G G G A A G A A G T T T T C G A A C G  
G G C A C C A T C T A G A T T G T T C T A T G T C A T T T T C A T A C C G C A C T G G A T A C T G A T G G C T T C G G A T T T A A G T T T C A C G G C  
A A G G A G G T C A C G G A T T T C T T C A C C A A T C T C G T G A A G A G T A C T C T T A A G T A C C G C C A G G A C A A T A A C A T A G T T C G A A  
A G G A C T T C C T A C A A T T A C T G A T A C A A A T G A T T A T G T A A C T G T G G A C G A G A T C A T C G C A C A A T G C T T T G T A T T C T T C  
C T A G C T G G C T T C G A A A C A T C T T C A A C A G C T A T G A C G T T C G C C C T G T T C G A A C T G G C C A G C A A T C A G C A C A T T C A G A  
A A A G T T A C G A G A G G A A A T C G A G G A G G T C T T G A A G A A A T T C A A T G G A A A C T T A A C T T A T G A C G C T G T G A T T G A A A  
T G A A A T A T C T G G A T A T G G T A G T T A A T G A G A C C T T A A G G A A A T T T C C A C C A G C G G C A T C A A T T C C C C G A G T G T G C A G  
C A A G A G G T A C A A A G T C C C C G A T T C A G A T C T A G T C A T T G A A A A G G G C G T A C G A G T T C A A T C C C C G T C T G G G G C C T  
G C A C A T G G A C C C G G A G T A T T A C C C C G A C C C C G A G G T G T T C A A T C C G G A A A T T T C A G C G A G G A A A A C A G G A A C A A  
G C G C C C G A T T T C A C G T T C T T G C C G T T T G G C G A A G G T C C A C G A A T G T G T A T C G G T A T G A G A T T C G G C C T G C T A C A A  
A C T A A G T T G G C C T A A T C A G C T T A A T A A G A A A T T T C A C T T T A C A T T G A A C G A G A A A C A A A A A C T C C A C T G G A G A  
T G G A A C G A G G C A G T A T C G T A C T C G T C G A A A A G G A G A T A T A T G G T T G A A T G T T A A G A G A A T A T G A T T G C A A C A T A  
C C T T C A G T A A T T T T A C C A A A G T G T T A A T G A T A T T A G T T A T T T T T A A A T A A A C A T A G A T A A A A T A T A A T G T T A T A  
T T T G T A T T G T T A T A T A T T C T T T A A T A T A T A A G A T T G G G G A G

> RferU25\_CYP6NU1

G C A C C A A A A C A C A A A G C A G T G G T A T C A A C G C A G A G T A C T T T T G T C A T G T T T T G T T C T G T T C T T T T A G T G C T A T T A T G  
T C T C G T T G C T T T T T A C G T G A A G T G G C G T T A T A A T T A C T G G A A T A G G C G T G G T C T C C A T C A G C T G A A G C C C C A A T T C C  
C T T T C G G T A A T T T T A A G A G T G A A C T C A T A C G T G A A A A A T C G T T T T T C G A T G G A A A C T T T G A A T T G T A T C A A C G A C T C  
A A A G G C T C C G G T C A C A A G C A C G C T G G A G T T A T C T G T T C C T G G A A C C G G T C T A T C T T C C C G T C G A T T T A T C C A T C A T  
C A A A C G T A T T T T G T T C A A T G A T T T C T C C A T T T T A T G A A C C G T G G C G T C T A C C A T C A T C C A A A G G A T G T G T T G A C T A T  
G A A C T T G T T T A G T A T G G A A G G G A A C A A T G G A G A G C A T T A C G G G C C A A G C T G A C G C C T A C T T T C A C C A G T G G A A A  
A C T G A A A A G T A T G T T T C C A A T A T T A C A G G C T A A T A T C A A A G T T T T G G A T C G A G T T G T T G G T C A T A A C T C C G T T A A C A  
A G A C A C C A G T T G A T A T T A A A G A C G T G G C C T C T A G A C T A A C A A C G G A T A A C A T A G C A A G T T G T G C G T T T G G T C T C G A  
G T G C A A T T C A C T A G A A G A A C A A G A A A A C T C C T T C C G C A C C T A C G G T C G A A A G A T G T T C G A G C C C C A A C C A C T G A A  
G A T G T T C A T G A T C G A G T T C C T T C C C A C T T G G T T A C T T G G C T C T T G G C T T C A A A G C T C A A C G A C C G G A T G T T G A A C  
A T T T C T T C C A C T A C C G T T A A A G A C A C C A T C A A A C T G A G A G A A G A A A C A A C T T A A T G A G A A A T G A T T T C T T A C A G  
T T G C T G C T G G A G A T G A A G A A G G A C C A A A C C T T G A C C G T G G A C G A G A T C A C G G C C C A G T G C A T T A T T T T C T T C T T G G  
G T G G T T T C G A A A C G T C A G C C T C C G C C A T C A C C T T A C T T T G T T G G A A C T G T C A C G A A A T C C A G G T A T C C A A A A C A A  
G G T T A A A C A G G A A A T A T C C G A G A T T T T G A A G G A A T T C A A T G A C G A A A T C A C C T A C G A T T C C C T A A T G A G A A T G A A  
G T A T T T G G A T A T G G T C A T C A A T G A A A C T C T T A G G C T A T A T C C A C C A T T G C C T G T T C T T C C T C G T A T C T G C T C C A A G A C  
C T A C C G G G T A C C G G G A A C T G A A G T G G T C A T C C A G A A A G G A A C C A G A G T A A A C A T T C C C G T C T G G G G C A T T C A C A A  
G G A T C C A G A A T A C T A T C C C G A T C C A G A G A A A T T T A A T C C C G A A A T T T C A C C G A A C A A A A T A A A G C T G A T A G A C C G  
G A T A C A A C T T T C T T A C C A T T C G G G G A A G G A C C C A G A A T G T G C A T A G C T A T G C G A T T C G G A T T A T T A C A A A C T A A A C  
T G G C A A T A G C T A G T T T G C T G A A G A G G T A T A G G T T C A C A T T G A A C G A A A A C A C G C A T A T T C C C A T A A A G A T G A G G A  
A C G A C A C C T T T G T T T T G A T G G C C G A A G A C G A C A T T T G G T T G A A T G T T T G T G A A G A G T A A A C A T G A C A A T T G T T T T C  
G G A A A A G G A A C G G T T C A T T T G G A G A G T A T T A G T T A T C A A T T T C A A C G A A A G C T T T T G T T G A A T A T T T T A A T G T A T T  
A T T T A T G C G T A T T T A T A T A C C G T A N A A T A C A A T T T A T A A T T A A C A T A A A T A A T G G A A G A C A A A A G A C A A A A G A C  
A A A A C A T G T C G G A C C G C C T A C G G T C T

> RferU26\_CYP347E6

AAGCAGTGTATCAACGCAGAGTATTTAGATACGTTGACATAGTAGGACGGTCATGATGTTGATTTTGGTTTTGCTG  
GGTATTATCTTGGCCCTCTTATGGTATCTACGTAGAAATTCTACATGGGATAAGCGAGGAGTTCCTGGTCCAAAAC  
CACTGCCAATCGTTGGGAATATCCTCAGACACTTTTTAGGCCAGAAAACACTTGGACAAATATACCGTCAAATATAT  
AACAAATATGATAAATATCCATTTGTCGGCATCTATAGAGCGACAACGCCTTGCCTACTGGTGCAGATCCAGAAT  
TCGTTCAACGAATTTTGGTGAAAGACTTTAAATCTTTTCAAATAACGAGATGCACGTAGAGAAAGATGTAGATGT  
GTTATTTGGCAGGAATCCTTTCTGTGTTACGAGGGAAGGAATGGAGGGACACAAGGCAGATGTTATCTCCAGGCTA  
TACAAGTGGACGGATGAAGAATTTGTATCCTATGATCACTGAAATAGCAAAGACCATGGTGAATTTTATTGAAAAC  
CACCCAACAGGCACAACCGATGGTATCGAAACTAGGCTTTAACGAAACGTTTTACCCTCGACAACGTGGCTAAAG  
CCGCTTTCCGGTATAGATGGCAAATGTTTCGGAAGCTATGACGAAATGTCCGACTTTATGCAGCTAACTAATACATTT  
CTCCAACAGGATCTTTCCAGGCTATCCTGACCCAAATGATCCAAATATTTCTGTGCATAACAAAATTGCCTTTTCATG  
ACTTTTACTAATAAATCCACGGCGGATAAAAATCATATCGATAATATCGGAAGTAAAAAAGCATCGATTACAAAATA  
ACGTTCAAGCGAATGATTATCTACAGTTTCTGATCGAGCTTGAAAAGAACAACAATTCAGTGACGTAGATGTGAC  
CGCCACGCTAGTACATTCTTTTCGATGGCTATTTACATCTTCCCTAGTTCTGTCTTATCTGCTGCTTTGTCTGGCC  
ATGTATCCAGAATATCAGGATAAAGTGCGGGATGAAATAAAGGAAACATTGGAAAAAATAATGGAGAGATACC  
ATATGAATCGCTACATGACATGCCGTGGTTGAATGCTTGCTTATATGAGTCTACTCGTGTGTACCCCATTTGCTGAAT  
CTATGATGAAAGTTTGTACCGAAGACTTCGAATACCCCCAACAGATCCTAGTTACAAAACTTAACCGTACAAC  
AAAGCCGGGTGATGTGGTCATGGTCCCCTATGGTATTATGAGCAAAGATCCAAAATATTTTGTAGAGCCTGACAA  
GTTTTTACCAGAAAGATTGCTGGAGAAAGATGAAATGTCAAACAAAGTATTCTTTCCATTTGGAGCTGGGCCTCGA  
GTTTGCATAGGTCAAAGGATGGGTATCATGCAAATTAAGCTAGGAGCAGCTCATATTGTGAAGAATTTCCAGATC  
AGTACTAGTCCAAAATATGCCAACCCATTAATATTGCGCATATAATTTTATGAATGAAGTTAAAGGAGGAATAT  
GGTTGAGATATAGAAAATAAATGATCACTAATACTAAAAAATATTTAATACGGATTTATATAATAGTATTTTCTAT  
TATTGTAATCAACGTTATTTAGTTTTAAATTTAAAGTTCATGATTTACTAAATATATTAGATTTTTCTGTAGCAATTGA  
ATAATTTAGCACTG

> RferU28\_CYP6BX5

CGACACATCAACAAGTCATCGCACTGTTGTTTACGGTGGGGCTACATCACGGTAGTCAGCAAATTTCAATTTAAAT  
CGCTACTCATTCCGATACGTTATCTGGTACCTCCGGGACTGTTATTTAAGCGGAATGACAAGTCGGCTCGGACAG  
TCCCAAAATGATTTTAATAATAATAGCGGTGGCGCTCATTGCCGTTTATGTGTACAGCAAATATGATCGCACATA  
CAACTACTGGAACGAAAAGGGGTACCCCAACTGCAACCCGTGTTCTTTTACGGTGACGCGAAGGATTTCTCGAC  
GGGAAAATATGCGAAGCGGAGAATACCATGAACTATTACAAGAAATTCAGGCCAGGGGTCTACGTTTCCGGAGG  
CGTTTATAACGAGAAACGACCGGAGTGGGTACCGTTGACCCGGAACCTCATCAAGACAATCACGACGAAAGACTA  
CGAGTACTTGCACCTCCATTTTAGGAACATCAGAAAAACGCTGTTCTTCAACAACCTGTTTACATGAGAGGCGAT  
GAATGGCGCAACATGAGGAGAAAATTAACCTCCGTTTTTACCACAGGAAAAATGAAGATGATGTTTGATACGTTG  
GCAGATAAGGCTGATGGGCTATCAGTACTGATGCATGACTTGGAGAAAAGACAAAAACCTGTAGAACTTAAGGG  
GATATCGATGAGATATACCACCGATATTATAGGCTCTTGCGGTTTTGGTATCGAATGTAACCTTCAAAGACGAA  
ACTTCGGAATTCTATGTACAAGGCCAAAAATTATTCAACCAGACCAGCGTCAAACCTACCTTGCTCCAAAAAATTGC  
TCGATTCATCAACGTATTACCATCTACCGCACTTTATGCACTTGATGATACAGCTGAAAAATAAGGGAACCATTACC  
GAAATTTCAAACGCAGACGACGATGTCTATGATAAGACAGTTAATGAAGATGGAATCGGATTTGAAGAACTCGCT  
GGTCAGGTTTTGCTGTTCTTACCAGCGGATTTGAGACCTCTACTACAACAATGTCGTTCCGCTTATTGCAACTGA  
CACAGCATCCGGATATCCAGGAGAAAATGCGAGAAGAAGCGAGAAGGATATTCAAAAAATTCGGTGGGAAATTT  
ACGTACGAGGGTGTCAAGAAATGAATTACATCGAATGTGTGGTTAAAGAAACCTTGAGGATGTATCCGCCGTTG  
GCTATACTCCACGAGTCTGCACAAGGAATTACAGGATACCAAATACGGATGTCATCATCGAAAAAGATACGTCGT  
TGAGAATCTCTGTTTGGGGTTTACATACCGATCCGGAGTACTCCCGGAACCGTTGAAGTTCAATCCGGACAGATT  
TAGTCCCGAGAATAAGCATAAGATCAATCCTCATGCCTATATTCCATTTGGCGATGGACCACGCCAATGTTTAGGT

ATGAGATTTGCTCTGTTGGAGTCTAAGCTGGGGTTAGCGGTACTTCTAAAAGACTTCAATTTTTTCATTACATAAGAC  
CACGCCATATCCACCCAAAATACGTGGTCAATAATTATATTCCAACGTGAGAAGGCNGTGTGCTACTGAACGTCAC  
CAAAGTTGATTAGGATAGTGAGCAGTGATTACTATGAAGTCGGAA

> RferU29\_CYP6NR1

ATAATGTTAATAATAGTTTTGGTAGCAGGTGTGACAATCGGGTTTTGTTTCATATTTAATATGGTTGGAGAATTACTG  
GAAACGACGAGGAATTCACGGAATCAAGACGGACTTGCTTTTTGGTAATATCAAGAAATTAATAGTCGGGAAAAA  
GCCCTTCCCGTGTCTGTCTTGGATAGATACAGAACCTAAAAGGATTAAGTTGAAACATGGAGGTATATTCACG  
TATACTAAACCAACTTACATACCAATCGATCCGGTGATCATAAAACACATCTTACAAGCTGACGCGAGACACTTCT  
CAGTAGGGGCTGTATCACACGCCTGCAGACATCCTCAGTATGAATTTGTTAAATTTGGAGGGCGAGAGATGGAA  
ATGTCTTCGAGCCAAATTGTCTCCCACTTTACCTCGGGTAAAATAAAGATCACGCATCAAATTTTTGTTGGAAAAAG  
CCGAGCTGATGGCCGCTGTTGTCGGGAAATCCGTTGATGACGATCAACTTTGTGATATCAAAGATGTCCTGTCACG  
GTACACTATCGATATAATTGGTAACTGCGCGTTTTGGCATCGAAAGTGATTCCTTACAAAATGTTGACGACATCTTCA  
TAAGATACGGGAAGAAAATCTTTGAAAGAAGTCTGACTGAAATTGGTGCTACTTCAAGTTCTGCCTTGGAACCTCTT  
GGCTACCTCGGATACAGATCGGAAGGACGTGATATCAGCCGGTTCTTCTCAATTTCTGTTGCAAGGATGATCGAT  
TACAGGAAGACTAATGCTATATACCGAAAAGACTTTCTTCAACTAATGCTCGACACGAAAATCGATGACCACGGTT  
TAACCTTAGAAGAGATCACGGCTCAGGCATATATTTCTTCACTGCCGTTTTGAAACGTCGTCGAATGCCTTACA  
GTTTGCCTTACTGGAAGTGGCAGGAAATCCGGAATACAGGACAACTGAGGGGTGAAATAGAGGAGTTTTGT  
CGAAGTATCACGGCCAGTTAGTGTATGAAGCTGTTCAAGAGATGGTGTATTTGGATAAAGTTGTGAAAGAAACCT  
TGAGGAAATATCCCGCAACAGCCGCTTACCCAGAGTCTGTACCAAAGACTACAAAATCTGGAACGGGCTTGT  
GATTGAAGAAGGACTTCGCGTTCAAATCCCATTTATGGTATACACATGGATCCAGAGTACTATCCCCAACCCGAG  
CAGTTTAATCCCGAAAATTTAACGAAGAAAATAAAGCAAACGATTGGATTGTAGTTTCTGCCCCTTTGGAGAAG  
GACCTCGAATTTGTATAGGTATGAAATTCGGCCTGTTGCAAGTAAAATTGGATTAGTAACGTTAATAAGACAATT  
CGTATTCGTCTTAAATAACAAGACGATTTTTCTGTGAACGTTAAAGACAGAGGCGGGCTTTTGACGATAAAAAGAA  
GACATTTGGTTTGACATCCGTCGAATATGATTTCCCTTTCCCTTATTATAGACATTATTATTGTTAACAAGTGAAGT  
CAGTTAATAAGTTATTTAGTATTAATAATTGCATTGGAATGTGAATTAATGTGACTGTAT

> RferU31\_CYP6NV1

GGCGGGATATATTGGTCTTTCAGTCCAGAGTTAGTTATCATCGATACTAACTTGATGAAGAATATTATACAAAAGG  
ATTTCAAGTTATTTCCAAGGGCGAGGTTTGTACACGCACAAGAATGATACCCTTTCGCAAATATGTTTCGACTGGT  
GGGTGACCCTTGAAAAAGTTGAGGGTGAAGTTAACCCGACGTTACCTCCAGTAAAATGAAGATGATGTTCCG  
CACCGTCCAGGAGAAAGAGAAGCGTTTTGAACGACGTGATGGAAGAATATGCTGAGGATGGCGGTATCTTTGAGG  
TAAATGACGTCACTCGTCTTTACCAGCGACATCATCGGATCCTGCGGTTTTGGTATCGAATCTGATTCTCTGCAA  
TGCCCTAAGAGTGAATTAAGAGAATATGGAGACAAAGTGAATGATCCTAAATTAAGTACTGAGCATATGGTTAGAATCA  
ACTCTACCCGGGACGATATTGAGCTACACCGGCTACAAATGCTACAAACATGTGTCCAGTTCTACCACAAGGTGG  
TAACGGACACAATAAACTATCGTATTCAGAACAAGGTGATTAGGAATGACTTCATGCATTTGCTGTTGCAACTGCG  
TCAGAAAGGCTTCTCGACGATGAGTCAAARACCGGACAGGAAACCGGTAGAATCACGGACGACGATATCGTCGC  
CCAGTGCTTCTGTTCTTCTGTTGCTGGGATGATACATCTGCCAGTACCCTGTCGTATGCTTTGTATGAGCTGGCAC  
AACACCAAGACATACAGAACAAGATGCGTGAGGAAATTTGCGAGGTAAGTAAAAATACAATAACCAATTGACGT  
ACGATGCCTTGAAGGATCTGTTTACACAGAGAAAGTGTCTGTGAAACTCTGAGGAAGTATCCAGTGGTTCCCA  
CCATCACCCGACGATGCAACCAAGCGTACAAAGTACCCGGAACGATCTCACCATCGAGAAAGGAACTGGGGTTA  
AAATATCAGTTTTTGCCTACAAAGGGATCCAGAGTATTTCCAGATCCAGATAAGTTCCGATCCAGAGCGATTAA  
CGAGGAAGAAAAGGCTAAACGCCCGAATATACTTATTTCCCGTTTGGTGACGGTCCCCGGGTTTTGTATAAGTAA  
CGTTTTGCCATGATGCAAACGAAGGCTGGTCTAGTGGGCTTGTCAAGAACCACAAGTATTCGTTCAAGTACTACAA

CGCCGACAAACCTGAAGTTCAAGAAAGCCATCTTACTTCTGCATACCTCCCATAAAGTACCACTGACCGTTCAGAA  
GATCTCACAGTAAATAATCAACAAAATCAAATGTGTTCAATATAAATTTGAAAATAAAAATTGCTAGACTGAGGT  
TTGGTACAGGATCGAAAAAACAGAACAA

> RferU38\_CYP6DG7

CTGATATCAACAGGATATGTGGTGAACAAAATTAGCCTGTCGTTTATATAAATCTGATACCGTCAGTAGCGGTAG  
ACGTTAAGGCGAATACAGTAAGGGCCACTTTTCAACTCACTCGTCTTCGGACGATTTTATTGCGTGAGACACCGCT  
GTCTCAGTTAAATAAGACGGGAGAAGTGTGCGGAACTAAAATAATACGCTATGAGCTGCCTTTGTTGGGATGTGT  
TGATTGTTCTTGCGGTATATTTTTAGCTGTGTGGCTTTATTTCCAATATTCTTATCAATATTGGGCATCGAAAGGA  
GTACCTTATTTACCGCCAAAATTTCTTATGGAACAATAACAGAATATTCTTAAAAAGCACGGCTTTTGCTAGTGA  
AGCAAAGGATTGGTATGATGCGTTCAAAAAGCAAGGCCACAAATTTGGTGGAGTCTGGTCATTTTCTCGTAAGGT  
TTTGGTACTGGTGGATCCTGAGTACATAAAGGACATTCTCACGAAAGATTTTCAATTTTTCATTGACCGTGATGTAT  
TCTCCAACGAAAAGTACGACCCCAAAGTACTCATTGTTCAATATTTCCGGAATCAGGCTGGAACCGTTGAGACA  
AAAACCTCACGCCGACCTTACCTCTGAAAAAATGAAAATGATGTTTGGCACTGTGTTGGGTTGCGAGTAATTTTCATG  
ATAGATTTTATGAAGAAGTCAACGAGTTCAGGGCTTGATATTGACATCAGAGAAGTTTTAGCGTCTTTTACAACCG  
ATGTTATATCGACAGTTGCGTTCGGAGTGGAAAGCAACAGCTTTGACGATTCCCTAACGATATTCGTCGATATGG  
CAGGACTCTATTCCAGAACTCACTCCGGGACTAGCTCTTCGCGTATTTCTAGGAAGAAGTTTCCCGGAACTTGCA  
AAAAAGTTGGCTACGAAAGGTATGCGTCAAGAAACGCAAGATTTTTTTGAGATGATAGTCAAATCTACCATTGATT  
ACAGAAGNAAAAACAACGTCTCTCGACCTGATTTCTTACAACCTGCTAATGGACATGAATCAAGAACCACAAAACAG  
CGACAAATATGTTAGTTTTGATCAAATCGTAGCAAATACTGTACTATTCTTTATAGCAGGATTTGATACATCATCAA  
CTACAATGACATTTACATTATATGAGTTAGCTCGAAACCAACAATTGCAAGNAAAACTCGGACAGAAATCGTTAA  
AGNTTNNAAAAATATGATGGTCAAATTACATATGATTCTCTTCGCGAAATGGTATATTTGCAACAAGTAGTGGAT  
GAAGCAATGAGGATATGGCCACCGCTAGTTTTCGTTAGGGCGAATATGCACCAAAGATTACATCTCTACCCTCGGTA  
TTGGGAGAGATCCTCGAATATTTCCAGACCCAGAAAAATTCGATCCTCGGAAAGATTGAGTTCGCTGAAAATAA  
AGCTAAACTTCATCCCTATTCGTTTCATCTTCTTTTGGTGAAGGTCCAAGAAATTGCATAGGTTTACGATTTGGTCTG  
ATGCAGTCTAAGATTGGCATTATACGTATTCTAACGAATTTTCGTTTAAACAATCAGTCAGTCTAAGACCAAAATGCC  
TTTAAACGGTAGATCCGATTGTTTCTCCGTTTGAATCAAACGAAACTGCCTTTATTTATAGAGCTGAAAACTGTA  
AAAATAGTAAACTATTTACATTATTTATTGGATGATTTGCAATAGATTATTTAATACAANACTATTTAACAGATATT  
TATTTAAATATATTTTCAATATTATAAATATAAATATTATATTTAATATGAAAATAATTTAAATATATTTTAAATATTAT  
AAATATAAATATTATATTAATATGAAAATATAATTATAAATATTATTTAATATTTTAAATATAATTAATATATTTTAAAT  
ATATATTTAAATATACCAAAGGATATATAGGATTTATATGTTTACTTTTTTAGTATCCAAATTTTCATTAATGCATC  
CTAAAACCTTCTAATATTTAT

> RferU39\_CYP6DG2

CAAAATCATTAGAAATAGATTCTCGATTGAATTTAATCATATTTTTTCAGTACGAAATTATATTATCGTTTCTATTTAC  
CGTCGAAGCTGCTTGAAAACTATTGAAGAAGGTTACTCGAATACGGCCGTAGATAATTCGTTTACCAGTAAGTTG  
CACACAATGGAGCTTAGTGTCTTGATGTTTTGTTATTTATCGTTGCTACAATTGTAACGATTTGGTTTTATTTTCAA  
TATTCGTACGGATATTGGAATAAGAGACAAGTGCCTATTTGAAACCAGTTTTCCCATACGGTAACAGCACAACTT  
TATTACAAAAGGATAGTCTCCCAGCGGGGGAGGTTTAACTGGTACAATGAATTAATAAATAAAGGTCACCAAT  
TTGGTGGTGTGTGGTCATTCTCACGACCAGTTTTTGTGTTCTCGATCCAGAATACATAAAAGACATACTGACCAAA  
GATTTCCAACATTTTGTCAATAGAGAAATCTACTGCAACGAGAAACACGATCCACTCGGCACGAACCTGTTCAATA  
TCGAGGAACAGAGCTGGAAGCTGCTAAGACAGAACTGACCCCACTTTTACATCTGGTAAAATGAAGATGATGT  
TCAAGAGCATAGTAGATTGTAGCGATAACATGATTAATTCCTGGAGAAAAATCTGACGCAGACGAGGATATTG  
ATATCAGAGAGGTGTTAGCTTCTTTCACGTCAGACGTAATTGGAATGTAGCATTCCGGAGTCGAGAGCAACAGCTT



CGACGATTCCAAAAACGATATAAGAAAATACGGAAAGGAAATATTCGAAACGTTTGATTTGTTACTTTTATTACGT  
ATCGCTGCACAACGAATATGTCCAAACATTTTCGAAGAAGCTAGGAATAAAGAGCATGCCGGATAGGATGATCGAG  
TTTTCTCAAATCTGGTCAAACCACTATGGAGTACCGTACGAAAAACAACATCACCAGGCCGATTTCTTACAAC  
GCTGATCGATATGCACCAAGAAGGTGAAACTAGTGAAAAGTATGTAACTTTGATCAGATAGTTGCCAATACTCTG  
CTGTTTTTATAGCTGGTTTTGATACATCATCAACGACGATGACGTTTACTTTATACGAGTTGGCCCGCTGTCCAGA  
TATACAGGAAAAAACTCGACAAGAAATCCAAAAAGTTCTCAGCAAACACGAAAACAAACTGACTTACGAAGCTCTT  
CAGGAAATGACTTATTTGCAGCAGGTTGTAGACGAGGCCATGAGAATTTGGCCTCCTTTGATTACCTTAGGTAGAA  
TATGCACCCGCGATTATAGACTAAGGGATTCTGATATCGTTATCGAGAAAGGTAAGTCTCTGTAGTGATTTCCACTTTA  
GGCTTAGGACGCGATCCTCGATATTATGCAGATCCAGAGAAATTCGACCCTGAACGATTTAGCAGTGAAGAAAAG  
AATAAGAGACATCCCTATATACATATACCTTTTCGGAGAAGGCCACGCAACTGCATTGGTCTGCGATTTGGTCTTAT  
GCAGTCCAAAATTGGCATCATACGTATTTGACTAATTTCCGTATTCATATTAGTACTAAAACAAAAATGCCACTGA  
CAGTCGATCCGTCAATTTTCTGTTGAAGTCTAACGAAACCCTGACTTAAAAGCCGAAAAAATGTGAACGGGAAA  
AACAAATTTTATAGCCCAGCATTAACTACATTAGATTAATGATCACAATAATTAGCTTTGAATGCATGCTAGATT  
AAACATGAATAAGCGTTTTTTTTTTGTTTTGTAATAACCACTGATAACAAAAGTAAGTGTTTTAAATATAAGCGGAAT  
AACGACAACACTATTTGTAATCTTATATAAACTTATATAGTTTGCAATATATGTTTTGACTAAAAAAAACAAAAAA  
AAACAAA

> RferU41\_CYP6BW18

TGTAGAATTAACGAATTTTTTTTTTCAGGGCCATTACAAAGGTTAAGTTATAAAAAGCGTGCGCAATTTTTTGGTTA  
AAGAAATCATCAAATAATCAAACAAATAACGAAATCATACACATGGAGTTAGTTTATTTTGATAATACTAAGATAA  
TATATTAATAGATATTTTGCCTGTATACTTGTTCCTGCATAGGCTTGTGTTGATGGAGTACTAGTAGCGGTTGTG  
TGTGTGATATTCAGTGATAATGTTGTTATATGTAGTGTGGCGTTGGTTCGCCTTCATACTCTACGTTAAATATAAAC  
AATCTTACTGGAAACGCCGGGTTTATATCAATTCGAGCCTGATTTTTTTGTTGGTAATGGTAAGAACGAGATATT  
GGGGAGGCGATCGATTTTCTTCTTCCGCGATATTTACGAGAAGGCCAGAGCTCTGAAACAGGATCATGTTGG  
AATATATTTCTTCTGGAGCCACTGTACATTCCACAAACCTGAACATCATCAAGCAGATTATGATTAAGGATTTCC  
CGTATTTCCAGGGACACGGAGGATTCGCTCACCCCAATGATCGTCTGTCGATGAATCTTTTCAACCTGGAGGGTGA  
ACTTTGGCGAAATCTTCGAACCAAACTGACCCCCACGTTACAGTCCGGTAAGATGATGTTTGAGACTTTGGTATCG  
AAAACCGACGGTTTGGAGAAACTTATCGATGGTTACATCACCCGCAAGGAACCGGTTGATATAAAAGAAGCCGCG  
GCTCGGTTTACCACCGATATTATCGCCAGTTGCGCGTTTGGTATAGAGAGCGATGCCTTACACAACGACAAGAACG  
ATTTCCGGGAATTCGAAAGAAAGTGTCAAACCGAACCCGCTAGTTTTGTTCTCGCCAGTACTGTACCGGCATA  
CATCCTAGGACCGTTGGGTTTTAGGTTTATCGCTCAGGATGTGGAGGAGTTCTTTATAGAAACCGTGATGAATACC  
ATCCAATATCGAGAGAAAAATAAATAGTACGTAAGGATTTTCATGCATCTACTGTTGAGTTGAGGAACACCGAA  
GGCAACAAGGCAACAGACGCTCAGACTTTGACCGACGATGAATTAATAGCGCAATGTTTCGTTTTCTTCTGGCCG  
GGTTTCGAGACATCCTCAACCACCATCACGTTCACTCTATTGGAAGTGGGTTTGAATCAAGATATTCAGGATAAGTT  
GAGGGCGGAAATCAACGATGTCCTGGATCAACATGATGGTCGATCACGATGAAGCCATGATGGAAATGAAATA  
CTTGGATATGGTTATAAATGAAACGCTAAGGAAGCATCCACCAGCAGCAAGCATATCTCGTGTTCGAGCAAAAA  
GTATGAGGTTCTGGGACTGGAGTAACGATTGAAAAGGGCACAAAAGTTCAAATTTCCGCTCTGGGGCATAACAT  
GGATCCCGAATATTATCCCGAACCGGACAAGTTCAATCCCGAAAATTTTCAGTGTGGAAAATAAAGCCAAACGACC  
AGAGATGGCGTTCACTTCTTTCGGGGAAGGTCCACGCATGTGTATAGGTTCTCGTTTTGGAGTGATGCAAACATAA  
ATAGGACTGATCAGCTTGCTGAAGAACTTCAAATTTACGGTGAATGAGAAAACACGCACACCTATTCAGATGGAG  
AAAGTTAGTTTTGTTCTGTCTGTAGAAGGAGATGTCTGGTTGAACGCTTCAAGAGTATAACATAATTCATATATTT  
GGTATTTCTTATTACTGT

> RferU42\_CYP6BW19

CAGTGGGTGCTTGATAAATAATGATGACCTCGATATATATAATTATATCGATACTAGTGTTGATTCTGTGCTATTTA  
AGATGGAAATTTACTTATTGGCAGAGGACGCGGGGTAAAACAGGTGACCGAACAAATTCATTTTTAGTAAAAAATC  
ATTAGGAGAGTCTATTTAATCCGATACAAGCAGGGCAAAGCAATGAAAGTCAAATATCTAGGGGCTTACTTGTTT  
CACGTGCCAGCTTGCTACCCATCGATCCCGGCTTGATCAAGGATATCATGATAAGAGATTTTGCATTTTCCAAG  
GGCACGGTACGTACCACGAACCCAGAGATATCCTCACGATGAACTTGTTGAGTTTGGAGGGTAAAATTGGAGGC  
ATTTACGAGCCAAACTTACCCTACGTTACCTCCGGTAAAATGAAGATGATGTTGAGACATTGGTGGAGAAAA  
AGGGGGTTTGGAGAAAGTGGTCGGTATGTACGCTGATTCGGGAAAGAGTTGCGCCATTAAGATATCTTGGGTA  
GGTTTACGACAGACATCATTGGAAGCTGCGCCTTCGGCATCGAATGCAACTCGCTGGAAGATCCGGAGACGGAGT  
TCCGAGTGTGGGAAAAAGGTGTTTAGATTTAACGCACTGAATTTTCGTCATATACTGGTGTTCCTCGCTGGTTT  
CTCGGCAGTATAGGGTTTAAATTTAATGGGCATGATGTCACAGATTTTTTACGAAAGTGGTGTGCGATACCATCA  
GCCACAGGGAGAAGAACGAAGTGGCCAGAAACGATTTTATGCATTTACTGCTTGAAGTAAAAACAAAGATCGGT  
CTGTGACCGTAAATGAAATTATTGCGCAATGTTTTGTATTCTTCTCGCTGGATTGAGACCTCCTCAACGGCCATG  
ACGTTTGCCTGTTTTGCCTCAGCCAAAATCAAAGTCCAAACAGAACTTAGAGATGAGATTAATGAAGTTTTGCA  
GAAGCAGACGGAAACATCAGCTACGAAGCTGTCAAGGAGATGAAGTACTTGGATATGGTTGTTAACGAGACATT  
AAGGATATATCCGCCGCTCCGGGAATTCCAGAGTTTGCAGCAAGGATTACCGGATCCCGGAACGGATTTGGT  
GATCGAAAAGGGCACGCGCCTTCAAATCCCGTCTGGGGCTGCACATGGATCCTGACTATTATCCCAATCCGGAA  
GTATTCAATCCCGAGAATTTAACGAGGAAAACAAAGCCAAACGCCACGAGTTTACCTTTTTACCTTTCGGCGAAG  
GTCCAGGATGTGCATAGGTCTGCGTTTTGGGCTGATGCAAAACAAAAGTGGGATTGATTAGTCTCATTAAAAATTT  
CCGTTTTACCCTCAACGAAAAGACCAAACTCCCGTGGAGATGGAAAGAGGTAGTATCGTGCTGTGGTGAAAGG  
TGACGTATGGCTGGACGTTCAACGGATTTGAGACAATGCTCATTATTCTTGTATTATAAAATTCATATATTAATA  
AACGTAACACGAAACAAAAA

> RferU47\_CYP6fra2

GGATGATCTCATGCTTACCCGATGTTTAGGATTTCTGTTTTATGTTGCGGCCCTAGTGGTTGTCACATTTTTCTGTAT  
ATTTTTATATTTAAATTTCTTTTACCATTGGTACAGAAGAGGAGTCCGTACATTAAACCTAAAGTTCCTTTTGG  
TAATAATAATAGCTTTGGAAGTGGTGCATTTTCTTATGGGATCGAAAGCTTAGACTGGTACAGGGAAATTAAGAAG  
AGAGGTCTGAAGTATGGAGGAGCGTGGAGTTGGGATAATCCCCTGTTAGTCATCGTTGACCCTGAATATATCAAA  
ACAATTTTGGTAAAGGACTTTGACCATTTCACTGACCGTCATTTTTTACAATCCGAAATACGACCCCAAAAATGAG  
AGTCTCTTTGTGGTGGAGAAAGACGAGTGGAAATATATGAGACAAAACCTTGAAGTCCACTTTTACTCCAGTCAAAA  
TGAAAACCATGTTTCGAGGGCGTTAAGAGGTGCACGGTACCATTAATTCAGTGTGGAGGAATCGGTCAAAAATG  
GAGAAATCATCGACATAAAAGACGTTATGTCGGCTTATACTATAGACGTGATAGGAGCTAACATCTATGGACTTCA  
GTTGGAAAGTTTCAAGGCTAAGGACTCGAAGTTTCGCGAAATTGGCCGAGAAGTTTTNCAACATAACCTGGATGA  
AAGGGATCAAAGTATTTTTCCGCATGTATGAAAAAATTGCTCGAAATCTAGGCATCACCATATTGTCCAGAGA  
CATCATTATGTCTTCGACCAGATCGTCAAGGATACTGTTGAATACAGGAGAAAACGAAGTCAAATATCAAGATTT  
ATGCAGTTGTCGATGGATTTGCATGATTCAACAAAGGACAAAGACAGACCGTATACATTGATCATTAGTTTCCA  
ATATAATTGTTTTCTTGGCTGGTTTTGATACTCAGCCACTACCTTATCGTTCTGTTTATATCATTGGCAATGAATC  
CGGAGATTCAAGAAAACCTCGTAATGAAATCATGATACTTTGAAAGCATGTAATGGTGACTTGACATTCGAGGCT  
ATGAAAAATTTAGACGTATCTTAGGCAAATATTAGATGAAACTCTCCGATTATACCCACCAATAAATGCTTTGTCTC  
GTGTAACGTAAAATCGTATAAAC

> RferU55\_CYP6fra1

ATGGTAGTAATTCGAAGTTTTCCATCTTTGGCTCGACTATTGGGTTTTGGAGTTTTCCAGATAATGTTACGAGTTTTT  
TCGAGGGTGGTTAAAGAGACCATAGAGTATCGAGAGAAGAACAACGTTGAAAGGAAGGATTTTCATGCAGCTGTT  
AGTGCGTTAAAAAGGAATGGATCTCTGGAAGCTGGATCGAATTTAAATGAAATGAGTCAGATCTAGGCAAAGC

GTAAACAATGGACGAAGCTGCCGCCAAGCCTTTATCTTCTTCTGGCTGGCTTCGAAACAACGTCCACCACCACCA  
GCTACTCTTTATTCGAAATGGCTAAGAATTCGGCTATTCAAAAGAGAGTCCGAGATGAAATATTAACAACCCTGAA  
GAAATACGACGGGAAACTGACTTACGACGGGTTGATGGAGCTGAAATATTTGGACCAGGTGATTGGAGAACTC  
TACGGAAGTACCCACCGGCCAGTGTCTTACGCGTGTGTACCGAGCGTTATACAGTACCGGGTACCAAACTACC  
ATCGAGAAAGGCCAGACCGTTCTCATTCTTGCCTCGGTCTGCAAAGAGATCCTGAATATTTTCTGATCCGGAGA  
CATTTGATCCTGAACGTTTCAGTGATGATAACAAGGGAGATAGTCGATTGGTACTTATATCCCATTCCGAGCGGGC  
CTCGAATTGTATTGGTGTCTGATTTGTATGTGT

> RferU59\_CYP6fra4

AATCTACATATATAATATATAATAAAGTGGATTTACACCAGTTTTAGTAGTGTAGCAAAATGTTTCTGATACTA  
GTGGCCGTACGCTTCTTGGCGCTTATATTTACACCAAATATGACAAAACCTACAATTACTGGAAAAGGAAGGGTG  
TAGTGCAACTTAATCCCGTCTTTCTATATGGAGATGCCAAGCCTTTCTTGATGGACAAATATGTGAAGCTGAAAAC  
GCCATGTCTTACTATCGAAAATCAAAGCTATGGGTGTACGATTTGGAGGAGTGATTTCAGAAAACCGACCAGAAT  
GGGTACCGGTGACCCCGAGCTAATAAAAAACAATAACAACGAAGGATTATGAGTATTTTGTCTCCACTTAAACGA  
AATACCGAAGACGCTGTTTTCAATAACCTGTTCCATATGAGAGGAGAAGAATGGAAGAATATGCGACGAAAAGCT  
AACTCCAGTTTTTACAACGGG

> RferC1312\_CYP6NT1

AAGTAGAAGCCTTTCCAAACTTAAAAAATGAATTCTACTCTAGTTTTACAATATTTATTAACCTATAGTGGGTTGATT  
TTATTGCTTGTCTATCGGGGATCTATTTATATTTTCAATTTTCTTTCACCTATTGGAAAAGGAAGGGATTTTCTTATA  
TAAAACCCAAATTTCTCTAGGAAACAATAACTGTATTGGCTTAGGTGCATTTTCTTATGGAATCGAAACATTGGAT  
TGGTATAGGCAGTTGAAAGAAAGAGTTTTGAAATTTGGAGGAGCTTGGAACTGGGCCAATCCGGTGTGGTTATC  
TCTGATCCAGAGTATGTCAAAGATATACTGGTCAAGGATTTCTCCTATTTTACCGATCGAGATTTCTTCCATAATCCC  
ATTGACGACCCAAAGAATGAGAACTTGTGGTTGTGGAGAAAGACGAGTGGAGATACATGAGGCAACACTTGTGCG  
CATACTTACCTCTGCTAAAATGAAGATGATGTGCCCTGGAGTGCTGAAATGTACCGAACCTTGTGGATTATAT  
GAACCAGTGCGCCGCATGTGGGAAAGATATTGACGCTAAGGATATCATGTCAGCTTATACGATCGATGTCATTGG  
TTCAAACATATTTGGGCTGGAACCTGGGTACTTTCAAAGCTGAAGACTCTAAGTTCCGAGAGATTGGTGTGAAATA  
TTCCGCATCAGTGTATGAAAGGTGTTAAGACTATAATGACGAGAGTTTCCGAAGGCCTTGTGCGAACTATGGGG  
ATATCGATTCTACCAGGAGACATAACTGACGCTTTTTCCGAAATAGTTAAAGATACCATCGATTATAGGATAAATA  
ATAATATTAACGACAAGATTTTATGCAAATGGTTATCGATTATACATGGAACTAAAAACAGCGAGAGACAATT  
TACTTTAAATCACCTGATAGCTAACGTGATCGTGTCTTTATAGCTGGTTTTGACACATCCGCTACGACACTTCATT  
CGCCTTATACGAGCTGGCGCTTCATCAGAATCTCCAAGACAAAGCCCCGAGAAGAAATTGATAGAATCTTGAAAAA  
ATATAATGGTGACCTAACATACGAAGCAGTACAAGAAATGACCTATATCAGGCAGATATTAGATGAAACTTTGAG  
ACTATATCCACCGTTAAATGTTGTTGCACGTGTAGCAGTTAAACCATATAAACTAAAAAATACCGATTTATGGTTAG  
AGAAAGGTAGTAGGGTGGTTATACCAGTCATCGGGTTTCAGAAAGATCCTGAATATTTTCTGAACCAGAGCGTTT  
CGATCCAGAACGATTTTTCAGCAGAAAACAAAAGTATTTCCTTCATATGTCTACCTACCTTTCCGGTGAAGGTCCAA  
GGATTTGTATAGGAATGCGATTTGGCAGAATGCAGAGCGCAATTGGTTAATTCAAATCTTGAAGAACTTTAAAT  
CACGTTGAGTCTTTAACACAAACGCCATCAAGCCAAAACGGGGCGTATTTATTATGTTGCCCGATGATAGGATT  
TATATTAAGGCTGAAAAGATATAACAATAATAAGTAATATAATGTAATCAGATAAGTTATAATTAGTTACAGTG  
TTTTATAATAATAGTACTAACATGAACTCGATGTGGTTCGCTTCTTATTATTAATCTGCAGGGGGTCTGTTCTGTTAAT  
TATCAAATATCTCTTAAGAAATGCTAAATAATAATATGGTCTAATAAGTAATTTGAATTTTACTTACCAAATCTAAAT  
TAAGAGATTGGACCTAAATGGTTACCAAGTACATCATAATGTGATTAGCAAAGCGTGTGTTACGGGGCACTAAAT  
GAGTAATCTACGCTCAGCATAGAGCGTAGAACATGGGGCGGCATAATATATATTGCACATGGGTGTAGAAACAAC  
TCAAATCAGCGTCTGGGTGTTTTCTGCCG

> RferC18161\_CYP6fra10

GTATGACATTTTCAAGGAACGAGGAGTCAGATATGGCGGGATATATTGGTCTTTCAGTCCAGAGTTAGTTATCATC  
GATACTAAGTGGATGAAGAATATTATACAAAAGGATTTTCAGTTATTTCCAAGGGCGAGGTTTGTACACAAGCCACA  
ACACGTAACCTCATGAAAAAATCTATTTGAAAAATGTTTTAAATGTCAATTAACATAATTTCAAAAACTTAAACCGT  
T

> RferC18261\_CYP6BW17

GTATAATCGAGAGAAAATGTTGTTTTACGCGGTTGTTGTATTAGTTGCCTTCTTGTGGTTTGCTAGGCGTCGACAA  
AGTTACTGGAAACGAAGAAATCTGTATCAGATCGAACCGCAATTTATATTGGGGAATGCCAGGAGAGAGCTGATG  
GGTAAGCGCTCGTTGCTGGTAATGTTTCGGGACATTTACGAGCAGGCCAGGGCTTTAAAACAGAAGCATGTCCGGG  
ATATACTTCTTCTTGAACCTGTTTACGTACCGACGGATCCAACCATCGTCAAACACATTATGGTGAAGGATTTCTC  
ACACTTCATAGGACACGGTGGGTTTCGCTCATCTAGTGACCGTCTGTCCATGCACCTGTTTAGTATGGAGGGTGAA  
CCCTGGAACTTCTTGAACGAACTCACTCCACGTTTACCAGCGTTAAGATGAAGATGATGTTTGAGACGTTGT  
CGGCTAAGACGGAGGGTCTGGAGACTTTGGTTCGACAACACTACATCGTTTCGAGGGGAACCCATTGACGTCAAAGAC  
ATAACATCAAGATTCACGACCGATATCATCGCCAGCTGTGCTTTTGGTATCGAGAATGATGCCATGGGCGAGGATA  
AAAATCTCTCCGCCACTACGGACGAAGAGCAGTCAAACCTCAATACCTTACGACTATTCCTAACAAACACTGTACCA  
TCTTCAGTACTGGGACAACACTAGGCTTCAAAGTAACGACCATGACATCGACCAATTCTTCTCCAATACCATTATGGA  
TACCATAAAATATCGGGAAAGGTTCAACGTATTCAGAAAGGATTTTCATGGACCTGTTACTTCAAATGAAACGCGGT  
GAAGGGAAATCAAATACCGAACGTTTGACCGAGGATGAAATTATCGGACAATGTTTTATTTCTTCTTGGCTGGTT  
TTGAGACATCGTCGACCACCATGACCTTTGCTTTATTGGAGCTTAGTTTACATGAGGATATTCAGGACAGGTTGAG  
GACGGAGATTCTGGAGGTCCACGAACAACATGGGGGAGTGCTGACGTATGAGGCCCTGATGGAGATGAAGTACT  
TAGATATGGTGATAAATGAAACGTTACGAAAATATCCACCAATAGCAAGTATCCCTCGCGTTTGTAGCAAGAATTA  
CAAAGTACCGGGAACCGACGTAACCATCGAAAAAGGCACTAAGGTTCAAATACCCGCTCGGGGCATACACATGGA  
CCCGGAATACTACCCGAATCCGGAGATATTCGATCCAGAAAATTTCAATAAGGAAAACAAAGCCACAAGACCCGGA  
TATGACCTTCTTACCATTTGGAGAGGGGCCCAGAATGTGTATAGGTCTTCGTTTTGGTATGATGCAGACGAAAATT  
GGCCTAGTCAGTTTACTGAAAAAGTTCAAGTTCACCGTAAATGACAAGACCCAAGTACCAATCCAATCGAGAAA  
GTCAGTTTTGTGTTGTCTGTGGAGGGCGATGTCTGGCTCAACGCTTCCAGATTATAGATTAACAC

> RferC18569\_CYP6fra5

AGAATGATGCCTTGAGCGACGATGAAAATATTTCCGAAAATACGGCAGGAAAATGTTTAGACCCAGCACTTTCTA  
CATGTTGATCTTCAATACCGTCCCATCGTGGATCTTAGGACCAATCGGTTTTCAAATTCGCTCCTCCGGAACCTGGACA  
AATTTCTCACAGATACCATGTTGGACACGATTCAGTATAGAAATAAAAACAACATTCACCGTAAGGATTTTCATGAA  
TTTACTCTTGAACCTCAAGAGTGGTGAGAATAACGGCGATATCTCTCAGAAAGTGTCGAGAAAATTGACTGAAGA  
CGAAATTCTGGCTCAGTGTTTTGGGTTCTTCATAGCCGGGTACGAGACGTCATCAACCACAATCACCTTTGCTCTGT  
TAGAGTTGGC

> RferC21894\_CYP6fra6

GTGCCTCTTTTGTATCAGTATCTCAATAGTAATACTAATACTACATGGTTCTACGTTAAACGCACTTTACAATACTGGAC  
AAAACGGGGCGTGATCCAAGTAGAAAACAAACCCTTCTGGTCCAGGGAATTCTTCGGAACGGCGATTTCGTGACAA  
GTATCAGTATGGTAAATCATTAAAGCAAAAATACGTGCGCACCTATATGTTCAACTCGCCCTCCTTCATCCCCATCC  
ATCCACCCTTGTCAAAGCATAATGCAACACGATTTTCAGCCATTTCCGTGGTACGCGCAACTACCATCATCCAGAT  
CGGAAGAGCGTCGCGTTGAAGGCGAGATTTGGAAAACTTGCGGGTTAAACTGACGCCAATTTTCACATCTGGCA  
AAATCAAGATGATGTTTCGAAACGTTGCTGGAGAAGACTCGCGGACTGGAGAAGGTGGCGGGGG

> RferC21995\_CYP6CR11

ATTTTATAAACTCCCTAATCACGGATTGTATATTGACGAATCCGTCGACCCTCTATCGGTACATCTTTTCAATATGG  
AGGGTTACAGGTGGAAGAATGTAAGGGCAAAGTTACCTTTGGCATTACGGCAGCTAAAATGAGACGGAACGTT  
ATCATAATGAATGAGACCTGCAAAGAGTTTTTAAAAATTATAGATAAATACGAATCTGAAAACAAATCAATCAATA  
TTAAGGATGTGCTCACTCGGTCAAGTGCCTGTATATTGGGTATGGAATCCAATACGCTAAAGAATCAAACCCCGA  
GTTACTTCGAGAAAAGTAGAGCATTCTTTGACAATCAGTGGAGCAGAGTAAGCAATACTCTGGTTATTCTTATACCT  
CGACCTGTTTTATCCAAGCTGAACTTCAAATTATTCACGAAAAGTGCCACCAAATACTTCTTAAACATGTTTAAAAT  
GATTAAGAACATAGACAACTGAACTACCAAACGAAATGATTTAACTGATTTACTGCTGGACTTGGCCGATAAG  
AACAAGTCACATCCCGATTTTAATGGGGTTGGTACAATGGAACCATTAACTTTAACGAATTTGCGGCACAATTGT  
ATATTTCTTTCAAGCTGGGTTCCGAACTTCTCGAGTACGCAAGCCTTTGCCCTATACGAACTAGCATCAAATCAA  
ACAATTCAAGATAAACTAAGGCTCGAAATTAATGAGGTTTTAAGAAAACACAATGGACAGTTCACATACGATTACG  
TTAACGATATGGATTACTTGGGAAGGGTTATAGATGAACTTTAAGAAAATATCCGATCTTTCCCGTATTACCACGT  
GCTGCTACTGCTGACTATCAAGTGCCAGGAACCGATGTAATAATAGAGAAAAATTCGTTCTGACTAGTTACTAATT  
TGGGCGTCCACTATGATCCAGAATACTATCCAG

> RferC23577\_CYP6ABfra9

ATGTACTCCGGCTAAGAAATTACAAACCATCGGGAAGAAACGACTTCATTGACCTGATGTTGGAATGTAAACAGA  
AAGGGACTATCGTCGGGAATCTATCGAGAAGCGAAAGAAGGATGGAACCTCAGAAATCGCGTCCCTTGAGCTG  
GACGACACGCTGATTGCGGCACAAGTGTTTCATCTTTTTCGTGGCCGGATTTGAGACCTCCTCGTCTGCTACCAGCTA  
CACGTTACACGAGCTAGCTTTCCATCCTGAAGTCCAAGTGAAGGTACAGGAAGAAATTGACACAGTTTTGGCCAA  
GCATGATAACAAATTATCTTATGATTCAGTCAATGAGATGACTTATTTGCAATGGACGCTCAAAGAAGCTATGCGG  
ATGCTGCCTTCGCTCGGGTACATAAGCAGACAAAGTGCAGGCGGTATACGTTTCCGGAGCTAGATCTGTCCATA  
GATGCAGAAAGTGGCGGT

> RferC24987\_CYP6HY3

CGGGTATTTGGACTTTGGTACCTTTTTCGATAACCACGTCGGTCCCAGGAECTTATAGTTTTGCTACATACGCGC  
GGAAGTTTTGCTCCTGGTGGATATTTCCGTAGCGTTTCTTTTTCCGATTTGAACCCTTCAGATTTGTAACCTTATAC  
AGGCCGAAAACGCTTGTAATCAACTTAGTCTCGCCTGTAGAATCTAAACAAACACGTTACACATCCTGGCCG  
AAGACCGACAATTCCTCACCTCTTGTCCGATGCCACAGAGTACCGTTCAAATTAGCCCTTTGGGCTGGGT

> RferC28096\_CYP6AEfra6

CTAAAACAATGGAAAAGGATGCTGATAAAAATCCATTCACGATAATAGGTCACGATTTATTTTTAGAGACAAAAAT  
TGGTGGTCTGAAAATGATTGTTCTATCTGGCCCGCTTTTTTTACGGATTACGTCTCAGAAATTATACTGAGA  
ATATAAGTTCATTCTCCACAATCTCCTGACAAAAGTGTTCGCGGGACGAACTATAAACCCACAACAAGGAATGA  
TTTTGTTGATTTACTTCTTAATTTATATAACGAAAAATATTTAACTGGTGACAGCATAGAGAGCATGAAAGGAGAA  
AACAAGAAAATATCTTTG

> RferC29183\_CYP6ABfra10

ATCTCGAAATGATTCTGCCAATTATAGTAATTGCACTCCTCTCGTTATACTACTACAGCACACGAAATTTCAATTATT  
GGCAAAAACGCGGCGTCAAACATGATAAACCAATACCAATTTTCGGAAATGACCTCGACCGGAATCTTCTACGGA  
AAAGTATCTCGCAAATTGAGAGGAAATGTAAGTATCCAATGAAAAAGTTGTGGGATTTTTTCGTTGCAA  
TGACCTGAATTGGTGATCAGGGACCCGAAATAATAAACGTGTAAGTGGTACGGAATTTGACTATTTTTATCCA

CGCGGGATCAATCATAAGGAGGTCGTGGAGCCATTGTTGAGGAATTTGTTTTTCGCAGACGGCGATTTGTGGCGG  
CTTTTGCGGCAGAGGATGGCGCCATCTTTCACGAGCGGGAAACTAAAAGCAATGTTTCCTCTGATA

> RferC29199\_CYP6fra3

AGTGGTGTCAATTGGTTGCCCTTTACTTTATATAAAACATAAACAATTGTATTGGAAACGACGCGGTTTATATCAAT  
TTAAACCCGAATATTTCTTCGGCAATGCCAGGAAAGAATTATTCGGTCTAGGTTCCATTTTCTGTTGTTTCGCGAC  
ACTTACGAAAAAGCCAGAGCGTTGAAAGAAAAACATTTTCGGAATATATTTCTTCTGGGATCCGCTTTATGTCCCA  
CCGACTTGAACATCATCAAACACATCTTAATAAAGGATTTTCAACATTTCCACGGCCATGGTTGGTTCTCGCATCCC  
AAGGATCGCTTGTGATGAACCTATTCGCTATGGAAGGCGAACCGTGGAGAGTGCTTCGAGCGAAACTCACGCCG  
ACGTTTACGTCCGGAAGGATGAAGATGATGTTTCGATACTTTAGTGCGAAGACGG

> RferC30579\_CYP6fra9

GAAAAGAAGTTTGTGGGGTTAAAGACGTGTTGGGCCGGTTTACCACCGACGTGATCGGAAGTTGTGCCTTTGGCA  
TCGAGTGCAACTCATTGGAAGACCCAGACAATGATTTTCGATGTTACGGAAAAAAGTCTTTAAACAAGCACCCCTC  
TAGGTTGATTTATATCATTTCATACCGCATTGGATCCTAAGAGCTTGGGGTTTTTCAGTTTCACG

> RferC33510\_CYP6fra8

GGCCTTCCAAGTTAAAGATGTTTCATAGAGAGGACATCTCTAGGTTTATAATAGGCGCCGTGCCCTTGAAATATGC  
AAAATCTTTTACCATAATGTCCTTGATCAAGGCAGGGTTGATGACTATCAATCCAGGCGAGTGAAATAAGTAACT  
CCAAGATATTTGATGTTTCATCTGTTTGCTTTCCTTATATCGATTTAAGAGCCATTCTCCAATGTTTTTGGCCAGGA  
GGAAGTGTCCCATCATTTGTTTTACCCCGCGCCTCTGCCG

> RferC33511\_CYP6ABfra11

CTATGTTTCACCTTATAATATCTCGAGCAGAAAACTTCAAGCCATAACTGATGAAATAACAGAAAGAGATTATTAT  
GACGCAAGAGAGTTGATGGCAAGGTATACAACAGATTTTATTGGTGAATGTGGTTTCGGAATAAATATGGATACG  
TTATCTGATGAAAACAACCAATTCAGAAGACTCGGAAAAAGAATATTTACAAAACGCTTAGGGATAAGATATGTT  
TTGCATTAATAATTTATTTCCAGAATTTGCAAAAACTTGAACATATTAGCGCC

> RferC34724\_CYP6fra7

GTTTGCTCCCAAAGATCTGGACAAATCTTCTCCGAAACAGTGTGGATACCATTGAATATCGGGAGAAGTACGAC  
GTTAGGCGTAAAGACTTTATGGATTTGTTATTGCAGTTGAAAAATGGGAGCGATGACGGGAAACACCCGCTGAA  
TCCCAAAGATTAACCGTTGACGAGATAATTGCACAATGCTTTGTTTTCTTCTGGCTGGATTGAGACGTCTTCGAT  
AACAATCACCTTTGCTCTATTGGAAGTGGCATTAGTCAGGATATTCAGGAAAAGTTGAGAAATGAAATCCTC

> RferU21\_CYP345J1

AAACAACGCATGTAAAAACAACGTACAAAATACTGTAGTTCTGTACAAACAGTACCTAATTGCCACAAAATCGG  
ACATTATAGAAAATATTATTGTTTACGCCGAATCTAGAGGTCGATTATTAGTTGTGTACGAACATATATAAAGGGA  
ATAGATGCGATGTAAAATAATAGTTTCGAGAAGTGAACCTGTGGTGCAACTATATAGTGAATTGCAGATTGGTTAAT  
TAAAAGATTGAAAGATGGCGCTCTGGTTAATATTTCTTGGTCCACCTTAGTGACTCTCTTATTATATCTATACA  
TGACTAGACACTACTCCTATTGGAAAAAAGAAAAACATTCCACATTAACCAACTCCCTTTTTTGGAAACATCATG  
AAATCGATGACACTTCAAAAATCAATCGGCGATGTCATCAAAGAATTATATAACAGCACCGACGAAGACTATATGG  
GAATATTCATTATTGATAAACCCGTTCTACTGATACGATCGCCAAAACCTGTTAAGGATATTTACTCAAGGATTTTC  
GCCACATCCCGATCGGTGTGTTGTTAGTCCCGAGACACCCGTGTTTACATCTGGTAAACTCAAAGCCATGTCTAC  
TCTGATAGCGAAGGAGGCCGAACAACCTGAATGAATATATAGGGAAACATTGCAACAACCTAACTTAGAAGCCAA

AGAGATTTGCGCCAAATACTCAACCAATGTTATTGCTATATGTGCCTTTGGTGTGACGCGCAAAGTGTTCGAAAGT  
GAAGATGCCGAATTTAGAAATTCGGTCGTAGGATATTCCGATTTTCAGTGGCCAATATGATTAGACATATAGGAT  
GTTTCTTCACACCCAACATTATAAAGCTATTTCAAATATCTTTTGTAAGGACGAAATCTAAATAGGCTAGGAGAT  
ATATTCACTGAGGTGCTACANNNNNNCATTTCCAAGCAATACAATTCTTTGTAGCCGGTTTTGAGACAGTGTCCG  
GTGTTTTAAGTTTTGCTTTATACGAATTGTGTATTAACCCGGACATTGAGGAAAAGTTGCGACAAGAAATTCAGGA  
AATCACAGAAAAACAAGGATTAACCTACGACTCTATACAAGAGATGAAATATCTCGACATGTGTGTTTCAGAACT  
TTGAGAAAAGTATCCGGTATTACCATTTCTGGACCGTGTCTGCAACTCTAACTATAAACTAGAAGGGACCGATCATG  
TGATCGAAAAGGACAATCGGTCTACATTTCCATGTTCCGGTGCATTATGACCCGAAATATTTCCCGAACCACA  
CAAATTCCTACCCGACAGATTCCGGGATAAAAATAGCATCAATCAGGACGGCTTTTATTACATTCCGTTCCGGCGAG  
GGACCTCGAATCTGTATTGAAACAGATTTGGATTGATGACAGTCAAAATAGGCTTGGCATCGATTTTAACGAAAT  
ACAGATTATGCAGGAGCAGCAAAACACCAGTACCTATTAGATTCCAAGTGAAAAGTTTAATTGTGCAGTCAGATGT  
TGGAATACCACTAAAATTTGAACCACTGTAATTTTTATAACTCTGTGCAAATATGTTACTGTATCAGTAACAGTTT  
TTACAGTACCATAAAGATATGTGACATGTGAATCTATGATTATACTAGTTATTTTTAATACACACTGATAACACAG  
TTTTCTTAACTTAAATATATGTTTTAATATTAATAAATCTTTGTGATTCTTATTATAAATCAAATAATTTAAACAAT  
GTTTATTGAATTATGTGAAAGAGTAAAGCAATGTGTCTTAATAAAAAACAAATTTCTCCTGCAAAGAAACAGAAC  
AA

>RferU43\_CYP393

ATCGTATGGTATGTTGACTGTTGATGATGTCCGTTCCGTCGAGTGTCTAATAAACAGCAGTTAAAAACATGTGA  
ATTAGTGAACAAATATGTCGTTAGATGATTTTTGCTACGAGGAGAACTCCCATTTGTGAAATACTTAAACGAGAA  
GGTGTGTTATATTGTACTCTGCTAGCTTTGCTGGTATTTTTCTCCTGATATGGGTCATACAGAACTATACATT  
CTTCGAAAAAGCCAAAATATTACGTGGATCTTCCCAAATGCCATACGGTAACCTAAACAATGTTGTCAATAAAG  
ACAACACCATATACGAAATGTTATGAAAAATTATAACAGATTCAAAGAAAAGCAGTGCATATTGGTGGTGTGT  
TCTTCTCACTAAACCTGTAGTGGTGGTGAAGCCTGAATACATACAGGAAGTTCTAGATAATAGTGATAACTTT  
AAACAAGTATTTCTGAACAGGTCAGTCAAATATAGGTGAAATATTACGTCGAACTCGGCAAATAGTTTTATTC  
AAAAGTACCGAGAATCTTTACGCGGAGTGTATCAGAAAAATTGCAGAACTATGACTTTAGTACGGTTCTGCGCAG  
TCACCTGCTTGAATGGCATCGCTGGCTTTTGGACTCAATTCACCTAGTCTCGTTCGAAGAAATAAACCACATCTGA  
AAGCCAAAACCTGACGCAAACTAAAATACCATCTGGGGTTGTGCTATCCTTTACTCAAAGTTCGAAACAGCTCGTT  
GTATCGAAATTTAAATTCATTTGATATTACACAAGCCAGGAAAAACAATGATAATTCGTATGATGATATTA  
TTCAATATTTTATGGATTTTCAACGGAAATCCTCCACAGAACCTAAAATAATAAGTGAATATTGTTTGACTTATAC  
GCAGATGTTTTAACACACACCTATTGAGTTGTTTTGCTTGTGTTTGTGAATTGAGTAAGAATGAGGATGTCCAAGA  
CGAGCTACTTGGTGAATACGACGATACAATAAAAAACATTCAGTAATGGATATAGACAGTTTAAAGGAACCTTGA  
ATATTTGAATGCAGTTGTTCTAGAAACCTTGAGGAAATATCCACCAGTTCCTTTTATTCTGAAAATAGCCAAAAAG  
ACTTTACATTGAATAACGTACAATTCCCCAAAGGAGTTTTAACTGCTATATCAATCCTTGGTATTTCATAGGAACCCG  
GACAACTATACGAATCCAGAAGATTTGATCCGGACAGATTTGCTGAACAACTAACAGTGCCTTTCTCCCTTTTCG  
GAAATAAAATAGAAGAAAATGTTTTAAATGGTGGTATTATTTACCAAACCTCATCATTGACACCTTGACGGCC  
TTGAAAGTTAGCAGGAAGAATGACTCGAACGCTGTGTTAAAGTTTCGACCGCAATCTCATTCTAAGACTTTCTG  
AGTCTTATCTATTAACGTTTGAAGATCTTAGTTGTAATATGTTGAGAATTGAATAAAGAGACTTTTTAAAGTGTAA  
AAAAAAAAA

> RferU2\_CYP9CS2

GTCGACCTAGCATGTGTTATTCTTTATTTGTATCTGGTTAAGTGTAAACACAAGTCCGTCGATGACGCAGACACTC  
ATCTGCGCATCGCTTCTACTCCAAAACAAAAACAACATCCANCTGAATAGTGCATAATTCTAACCGTGGGTGCGTG  
TATTGTTTCATTATTTTCAGCATCCATATTACTGTTTTGTTTATACCAGCTCGTAAKATATAACTAAGGACTCACCATG

TGGTTTATTTATGTTGGAGTGCTATGTTTATTATCGGTATGGTACTACATTAGGACTTAYCGCGTATGGTCTCGTAG  
AGGAGTGAAACAAACCATACCATGGCCGTTCTTCGGGGATTCTGGGATAACTGTCTCCAGCTAATGAGCGTCCCA  
GAGATACTAAACAAAATTTACTACATGTATCCCAAACAGRTACACCGGATTCTATCAGTTTCAGGAGGCCCTTTT  
GCTACTGAAAGATCCTGAATTAATAAAACAAATCACTATTAAGGACTTCGACCATTTTACCGATCATCGCACTGTTG  
GATCTAGCGATGAAATTGATCCACTGTTCAACAAAAATCTCTTCTTTTTGAAAGGGCAAACCTGGAAGGATATGAG  
ATCATTACTCTCTGGCTCATTACCAGTAGCAAATGAAAATAATGTACAATTTAATAGTCGAAGCTTCTGAAAATT  
TCGTTGACTACTTTTGTAGTAAAAACGAAGATTTAGTCGAAGTAGAATTTAAAGACATATTTAGCACAATATACAC  
GACGTTATCGCATGCTACATCATATTCGAGAATAACTAAGTTGATTCACTTACGGCAACCCCAAAATGGAATTTTTAT  
GCTATGGGGCCGTACCAACTAATAGCTAAACGTCCTCGAAAATTTAAATATTAGCGAAAAGACGCTTCGGATTTTTT  
NATAACATCATAGACCAAGCCATTAGAATGAGAGAAGAAAATCATATCGTTAGAAAAGATATGATCAATATAAT  
GCTTGAAGAAAGAGAAGGAAAAGCTAGGCAAGATGACGAGGAGGTTATAGATTACAGGATTTGCTGTTGTGGAAG  
AATCTCAGCATATCACAAAACATCCTAAAAARCAGATGAATCTAACCAACTTGATATTACAGCTCATGCCATGATA  
TTTTTCYTAGCTGGTTTTGATACTGTGTCTACCGCTATCTGTAAGTCTGTTACGAACTGGCTATCAATCCAGATATC  
CAAGACAACTGCGAAATGAAATTAAGAAAACAATGAAAGAACATAATGAGAAGCTAACTTATGAATCAACTTTG  
CGTATGAAATATTTGGACATGGTTATCACAGAAACCTTGAGAAAGTATCCAGGACTGTCTGCCACTGAGCGTGTAT  
GCGTTAAACCATACTATCGAACCAGTATACCCAGACGAACAGCCAGTTCACCTAAATGTTGGGGACATTGTCTT  
CCTACCACATATAGTCTCCATCACGATCCCAAGTATTTTGGCGACCCTGTAAAAATTTATTCCAGAACGATTTTCA  
GACGATAATAAAACGTCGATAAAACAAATATACATATGTGCCATTTGGGATCGGCCCAAGAGCCTGTATCGGGAGC  
CGATTTCGACTTACTGAGATGAAAACCTTGTTAATACAATTGGTAAACAAATTTGAAATTGTTCTGTTCCGAAAAC  
GAAAATTCCTATGGAATTATGCAGGAGCACGATGAGCGTTATGTCCARAGACGRGTATTACGCGGCTTTTAAACTA  
CTAAATGAATTAGCATATTGTATTTCCTTCTATGTAAGTTATAACTGTATTAATAAAAGCCACCAATAAATTTAA  
GAAAACACAAAAAAAATTAGAAATTGAAATCCCTC

> RferU11\_CYP9Z33

AAACATCACCAGCTGACTGTTTATTCTATGAAAATAATCGACACATTAACCGTGTTCGGTGTAGCGGCTATTTT  
TACTGGTTATATAGTTAAGTACTCTTGCTAAGAAGATGTTTTGGCTTGTGTTAGCGGCTATACTTGCCATCTTGATT  
GGTACACTCTCGATAAGCCTTTGAGATATTGGTTCGGACAGGGGCGTTAAACAATCGAAGCCATGGTTGATCTTTG  
GAGACAGCTGGGTGAATGTATTCCGAACAAAAAGTTTTTGTGCGAGTACATAGAATGGGTGTATAATATGCAACCT  
AACAGCAGATATTCCGGTATCTACCAATTTTTACCCCACTTTGATATTACGCGATCCGGATTTGATCAAACAAATT  
ACCGTTAAAGATTTTGACCATTTCACTGATCACAGTAAGTTTGTGCGATCCTGAAGCTGATCCCTTATGGGGCAAGA  
ACTTATTCGCCTTAAAAGGACAACGATGGAGAGAGATGAGAGCAACATTGACTGGAACTTTTACTAGTAGCAAGA  
TGAAGGCAATGTTTAGTTAATGGACGAAGCAGCCGATACTTTGTTAAGTTTTATGGGGATAAAGGCGGCGATAA  
AATTGAACTGGAGATGAAAGAAACGTATAACCAGATATACTAGTGATGTTATTGCTACCACAGCATTGTTGTTAAG  
GTGGATTCCCTAACGCAACCAGAGAACACGTTCTACCTGATGGGTAGGAAGATAACAACTTTTCAGGAATTTTAA  
TCAGCCTAAAGTTTTTTGGATTCTTTCTGGCACCATCGTTTTTCAAGAAATTCAAAATATCTATGCTGGATAAAGCT  
GCGTCCAAGTTCTTCCGCGCTACCATTAATGAAACTATCCAAATGAGAGAAGATAAAGGTATTGTACGCCCTGATA  
TGATAAACATGTTATTGGAGGCAAGGAAAGGTATCAAGCAAGAAGATAATAGCGATACGATTGATGCTGGTTTTCG  
CTACAGTTCAGGAATCAACTGATATAACAAAATTCGCCAGCTTAAACAATTAACAAATGATGATATAACATCTCAA  
GCTTTGATCTTTTTNTCGCTGGTTTTGATGCCATATCAACAGCTATGTGTTTTGCATCTTACGAATTGGCTATGAAT  
AAAGATGTTTCAGGATAGACTGAGAGAAGAAATAAAACAAACTTATGAGGAAAATAATCGTAAACTAACATATGAG  
GCCTTATTAAGATGAAATATATGGATATGGTAGTGTCTGAATTGATTAGAAAATGGCCGCAAGGAGGATTGTTA  
GATCGTATTTGCACCAACCATATACTATCGAAGCAGTAAGCACCGGACGAAACGCCCGTAAACAATTCAGTTGAT  
GGTCTATTGTGGATTCCCGTTTTTGGTATACATAGAGATCCCGCATATTATCCGGATCCCGAGAAGTTCGACCCAG  
AAAGATTTAACGACGAAAATAAAGTGAAGATCAAACCGTATACATATATTCCGTTCCGGATTGGGTCCGAGGAATT



GTATTGCTTCCAGATTCGCTCTCTGGAGACCAAAGTACTTGTTGTTTAAAATAGCTGTTGAATTCGTAGATTAGC  
TTTTCTAGATAAGATGCATTTACCATTGAGATTGTCTAGAGGACTCAATATTTCTGTTGACGGTGGATTTTGGTTCA  
ATCTAAAACGAATTTCTAGTTAAATTTGTTAATTATTTATTTAGATGACAATGTTACTGCTAATTACTGATAAAGAAT  
TTTATATAGTACGTTGTTAATATTTATTTGAAAATAAAAAAGATGAAAATCTAAAAGGATTTTGAGAAATAGAATA  
GAATAAAAAATTATTAATTAATGAACCAATAAAAAAGATCAATAAAAAATAATCAATAAAAAATACTATTTTTAAATA  
AACTAATTTATGTATATTATCAGCATATTATTCTCGTTCTATATCTGTTATTTTATAAGGTTGTTATTTCCGTTTCTTT  
AGCGTTAGTTATGTAAAAAGTTAATGGTGTAAATAGAAATAGTAGAGAAATGTTTACCTTTTTCGCTTTTTTATTC  
TTAGCTGCATTCGGCCTCAAGCCAAGTTTTGCTTGAATTGTATTTTTCTTTCAAAAAAATATTTTATAGACTGT  
TCCC

> RferU12\_CYP9ANfra1

GTTATTCAACTGAATTTCTTTCACTTATCTTATCAATTTGTAATATTATATTGCACAATATGATTTCAATTAATT  
AATGTAATTGAAAAATGCAACATATAATGCAATATAAACCGCAGTTCTGAGTAATGACTAAAAATATATTGTTTAT  
AATTATATCGTTCATTAATAAAGTAGAATAATAATTTAACATGTTATACTATTTGATATTAATAGTGATATTATTTAT  
TTATTTCTTATATTCTACTCTATATTCGAAACCGTATTCTACTGGGAAAAAGAGAGGAGTAAAAACAAGGAAGGCC  
ATGGATTCTCTTTGGAGATAGTTGGCCATTAATTTTTCGTTTGAAGAATATAGCGGAAAATGCTTCTTATTATTATG  
AAGAAATGAAAGATGTTAGATATTATGGTATATATCAGTTTTTAAACCTAAATTAATAATACGCGATCCTGAATTG  
ATAAAATCTGTTACTGTTAAAGATTTTGATCATTTTACTGATCATGTTGCTATGGTAGAGCCAAAAGCTGATCCGCT  
ATTTGGAAAAAATTTATTAATGTTGAAAGGAGACGATTGGAAAAGTATGCGATCGATGTTAACGTCATCATTACT  
AGCAATCGCATGAAAATCTACAAATTGATTTTCAAGAAGCTGATGAAAATTTTCAATATTTTTTGAATCAACC  
TGGGGATATCATCGAAATTGAAGCAAAGAACTTTTGAAGGTATACCATAGATGTGATTGCCACTACATCCTTT  
GGTGTTAAAGTTGATTCTTTAAATGATAGAAAATAACGAATCTTTTCGCATGGGAAGTGAATTGGCGAATATCAGTT  
TCACGTCATTTCTTAAAATCCTACTTCGGCAAATTTACCAACATTATATAAGATGTTTAAAATAGACAATGTTCAGA  
AAAGAAGGTAACGATTTTTTACAGCTCTGATTAGTGATACAGTATCAACAAGAGAAAAGGAAAATATATATCGT  
CCGGATATGTTACAAAATTAATCGATGCCAGGAAAAAATGGAGAGAAAGAGAGCTTTACCATTGAGGATATC  
ACTGCCAAGCGGCTATTTTCTTTGCCGGTTTTGACTCGTTTTCTCAGTAATGAGCTTCACTAGCTATGAGTTA  
GCGCTTAATCAAGATATTCAAGACAACTGCGTAAAGAAATTTAGACATTTCTGAAGAAAATGATGGGAATATTA  
CCTATGACGTCATTAAGCAAATGAAATATTTGGATATGGTAATTTGTGAGGTATTAAGAAAGTGGCCTCCTTTTGC  
ATTATAGGTAGAGAATGTACTAAGACATATGTGATTGATCCAGTTTACCCAGGAGAAAAGAAAGTAGTAGTACCT  
AAAGGAACAGCAATACAAATTCATTATACGCAATTCATCAGATCCAAAATACTATCCCGATCCTGAAAAATTTAT  
TCCAGAGCGATTCGGCACAGAACAAAAGCATCAAGATAAATATTTCCATTTGGTCAGGGTCCAAGAGCATGCTTG  
GGATCAAGGTTTGCCTTGATGGAAATAAAAAAATTTTTGTTACATATTGAAAACATTTAAATTGGTTACAACAGA  
AAAAACTCAAATTCCTCTTAACTAGTGAGGAAGTTTTCTGTGAATGCTCGACCAGAAAATGGTCTTTATATTGGTT  
TACAGAAGTTATAGTTACATATTTACATTATTATATTAATGCAATTAAGTTAACTGATTAGAGCCAGTTAACTTT  
ATTTTTTATATTATACAATCAAGGGAATTGTCAGGTCTAGTTATTTAAGCCCCACATTTTTTATATCTTACTTTGGTG  
GACTTTAAACTAATTATAAATGTTTGGGATTTTGATAAGTTGTTTAA

> RferU13\_CYP9Z86

AAGCAGTGGTATCAACGCAGAGTACGCGGGGATACACAACACACATATCCGCATCATCGAAATTAATCGTTGCAT  
ATTAGCTGTGATTTGTTTTGTAGTGGTTATACATACTTACATACGTTGTAGTAAAGCAGTGCTAACAAAGAAGATG  
ATCACGCTGGGGTTGGCTGCAGTAGTTGCCATCCTGATTTGGTATACTCTTGATAAACCTTTGAAGTATTGGTCGA  
ACAGAGGTGTTAAACAATCAAACCGTGGTTTATCTTGGGAGACAGTTGGGTTAATTTATTACGAACAAAAAGTTT  
TTGCGGATATATTGAATGGATGTATAATATGCACCCCAACAGCAGATATCCGGTATTTACCAGTTTCATACACCGA  
CGCTGGTTATACGTGATCCAGAGCTGATTAACAAATCACAGTTAAAGATTTTGACCATTTACAGATCACAGGAA

TTTTGTCGACCCTGAATCCGATCCATTATGGGGCAAGAATTTGTTCTCCTTAAAAGGGCAACGATGGAGGGAGATG  
AGGGCGACGTTGACTGGGTCTTTTACCAGTAGTAAATGAAGGCAATGTTTAGTTAATGGATGCAGCAGCCGAT  
ACTTTTCGTTAAGTATTATTGGGATAAAGGTGATGAAAAATGGAGCTGGAGTTGAAAGATACGTATAACCAGATAT  
ACTAGTGATGTCATTGCTACTATAGCTTTCCGCCCTCGAGSTAGATTCACTATTACTCAACCAGAGAACACATTCTATC  
CCCATGGGCAGAAAAATAACAAATTTTTTCAGGGTTTGTAAACGAGTCTAAAGTTTTTTGGATACTTTATGATACCATC  
ACTTTTCAAGAAATTCAAATATCCATGCTGGATAAAGGCGCATCTAATTTTTTCCGCTCTGTCATTAGTGAAACCA  
TTAAAGTAAGGGAAGATCAAGGTATTGTACGACCTGATATGATAAATGTGCTACTGGAGGTTAGAAAAGGTATTA  
AACAAGAGGATAATAGCGATATAATCGATACTGGGTTTGCTACAGTCGAGGAATCAAGTGATATAACAAAATTCC  
GTCAACTTAAAAGTTTAAACAAATGACGATATAACGTCTCAAGCTTTGATCTTTTTCTTTGCTGGATTTGATGCAATAT  
CAACAGCCATGTGTTTTGCATCTTACGAATTGGCTGCTAATAAAGATGTTCAAGATAGACTGAGAGAAGAAATAAA  
ACAACTTATGATGAGAATAATGGCAAACCTATGAAGCTTTGTTAAAGATGAAGTATATGGATATGGTAGTA  
TGTGAATTGCAAAGGAAATGGCCGCAAGGGGCACTGTTAGACCGTGTTCACAAGGCAATATACCATCGAAGCA  
GAAAGACCCGATGAATCGCCTCTAACCATCCAGTTGGGCAGCTACTGTGGATTCTGTTTTTGGAAATACACAGGG  
ATCCTTCATATTATCCAGATCCAGAGAAGTTCCGTTCCAGAAAGTTCCAGCGACGAAAACAAAGCCAAAATCAAGCC  
GTATACCTATATTCCGTTCCGATTGGGCCGAGGAATTGTATCGGTTCCAGATTCCGCTCTTCTCGAGACCAAAGTTT  
TATTGTTTTAAATGCTATTGAACTTTGAGATCAGCTTGTGAGATAAGATGCCCGTACCATTGAGGTTAAGCAAGGG  
ACTCAATATTTCCGTTAGATGGCGGGTTTTGGTTCAATATAAACGAATTTCTAGTTGAGTTTGTGATTTCAATGAA  
AATATTACGATGTATCTAGTTTAAATGCTAATTGATAATAAAGAATGTTTGTGTTTTGTAAAAAAAAAAATTTATTTATT  
ATTATTT

> RferU19\_CYP9Z82

CATGCGATTTGCAATATTTTTCAACCTCAATACTGCCGCTACATCTGTTGGATGCCGCCGACTCGTTGACTCAGAA  
CGAAACAGATTACAAGCGTTTCGATGGCTTTCTGCGCATTCAACTCGCACAAAAGATAAAAACAAAATCATGAACTAG  
TGGAATATAAACAAAATCACCAGCTGAGTGCTTGTGTGTATAAGTGATCGACGTGAAGGTGTGTTTTGTTTAGTG  
GTGATAATATCATATAATAACACACAGTGAAGTGCTATAGTTCCANNNNNNNNNNNNNNNGTCAAACAATCGAA  
GCCATGGGTGTTTTTCGGCGATAGCTGGGTGACTATCTTCAGGAGACAAAGCTTCAGCGAATTCGTCCAATGGGTC  
TACAATATGCATCCTACCAGCAGGTATTCTGGTTTTTACCAGTTTTACACGCCACCTTAGTTCTGCGTGACCCCGA  
ACTGATTAAGCAAATCACCGTCAAGGATTTGATCACTTCACTGATCACCGAAGTTTTGTTGATCCCGATGCTGATC  
CATTGTGGGGCAGGAATTTGTTCTCTTTGAAAGGGCAGAAATGGAGGGAGATGAGAGCAACGTTGAGTGTTCTT  
TTACCGGTAGTAAGATGAAGACCATGTTCAATTTGATGAACGAGGCTGCTGATAATTTTCGTTCCAGTATTTCTTGA  
CAAAAATGAAGATCTAATCGAACTGGAAATGAAAGATACTTATACGAGATATACTAATGATGTTATTGCAACCACT  
GCCTTTGGTATCAAGGTTGATTCATTGACCCAGCCAGAGAATACTTTCTACATGATGGGCAAAAAATGACGAATT  
TCTCCGGAATTCTGACCAGTCTGAAATTTTTGGTTATTTTCTAATACCATCGCTTTACAAGAAATTGAAAATATCCA  
TTTTGGATAAATCGGCTTCGGAATTTCCGAACTATCATAAATGAAACCATCCACACCAGAGAAGAACAGGGTAT  
TGTTCCGCCCTGATATGATAAACATGTTATTGGAAGCCAGGAAAGGCATCAAACAAGATGATAACGATACAGCTCA  
GGATAATCAAGATACCGGATTTGCTACTGCTCAGGAATCACATGATATAACTAAATCCGCCAACTTAAAAACCTG  
ACAAACGACGATATCACCTCACAGCTCTAATCTTTTTCTTCGCTGGCTTTGACACGATTTCAACGGCCATGTGCTTT  
GGTTCGTACGAGTTGGCAGTTAATAAAGACATACAAGATAGATTGAGGGATGAAATTAGGACAACCTTATGAGGA  
GAATAATGGCAAATACATACGAGGTCTTGTAAAGATGAAGTACATGGACATGGTTGTGTCTGAGATATTACG  
GAAATGGCCTCCAGCTATAGGATCTGATCGAGCATGTACTAAACCATACTATTCCAAGCCGATTACCTGATGAG  
CCACGACTCACCATCGAGAAGGATGTAATGATCTCTATTCCAATAATAGGATTACACAGAGATCCCGTTTACTATCC  
CAACCCGGATACATTTCGATCCTGAGCGTTTCAATGGAGAGAATACGATTGAAGAATTTGCTTATATTCCATTTGGA  
TGCGGCCCAAGGAAATGTATAGCGTCCAGGTTCCGTTTGTGTTTAAATTTCTTCTACA  
TTTTGAAATTTTGCCTGGCAAAAAGTTACAGTTGCCTGTAGAATTGGATAAGTCGTCCTTAAATCTATTAATAAAG

GAGGATTTTGGTTTATTTTAAAGAAAACAACACCATAATAATAAGTGTATAATAAATTACTTCAGACAGCTAATATA  
TTTTTTAATTAAGAAGTATTTGTTTGTATATTATTTAGATTTTATTTATATTTTAGGTATAACTATTGGTTCATTT  
ATAATTTGATTTTGTATTTTGGACAATTATAAAAATGTTATTTAAAATTAGTTTAAGCATTTAAGCTGTGACATTAGT  
GTTAGTACCTAATTTTTTTTTACTTTAAATAAAGATATCTTGAAGCTTTAAAGAAAACAGAAAACAAAAGACAAAAAC  
ATGATTGGCCGCTCGGATCATAAAAAACAAAAGTACGTATGCTGATGCTTCTGATTCTAATCTAATTCGATTTTA  
TCTATTACCCTTTGTGTTTGTTTTATTTGTTTATTCTTATACAGAATATGATTATTCATATATATGACGCAAGA

> RferU20\_CYP9Z83

AAGCAGTGGTATCAACGCAGAGTACGCGGGAGAACGAAACAGATTACAAGCGTTCGATGGCTTTCTGCGCATTCA  
ACTCGCACAAAAGATAAAAACAAAATCATGAAGCAGTGGTATCAAAGCAGAGTCCATTACGGCCGGGGTGTGT  
ATAAGTGTATCGACGTGAAGGTGTGTTTTGTTTGTAGTGGTGATAATATCATATAATAACACACAGTGAAGTGCTATAG  
TTCACACTAACATGATTTGGATCATATTGGCAGCAGTGCTTGCTGCCCTCATGTGGTACGTCTTTGTTAAACCTCTG  
CACTATTGGTCAGACCGGGGTGTCAAACAATCGAAGCCATGGGTGTTTTCGGCGATAGCTGGGTGACTATCTTCA  
GGAGACAAAGCTTCAGCGAATTCGTCCAATGGGTCTACAATATGCATCCTACCAGCAGTACTCTGGTTTTTACCA  
GTTTTACACGCCACCTTAGTTCTGCGTGACCCCGAACTGATTAAGCAAATCACCGTCAAGGATTTGATCACTTCA  
CTGATCACCGAAGTTTTGTTGATCCCGATGCTGATCCATTGTGGGGCAGGAATTTGTTCTCTTTGAAAGGGCAGAA  
ATGGAGGGAGATGAGAGCAACGTTGAGTGGTCTTTTACCGGTAGTAAGATGAAGACCATGTTCAATTTGATGAA  
CGAGGCTGCTGATAATTCGTTCAGTATTTCTTGACAAAAATGAAGATCTAATCGAACTGGAAATGAAAGATACT  
TATACGAGGTATACTAATGATGTTATTGCAACCACTGCCTTTGGCATCAAGGTTGATTCATTGACCCAGCCAGAGA  
ATACCTTCTACATGATGGGCAAAAAAATGACGAATTTCTCCGGAATTCTGACCAGTCTGAAATTTTTGGTTATTTTC  
TAATACCATCACTTTACAAGAAATTA AAAATATCCATTTTGGATAAATCGGCTTCGGAATTTCTCCGAACTATCATA  
AATGAAACCATCCACACCAGAGAAGAACAGGGTATTGTTCCGCTGATATGATAAACATGTTATTGGAAGCCAGG  
AAAGGCATCAAACAAGATGATAACGATACAGCTCAGGATAATCAAGATACCGGATTTGCTACTGCTCAGGAATCA  
CATGATATAACTAAATTCGCCAATTA AAAACCTGACAAACGACGATATCACCTCACAAGCTCTAATCTTTTTCTC  
GCTGGCTTTGACACGATTTCAACGGCCATGTGTTTTGGTTGCTACGAGTTGGCAGTTAATAAAGACATACAAGATA  
GATTGAGGGATGAAATTAGGACAACCTTATGAGGAGAATAATGGCAAGATTACATATGAGGTTTTGTTAAAGATGA  
AGTACATGGACATGGTTGTGTCTGAAATTTAAGGAAATGGCCGCTGTTATAGGCACTGATCGTGTGTTGTACAAA  
ACCATGCACCATATCGAGCCAGTTACCTAACGARCCACTACTCAACATTGAAAAAGAAGTGATGGTATCTATTCCG  
GTATTGGGACTGCATAGAGATCCCGYTTATTACCCCAATCCAGAGATATTTGATCCCGAACGCTTCAATGGAGAGA  
ACACAATTGAAGAGTTTGCTTATATTCCATTTGGTTGCGGTCCAAGGAAGTGTATAGCATCCAGGTTTGCTTGGT  
GGAATTGAAGTCTTTGTTGTTTAAAGTTTCTTTAAAATTTGAGATTTTACCTGGCAAGAAATTGCAGTTACCTATAA  
AATTGGATCAAGCGTCATTTAATCCACTAATAAAAAGGAGGATTTTGGTTTATTCTAAAGAAATCGACACAATAATAT  
TATTGTAGTTTGTGATTTTATATCTGTAGTATTTTCTTAGTATGGAATAAATTTTTCAGGTAGTAAAAAGAAG  
ACAAAAC

> RferU33\_CYP9Z85

CAGAAGGATAACGAATTTCTCCGACTCTTACTAGTTTAAAATTTTTGGGATATTTACTAATACCAACAGTTTACA  
AGAAATTGAAAATATGTATTCTGGATAAAAATGCGTCCGAGTCTTTTACAGAATAATCAATGAACTATCCGGAC  
TAGAGAAGAAAAGGTATTGTACGCCCGGATATGATCAATATGCTGCTGGAAGCAAAAAATGGCATTCAACAAGA  
TTATCAAGATGTAGTTCAGGATTATTCTGATAATACTTTTGTACTGTTTATGAGTCAAATGATATAACTAAATCCG  
CCAATGAAAAGTTTAAACCAATGAAGATATCACGTCACAAGCTGTAATCTTCTTTTTTGGTGGATTTGATACTATAT  
CAACGGCCATGTGTTTTGGATCTTATGAGTTGGCGATCAACCAAGACATTGAGGATAGGCTGAGGAATGAAATCA  
AAAGAACTTTGAAAGAAAATAATGGTCAAATTACGTACGATGATTGTTAAAGATGAAGTATTTAGATATGGTGGT  
ATCTGAGATCTTGCGAAAGTGGCCACCAGTATCTAGAACAGATCGTGTGTTGCACCAAGCCCTACATCATCGAAAAT

AAATCTCTGGGNAACCCAAGCTTTATATCGATAGCGGCATTACCATTTCCATACCAATCATGGGCTTTCATAGAGA  
TCCACTTTATTATCCGGATNCCAGAAAAGTTYGNATCCTGAACGATTTCGACCAAGCGGATAAAAATTATGGATTATC  
CGTACTTTCTTTTGGATGCGGTCCCAGAAAAGTGCATCGCATCCAGGTTTGCTTTAATCGAATTGAAGGCGTTATTG  
TTAAGCTCGTTTTACATTTTGAGATAGTACCGAGCAGTAAACTACAGCAACCCATTCAAATAGCAAAAAGGTTTCGTT  
TACTCTGCAATAAAGGGGGGATTCTATTTAATTTAAAAAGCTTCTCTCTGAATATTTTTACAAAAAATTTGTTT  
TATTAAGTGGCGTATCCCCTGTAAGTTTAGAAATATTAGTGAATACATTAATTAATAGTTTGTATTTGAAATCGTT  
GAATGTAATAAATGGTTATGCAAAAAGAAACAGAACAAAAGACAAAACATGTTCGGCCGCTCGGTCTCTAGAT

> RferU48\_CYP9Z84

CAGAAAGATAAATGGCAATTATGTGTTATACTGGTGAATAAAAAACATCACCAGCTGACTGTTTATTCTATGAAAA  
TAATCGACACATTAACCGTGTTCCTGCTGTAGCGGCTATTTTTACTGGTTATATAGTTAAGTACTCTTGCTAAGAA  
GATGTTTTGGCTTGTGTTAGCGGCTATACTGCCATCTTGATTTGGTACACTCTCGATAAGCCTTTGAGATATTGGT  
CGGACAGGGGCGTTAAACAATCGAAGCCATGGTTGATCTTTGGAGACAGCTGGGTGAATGTATTCCGAACAAAAA  
GTTTTTGCAGTACATAGAATGGGTGTATAATATGCAACCTAACAGCAGATATTCCGGTATCTACCAATTTTTCCACC  
CCCCTTTGATATTACGCGATCCGGATTTGATCAAACAAATTACCGTTAAAGATTTTGACCATTTCACTTATTTCCCTT  
AAAAGACAACGATGGAGAGAGATGAGAGCAACATTGACTGGAACCTTTACTAGTAGCAAGATGAAGGCAATGT  
TTAGTTTAATGGACGAAGCAGCCGATACTTTTGTTAAGTTTTATGGGGATAAAGGCGGCGATAAAAATTGAACTGG  
AGATGAAAGAAACGTATACCAGATATACTAGTGTATTGCTACCACAGCATTTGGTATTAAGGTGGATTCCCT  
AACGCAACCAGAGAACACGTTCTACCTGATGGGTAGGAAGATAACAAACTTTTCAGGAATTTAATCAGCCTAAAG  
TTTTTTGGATTCTTTCTGGCACCATCGCTTTTCAAGAAATTCAAATATCTATGCTGGATAAAGCTGCGTCCAAGTTC  
TTCCGCGTACCATTAATGAAACTATCCAATGAGAGAAGATAAAGGTATTGTACGCCCTGATATGATAAACATGT  
TATTGGAGGCAAGGAAAGGTATCAAGCAAGAAGATAATACCGATACGATTGATGCTGGTTTTGCTACAGTTTCAGG  
AATCAACTGATATAACTAAATTCGCCAGCTTAAACAATTAACAAATGACGATATAACGTCTCAAGCTTTGATCTTT  
TTCTTCGCTGGATTTGATGCGATATCAACAGCTATGTGTTTTGCATCTTACGAATTGGCCATGAATAAAGATGTTCA  
GGATAGA

> RferU6\_CYP4G185

GTTCACTCGAACATAGACAGCATAGCCCACGTTTTTAAAGAGAATAACTATGATTGGGGCGCTTGAGGCTGTCTCG  
ACTTCACCAATTGTTCTTCCGAACCTTTACATCACTATCCTGCTAGGAGTGACGTTGGTCTGTTGCTTCGCTTTATTTA  
TGGTCTCAATCGCTGCGACAGGCCAAATTGACGAGCAATGTTCCCGAACCTTCAGGCCGGACGCTGTTATCCACAG  
CGTTAAATCCAAGCGATTTCTGAAGAAAATGCTTGAGGCTATACATGATTTGAAATGTGATGTGGGAAAATTCGG  
GATGGGTCCCTATTTCTTCATGGGACTGAAAGATCCTGTAGATGTAGAGCTTATTCTGGGTAGCCAGGAGCACTTG  
GAAAAATCGAGGGAGTACGGCTTGTTCGAACCATGGCTAGGAGATGGTCTCTTAATCAGCAAAGGCGAAAAATG  
GAGGACCCACAGAAAATGATCGCCCCAACTTTCCACTCGTCCATATTGAAGTCCTTCTTCCCTGTTTTCAACAAGA  
ACGCCAACAGGTTGCTGGAGAAATTGGAGAAAGAGAAAAACAAAATTTTTGACGTGCATGATTACATGAGTGGTG  
CTACCGTGGATACTCTTCTAGAAACTGCCATGGGCGTTGAAAAGACAAACAAGGACAATACTGGGTTTGAGTATG  
CCAAAGCTGTTATGGATATGTGTAATATCTTGCATCAAAGACATTACAAAATCTGGCTGAGGCCCGATTTTCTCTTT  
AAATGGACGAAAATGGCTGCCGAACAATCAAACCTATTAGACCTTATTACAGCTTAAGTAGAGAAGTAATTAAC  
GTAAGAAGGTGCACTATTTGAAAGGGAATCTAAGGGGGAGAAGAGCTTGTACAAGGAGGCTGTGCGCGCTGAA  
AATAAGGCCTCGAAGAAAAACGCCAAGACTGAAAATATTTCTTATATCCATGACGATTTGGAGGATATTGAAGAA  
AATGATATAGGAGAAAAGAAGAGGTTTRGCATTCCTCGACTTTATGATTGAAGCTAGTAAGACGGCCGGTAACAAC  
CTCACCGATGAGGAAATCAAGGAGGAAGTTGACACAATTATGTTTGAGGGACATGATACTACGGCAGCTGCATCT  
AGTTTCGTGCTTTGTCTGTTGGGAATACACAAAGACATAACAACAACCTGTATAAATGAGTTAAAAGAAAATTTCC  
ACGATAGTTGGGAGAGGCCAATCACTTTTAAACGACACATTGCAAATGAAATATCTTGAACGAGTAATCATGGAAA

CTCTGAGAATGTACCCTCCAGTGCCACTAATTTCAAGAAAAGTAAATCGGGATGTTAAGTTAGCCTCAAACA  
ACTA  
CATCATACCAAGCGGTACAACCGTAGTTGTATCACAATTCATGACCCACAGACACCCAGATATTGGAAAAATCCC  
GATGTCTTTAATCCAGATAACTTCTACCAGAAAAGTCCAAAACAGACACTACTATGCCTATTTTCCATT  
CAGTGC  
TGGACCTAGAAGTTGTGTGGGACGTAATATGCCATGCTGAACTGAAGGTGATAATTGCCAGTGCCTGAGGAA  
GTATCAGATAACGTCCCCTAAGGCAGAATCCGAGTTCAGTCTGCAAGCTGATATCATTCTGAAGCGTACAGATGGA  
TTAACATTTAAATGAAGATCGAGTTTTCGCTTAACAAATAGAAAAGTACATAGTGTATTATAAATAGTCTATGTTT  
AGGAACATTGTATTGTAAAAAGTGGAAATAATGTTATGTTGTAAGCAAAAAGAAACAGAACAAAAGACAAAACATG  
TCGGCCGCCTCGGCCTCTAGAAT

> RferU7\_CYP4BD13

AAGTGTATTTACCGGTGTTGAAGACCTATCTGGATGAATACGGAGATACTGTACTTATTCACGATGGACCATTTAG  
TCGGTTATTAATCACCGTTGATTATGAATTGACTGAATATTTGTATTCCTCTACGGTAGAAATCAATAAATCTGATC  
AATACAAAATTCTGCATGGATGGCTTGGAGATGGACTTCTGACAAGTTCTGGTAATAAATGGAGAAGCCGAAGAA  
AAGCAATTACGGCTCTTTTTCACTTTTCAATCCTTCAAGAGTTTATTACATATTTGAGGAAGTCGGCATGAAACTA  
ACTAAAAAATTAGTCTGAAATACAAAAGTAAAAGAGCATAGATGTGACTAACGTGGTATCGCTTTATACTTTGGAC  
GTAATATGCGAGGCAGCCATGGGAGTTCAACTAAACGCTCTGGATGACGATACGTCCGTTTATGTCAAAAAGTTG  
AAAGATCTATGCGCTATATTAGCAAGAAAAATTTTTACCTCTTGATTCTAAATTATATCCCCTTACCTGGATGCAC  
CACAAGGAAAAAAGCATTAAAAGTAATTCATCGATATATCGAAGATGTGATACGACAAAGAATCGAAACAAAGA  
AGCAAGAAAGTTTAAATTATCACGAAGATAACACTAACGATAAAAAGTCGAAAAAAGCTGGCTTTCTGGACCTTCT  
ACTAGAAAAAAGAAAAACAAAAGTACTCTGCGTCAATACCACGACCTAAGGGACGAGGTTAATACATTCATGT  
TCGAAGGACATGACACTACTGCAACAACAATTTGTTTTGTCTATATATGTTGGCAAACCATCCATCTGTACAAGCA  
AAAGTATTAGAAGAGCAGCACGCCATATTCGGAGAAGATTTGAAGAACGCAAGAGCTTCATATTTAAACCTTAAT  
GAAATGAAATATTTGGAGATGGTTATTAAGAAACGTTACGGTTAATACCTCCAGTTACTTTTATAGGACGGAAAC  
TAACAAAAGATTTAGAATTCAAGGGCACGTTATATCCGAAGGACTTGAATATTTTCTAATCATTATATGTTTCAG  
CTAACTAGTGAATACTTTGAAGAACCTGAAAAGTTAATCCTGATCGATTTGCTTCTTATGATAAAAAGATGCCCTA  
TGCATATACACCATTCTCAGCTGGCTCCAGAAATTGTATAGGACAAAAGTTCGCTATGTTGGAGATGACATCAGTT  
TTATCTAAGATAGTGAGAAAAGTCTTGGAGTTACTACCAGCTATTCCATCCCATAAACTTTCTCTAGCCGCAGAGATTT  
CTACTAGTGTCTAAAACAGGAATTTAAAATTTGATTAAAAATAGAACATAGAACATACACATTACTTAACAAAAT  
ACCCTAGAATAAAATTTAATACCTTTATTACCTTATTTAAAAACTTTTACACCTGTAACAACATTAATTGTCTTTT  
TACTTACATTTGTCCTAGTTTACATTGAAAATATACCCCTATTGGTAAAAG

> RferU22\_CYP4BG7

TCGGCCTGCGGTGCATCATGACGCTTCTCGTTCTCGTCGCCGTGCGAGGTTTTTATACCTCCTGAACCGGATCCTG  
CGTTATTACAAGACGTCCAGGATTCTATCGAAAGTCCCTCTCCCCGGGACATTGGCTTATAGGAAACATGGATA  
TAATATTAATAAATCAATCCAGATGATTTTTTCGATTTATTGAGGGATTTTACGAAAAAATATGGATCCATCTACCGC  
CTCAGTACCCCATATATTACAACAATCAATATTTCCGATCCTGGCGATCTTGAGATGATACTCTACAACCCAAGCA  
TATGAGCAAGAGTAAAGTGTATGGTTTTCTGCAAATTTGGCTTGGAGAAGGATTATTAACCAGCTCAGGACTGAA  
ATGGCAAAAAGGCGAAAAATTTGACCAGGGCATTTCATTTCAACATTCTTCGATATGTTTTTCGAGACGTTTTTA  
ATGACGAACTCGACAAGCTGACCAACAATTCGCGATATAAACAACGAGAACACGGTACCGGCTTACATCGAC  
GTGGTACCACTAATAAGCCACATGACGTTGAAAGCAATGGGTGAAACCTCCATGGGCATGAAGAACATAACCGAC  
ACCGAGGTGGTACTCTACAGGCAATCGATTATAAAATGGGAAAATTGTTGTTGGAAAGAATCGGCTCCCCCTTG  
ACCCGATTGTCCTTTATCTACAGGCTGACGAGGAATGGTCGCGAAGAGAACAGAACCATAACACAGCTGCATCAA  
TTCACTGATACCATCATCAAGCAACGAGAGAAGCAGATCCTGAATTTGGACAGACTGGAGCTCGCGTCTTCGTCAT  
ATTCCGAAAGGAAATTGATGAGAATGCTGGACCTGCTACTGCTGGCAAAAATCGATGACAACAGCATCGATTACG

AGGGTATTAGAGAGGAGGTGGACACGTTTCATGTTTCGAGGGCCACGACACCACAGCGGTCGCTTTAAGTTTCCTGT  
TGCATTCTCTGGCAGGATGAAGTACGTAGGGAGCTGAGGGAGGTGCTGGGAGACAAGCCCCATCCCACCTACGC  
CGATCTTCATCGTCTGGAGTACACCGAGAGAGTAATCAAGGAATCTCTGCGTCTATACCCCAGTGTCCCGTTTCATAT  
CCCCAATCGCCAGCGAGGATATCCTCACCTCGACGGGATACTTCTCCCCAAAGGCACCGTCTCCACATGCACAT  
ATTTCGACCTGCATCGCAGTTCGGAAAATATATCCGGACCCGCTGAAATTTCGACCCAGACCGTTTCCTGCTGGATAAC  
TGCTCGCAGCGCCATCCGTTTCGCTACCTGCCGTTTCAGCGCGGGGCCCGTAATTGTATAGGTCAGAAGTTCGCGC  
TGTTGGAGCTTAAAAGTTGCCTGTGCGGAGTGTGAGAAAATACAGACTAGAGCACGACGGCAAGAACGAGTTC  
AGGTTTCGCGGCAGATCTGGTTTTACGGACAAAGGACGCCATCAAGATTAATTTCTACCGCTGAGTAAGGTTAAA  
CTCGAGAGAACAGTACAAAACGAAAACCTAATAGCTACCTAATAAAACTTAATAGAATAATTATTAGAACCACTGG  
TTTTTTCGACCTGTGGTAATCGTACATTGCTTTTTATATACGCCAGCGCCATCTATGAAACGTCCCCTTAACCTCCTC  
GGTAAACAGGACTCTTGATTTTAGTACCCTTCTTGAGCTCACCAGTTTCTCATGGAACACAACCTGATCAATAACAA  
AAATTATATAATATTCAAGATGATGAATGGTGAAGTAAATTAAGAAATATATTATTAATGTCACCTTAGTTCATTA  
CAATTCG

> RferU27\_CYP4LC1

TGAAGATCTATGAGGATGACATTGGAGATTTTTAGTACCTTTGTTATGTTAGTTCGCTAGACTTGCTAGTACGTA  
ATTGTATCCATGGAAAAGTGTATAGTTACGCCGATTTCTTATATCTATTTTCGTTATCAGGAGAATATTTCAAAGCAT  
AACAAGATACATCAAGTGTGTTGCACTAGCTTACGCTTCCCGGACCTGAAGGCGCGCCCATCGTGGGATTATA  
CCAAAACCTTAGGGACAACAAGTTTTTAGAAGATCTGGGTACTAATGCATCCAATATTTTCGGCCCTATATTTTGAAT  
ATGGATATTGTTTCATGCCTTTTCGTTTTATCTACGAACCGGAGGACCTAAAAGCGGTAAGTGGCACATGGAAGAAG  
TCAGAGAAAAGCTTCTTTATAGGATCATGCATACGTTTCATTGGCGATGGCTTGATTACCAGTAATGGGGAGAAAT  
GGAAACGTAATCGGAAATTCATTACGCCGACTTCCAAAACAACCTTCTACAAAACCTATTACGAAATATTTTCCCGA  
TGTTCTCTTAAGTGTAGTACAGAATGTAACAACCGGCGTCAAGTCAAGGTAACGGAACCTAATCAATGATTGTGTAC  
TGGGTATTCTGCATGAGGCCATCTTAGGGTTCCATCGGGAGAGACAAGAAGCAGTCCATTTAGAAAGGGTGAAG  
TGCTACTGCTAAAAGGATATTGAAGCCATGGTTATTGCTTGATGGCGTGTAAATGCTCTGGAATGTCCAAGAG  
GGAGAAGAAGCAGCAGTCTGCATTGCATCAGTATGTGAAAAGGTTGCTGGATCAACGGCTGGATGACCGAAAAG  
ATAACCAAATCAATTGGAGTACCTGCCTCTTGATTACTTTCATTGATTTGATGGAAACAACCTGATTTTACTCAGGAA  
GACCTTCTCAACGAATGTGTAACATTTATGCTGGCGGGCCAGGACTCGGTAGGAGCAACGATAGCGTTTTGTTTAT  
ATTACTTGGCAAGGAACAGAGTATCCAGGAAAAGTTATTCCAGGAGATCGATATAGTAACGCGAAGTAATGATT  
CAGGAAAGATTGACATGGATCAGGTGATGAGGATGCCTTACTTGGAGCAGTGTATCAAAGAGACCCTTCGGCTGG  
CGCCAGTGTTCCTGTGATCTCCAGGGTATTGACAAAAGACGTGGGTTTAGCTAACTACGTTTTACCAGCCGGTTT  
GAATATATTCATATCACCATTTATGACTCACAGATTGCCACACATCTTCCCGAATCCTGTAGTTTTTGTATCAGATCG  
GTTTTCCGAAGAAGGATTGAAGAACATTCCTCCATACGCTTTCATTCTTTCAGTGCTGGTAGTAGAAATGTATAG  
GGTATAAATTCGCTTATCTCGAAATAAAAAATATTATCGCGATGTTGGTAAAAAACTATCGCTAACGCTGATATCT  
GGTAAGGATAACCTATCGTTTAGTTACAGAGTACCCTGAGAGCAAATTCAGGTGTAATGTTGGAGTTCGAACGT  
AGAGCTTAAGTATTCGGAATGTTTCATATAATGGTTTAAATTTTTCCAATAATACGGGTGTTCAATATGCGTATAGA  
GATGAATAAACTTTATGGAATTAGGAAAAAAGAAAAACAAGTACTCTGCGTTGATAACCACTGCTTCGAGA  
TAGACTTAGA

> RferU30\_CYP4KX2

GGAGATTTGTTTATTATTGGTCATTTATTGGAAGTTACATGTTCTCTAGAACAATGTTTTTGTGTTAAGAAGATG  
GAGTAAAACCTGAACACATGAAACCAATGTTTATTGGTAGGATTGGACCTTATTTGTTTCTAAATACTGCAGATCCG  
GATATCATTGAGGATATTATATCAGCATCAAACATCTGGAAAAATCTACTTTATACAGATTTCTTGACCTTTGGTT  
AGGAAAAGGATTACTAACGAGCACAGGAACCCTGTGGCATAACAAGGAGGAAAATACTTACGTCTGCATTTTCATTT

TTCGATTTTGCAAATTCATAAGTATATTTAACGAAGGAGGTGATAAATTGGTTGAAACTATAAAACAGGACGTC  
GAAAGATTCTGTTGATGTTGTACCGTTAGTGTCTGATGCCACTCTACATGGTATAAATAGTACATCGATGGGGCT  
AAAATGGAATCCATCGAAGGTGGAATTGAGTACAAGAATAATGTGGGAAAAATTACGTATTATTCTGCCTGGAGG  
TGTGTAAGACCTTGTTATTTAACACATATTTTATTACTACTTTACGTCTAACGGACGTAAGAAAGACAACTCT  
GCGTTCGTACACGCTTTTCATCGATGACTTGATCAAACGGAGGGCTGCTGGTTTCCAAGTTTTTGACGTTGACAAC  
GAAATATCATTTCGGACAGGGTAGGAAGAAGTTGGCCATGCTAGACTTGCTGTTGAACGAGAAAATTAAGAACAAC  
GCCATAGACAACCAGGGTATTAGGGACGAGGTTAACACGTTTGTTCGAGGGCCACGACACCACTGCTTCTAACT  
TATCTTTTATGTTGATGCTTTTGGCTTGCCATCGTGATATTCAGGATCAAGTGTACGAAGAATTACAACATATTTG  
GGTCCAGAGTTATCCAGAGAGCCTACATATGCCGATTTGCAAGAAATGAATCTTATGGAAAGGTGCATCAAAGAA  
AGTTTAAGGTTGTACCCTAGTGTCCCTTTTATTGGACGTATAGCCAGTGAGGATATTGTTACAAAAGCTGGAATCA  
TACCGAAAGGATTATCGATTAACATTCACATATATGATGTCCATAGGGATCCTCAATATTGGCCAGACCCAGAGAC  
GTTTGATCCATCTCGGTTTTTACCGGAGAATTGTCGGAACAGGCATCCGATTGGTATCTACGCTTTGTACGTGCG  
GGACCAAGAAATTGTATAGGACAACGATTCGCTATCTTAGAAATTAAGTCGATTTTATGTAAAATATTCAAGAACT  
TTATTCTGGAACCGATTGATACCCAGAATCTCTGGTACTAGTTCAAGAGTTAACTTTAAGATCCGTTAATGGTATA  
AAAGTTAAATTTGTACCAAGAATAAATAAGAACAAGTAATCCATATTTTATTATGCATTATTTGCTTTTATATGAAT  
TGTTTTATGTAATGAATGGCAACTTCTTAATTAATTGTTTCATTGTGAATAATTGTATATTACTGTGATTAATAA  
ATAGTACAATCTAAAACCAAAGAAACAGAA

> RferU35\_CYP4BQ9

GTGGGGACATGCTTACTTATAGACCGATTACTTGCATCAAGTCCAGCTGAAATGTTCTTAAATGTATTTTGTGCTC  
TGATCGCGACCATAGTGGTATGGTGGGTGAATATCTGGAGGAAACACAGAGTACATAGATAAAAACTTCAATGG  
ATAGGAAAAGTAGCAGGCATTCCCTTATTGGGAAATACAATGGAATTCAGGATCCTACAACAATGCTATTAAGG  
ATGGAGCAACGTCTTCTGGAGAATAATGGTTTATGTGCTATTCAAATACTCAGTAGGACTATGGTTCTGATTTCCG  
ATTACAATTTTGTGGAATGGTTGCTGACGTCAACGAAGATTTTGGACAAAAGTATCGATTATCAATTCTGTATCGA  
TGGCTTGAAGGTGGAATTCTAATTGCCGATGCTCCGAATGGAGACCAGGCAGAAAAATTTAACACCGGCCTTCC  
ATTTTTCTATCCTGAAAACCTTGTAGCCAAATTCAGCAAGCCTACTACAATTTTATTGATTGATATATTAAGAAGGAG  
TCCGACAAAAGATTCAAGTAAATCCACCCGATCATAGCTAATTTTACGTTAGATATTATATGTGAAACAGCCATGGG  
GGTTCGAAAATAACGCTCAAGAAAATCCTCAGTCAAGTACGTCCTGTTTCAAGTCCACACCATGTGTAATTTGTCGTT  
GAACGAGCTTTAATCCTTTGAAGACTAACGATTTTCTTTACAATTTTACATTGGATAATATTGCCGAACGAAAAGC  
TGTCAAATATTTACATTCAACGGCTGATGCGGTAATCAAGATGAAAAGAGAAGAACAGCARAAGGAAGAAGAAG  
AAGAAAATGATGACGTTGGCGGAAAGAAAAGGGTGGCGTTTTTAGATCTTCTTTCGCGCCATAGAGATGAAAATG  
GCCAACCATTGTCCGATAAGTGTATACGGAAACAAGTTAATACAATAATGTTTGTGCTGGCCATGACACAACGGCTTC  
AGCATTATGTTTCACTTGTCTGTCTATCTAATCATCTGGACGAACAGGAGAAAAGCATTGAGGGAAATTAAGAA  
GTTTCTCATGAAGAAGATACATTTACTTACAGGAATTTGCAAGATATGAAGTATTTAGACCTGATAATAAAGAAG  
CCATAAGGTTATATCCGTCCGTGCCATTTTATTTCGAGACGACTGACTAAAGATGTTGTTTATGAAGGTTCTAATGTG  
CTTGCCAAGGATATAACATTGATTATATGCGCACATGCCATTAACAGAAACCCGAATGTATTCAAAGAACCTGAGA  
AGTTTATACCTTCACGATTCTGGAAACTAATATTAACCATTTTCTTTTACCATTACGCGCAGGTCCTAGAACT  
GTATAGGTCAAAAATTTGCTATGCTTGAAATGAAATATGTGCTAGCAAAGATACTTGAACCTTTGAGGTGTTACC  
AGCGAACCCGCCACACAATCCGATCATATCCGCTGAGACTGTATTAATATCGAAAAACGGCATCAAACCTTCGTTTC  
AGGAATAGAAAATAACGTAGATTTGATTGTTACCTTGTCTTAACAGTACTGATTGTCTTATTTTATTATGTTTATT  
TCAGTATGAGCATTGTGCCAAAATAATTAATTATTAGTTGTATATTTGCAAAAATTTGGCTAATGAAACAAAAACAT  
GAAAGTGGGCGGTGATAAAAACTGGAACAACCTAGTGTATTTTAACTTTGTATTTGTCATCGTAGGATTAGATA  
AAAGCCAGTATTTTTCTTTTTCTGCTTTTGGTATATAATTGAAGAATTTTGTATAATATATAGTGTAGGAT  
ATAGCAAAATATTTGACTGCATCAGCCAAACAACCTCCTCCTAATGCCCTTCTTAACTTATCCTACGTGGCATTG

AACTTAATATATATGAGTTATAAATGTTATGATATATTGTTAATATAGTGAAATTGTTACAATATGTTTCTGTAATTA  
TATTTAATAACTATATATAACAATATATAAATATTACGAAATTTTATATCAGTATAATTTGTTTTGTTCTGTCGTTA  
GACTTGTAAGCATATAACATCCACTCTAAAGATATCAGATGTAATCATTAAAGGTGGACTTCAAGTTGACATTTATAG  
CCAACGTAAAGGTACAACTACTCTAGTTATCGCCATATAGCGTTTACCAGCATCACCAATAATAAGAGTAGAATA  
AGATTTCGTATAGGTGCTTTGATTAGTACCATATATTACTTAAAATACGAGGTATCAACGTAGACAAGTGTTAAAAA  
AACGAATTTAACTTATAAATTCGATGATTGCGATATTTCTCTACATAAAATATTTCTTTAATTTGAAAAATCTACTG  
CCGAAGCCCATCAAATATTTTTAGAAAATTATGGTGATGCTGCTCCAACATATCCCAATTCTTAGTTTTTAACGACAT  
AAGAATGTTAATAGCACCAAAAATTCGAAGGTAATGAATTCTACGACTTAGACTTATGGGAGGAACAGGCAGCT  
AAAATTTTCAAAGAATGTCCAGACTGTTTTTCATTTGTTGAATCAACTGTTTCTAGATGTTTCTAATATTCAGTTGAT  
CAGTGCAATATCACGTGGCTTGGCTGGTACAAAGTATCGAAATGCTGAAGAAGTACTAAAATTGATCGATGATTG  
TATAGCTGCCAACTAACATCCTTCTTTGAAAAAATATCACCATGTTGCCAGGAAGATGGAAAAAGTTGTGGAAA  
ATGATATTACTATATTTTGATTAACATATATTGCGTTAGTTATTATTCTCTTAGCAAAGAACCCTTTTTATAGTAAGAA  
TTTTAAGATAAGAATATATACTATAGCTAACA

> RferU40\_CYP4G186

ATTTCCACGAGTTGATTCTAAGATTGCCAGTGATAAAACAAACTTGCGGTGGTCTCAGTCGTCAATTGATGTTGCT  
CTAGTTGAGTGGTGATTGTCTGGTAGTTTTTACTCAGAATATACCTATCTCAGACATGTCGGCAACACTGTCAAGT  
CCTGACCAGATGGTCCCTACCGGACTCTACTCATACTTTTCTCTATTTGCTAGTACCAGCTCTAGCTTTATTCTACA  
CATATTGGCGAATAAGCAGAAAACATATGCTGGAAGTACTGAAAGAATTCGGGGGCCGAAAGTTGGCCGATC  
ATTGGAAATGCTTTGGAATTTGTAGGGACACCAATGAAATATTTACACGTATATATAGACGATCGTTTCGCATATG  
GTAAACAATCAAACCTTTGGCAGGATCCAGATTAATCATCTTCCTCACCGATCCTGATGATGTTGAAATTATATTA  
AGCAGCCATGTTACATTGACAAATCACCAGAATATAGATTCTTCAAACCTTGGCTTGGAGACGGTCTTCTGATCTC  
TACTGGCCAGAAATGGAGAGCACACCGAAAACCTATAGCACCTACTTTCCATTGGAAACCGTAAAGAAAATGGAG  
AAAGAAATAGGAAAGGAGTTCGACTGTCACGATTACATGTCTGAAGCCACAGTAGAAATCTTCTAGAAACGGCA  
ATGGGTGTCAGCAAGAAAACACAAGGACAAAGCGTTACGACTATGCAATGGCTGTTATGAAACTGTGCGAGATT  
CTTCATCTTAGACATGCCAAAATGTGGTTCCAGACCAGACATCATCTTCAACCTTACCAACACCGCCAAATATCAAAA  
GAAACTAATCAACGTGATCCACAGTTTGACTCGTAGAGTTATTCAAAAGAAGAAGGCCGATTTTGAGAAAGGTATT  
CGTGGTAGTACTGCCGAACTTCGGGAAGAACTGAAAACCAAAAACCTGAAAGGAATGTGTCATCGAAAACAACA  
ACCCTCGAAGGCACATCATATGGCCAGTCTACCGGCTTTGAAAGACTTGATGATCGAGGCATCCAGAACGGCGT  
GGTCATCAATGACGAGGAGATCAAAGAACAAGTGGACACTATAATGTTGAGGGTCACGACACGACGGCTGCTG  
GGTCCAGTTTCTTCTTTGTCAGATGGCTGCCATCCGGATATCCAAGAACGAGTTGTGCAAGAAGTACTAGACGAGAT  
TTTCCAGGGTTCCAGACAGACCAGTCACTTTGCTGACACCTTGGAAATGAAATATTTAGAACGTTGTTTGTGGAA  
ACTCTAAGATTATCCACCGGTGCCAATCATTGCTCGACAACCTTCAACAAGATGTGAGGCTTGCCTGATCCCAA  
GCTAGTATTGCCAGCAGGAGCAACCATTGTCGTTGCTCAATTCAAAGTTCACCGCTCACAAGAACAATATGGGCCA  
AATGCTGATGCTTTGATCCTGACAACCTTTTTACCAGAAAGAGCTTCTAACAGACATTACTATGCTTTTATTCCCTC  
AGTGCAGGACCAAGGAGCTGCGTTGGACGCAAATATGCAATGCTCAAACCTGAAAATCCTCCTCTCCACTATTCTGC  
GCAACTACAAAATCAAATCGAACTGGACAGAGGACGATTACAAGTTACAGGGTGATATTCTTAAGAGAGCTG  
ACGGTTTCAAATTTTCGCTGGAAAGACGCAAACCAATGAGTGCCACCGCCTAACCAAATCTAATTATCAATAATAT  
TGATTCTGTAGAAATGTAAGGTAGGTTAAGTTGCAATGATGTGAGTAGAGCACTATTAATATGTATTTGTAGTA  
TACCTAATAAAGATCGGGTTTTAATATAAAACGGTGTCAAAGAACAATAAAGTTCCAAAATAAAAAAAGTG

> RferU46\_CYP4LE1

ATTTACGGTCCGATATTTGAGGCACCATTGGTCTACGCATATAGTTTACTTATCCAAGGCTGAACATTTAAAGGT  
AATATTGCGGAGTTACACCAACATTAAGAAGGGAAGATCATACAACGCTCTTAAACCTTGGTTAGGAGATGGATT



GATATCTGGCGGCGGTGAACACTGGAAATTTTCATAGAAAAGTGATCAGGCCGGCATTCTATGTCACAGTCTTGGA  
TAAATACATGGACGTATTTTCCAATAACTCCAGTGAAGTGTGGATATTTTTGAACAGAAAGTGGGACAAGGATAT  
TTCGATGTATTTCTCTTATGACCCAATTTCTTTGGAAACCATAGCGGAGACTGCTATGGGTGTTAACTGAAGT  
TTATGAAAATCCAAGTTGGAGTATCCAATGCAATTTGAATTATCTGTATGTTGCTATCAAACGTATGTTCAATC  
CACTGACGCGCAACGAATTCTTGTCAAACCTGACGAAAGATGGAAAGTACTGCAAGCAACAACCTGGATATCATCA  
ACAGCTTCAATCGAAAGATTATCAGAGAACGACGAGAACACTACGAGAATCACAAGACGAATACAGATTGGATG  
AAAACAGTAAGACGAAGATGGCCTTCTGGACCTGTTGCTGGCCTGTCAGGAAACCAGCTCGTTCACCGATCAAG  
AAGTGGAGGAAGAAGTCAATACCTTTATGTTGCGAGGTCAAGACACCACAGCTTTCTCCAATACCTATACTCTGAT  
GGCACTAGGAAATAATCTAGATGTACAGAGAAAAGTTCAGAAGAGATTGACTCGATTTTCCACGGCGACGAGAG  
GCCCCTAACCAGCGAAGACTGTAAAAGATGGAGTATATGGAGAGGGTGTCAAGGAGAGCCTCAGGTGCTACA  
CGATCGTTCGGTTCATTAGTCGCGAGCTGGAAGAGGAGGTGGAATAGACGGTTTTTCATCATTCCAAAAGGCGT  
GGGCGTGCTGATGTCGCTGTACGACCTGCACCAGGACCCGGAACAATTTCCGAACCCGAAAAGTTCGATCCGGA  
TCGGTTCCTCCCGAAAACGTAGCCAAAAGACATCCGTTGCTTTGCTCCTTTAGCGCCGGACCAAGGAACTGC  
ATAGGTCAAAATTTTTGCATTCCGCGAGCGTAAAGACCACCTCACTCATATCTTGAGACGGTATAACGTGAAATGT  
CTTGAAAAAGCCC

> RferU49\_CYP4LD1

GCAGAAGTTGATAAGGATAGTGTGGAGATCTCGAAGCTAGTTTCCGTATATACACTAAATGTGATTTGTGAGGCA  
GCTATGGGATTACAAATCACAGATAAAGACGAAACCCATCTAAAATACATTAATTCTATTGAAATATTTCTAACAT  
TATTAGCTGTGATTTGTTTCGCCTCTAACTAAAGTTTATCCATAACTTACATTGACATATTATATAGGTAAAAAGAA  
GGAAAAATTGAAGACATATATTAATAACGAACCAGAAGTCAAAGAAACTCTCACAGAATCTAAAGAAAAACTCGT  
TTTTCTTGATCACTTAATAAAAACCAATTAATGGAAGACCCTTAAGTGACATAGAGCTTAGAGATGAGGTTAAT  
ACATTTATGTTTGAGGGGCATGATACAACGTCTTCAGCAATCTCTTTCTGTTTATATAATTTATCGTTCATTCTAGT  
GTACAGGAGAAAGTTTTGCAGGAGCAAAAGTCCCTTTTCGGTGCAGACCTTAAAAGGCTACACCAACGTATAAC  
CAATTAACGAAATGAAATATTTGGAATGGTAATTAAGAAAGCTTACGATTGTTTCCATCTGTTCCATTAGTAGC  
ACGACGATTGTCTTCGGATCTTAACTACAATGGAACAGTATATCCCAAAGGATTAACGTCCTTCTTATACGTATG  
GTATACACAGAAATCCAAAATATTACTGATCCAGATCGATTTATTCCAGAACGTTTTGAAAGCAATAATGGAAG  
GTTGCCATTTTCTATCTTCTTTTAGTGCTGGACTTAGAAATGTATAGGGCAAAGATTTGCCATGTTGGAACCTTCT  
CTCGGTATATCAAAGTGATACGCAATTTGAATTGAAACCAGCCAATCCATTCCATGAAGTTGAGCTTTTCGGCC  
GAACTAGTCTGATATCTGTAAATGGTATAAAAATATCTCTTCTCGGAGAAAATAAACCTTAATAGCTGTACATT  
TGTTAGTTATGTTATGTTGATTTAAGTAGACTAAATTGTTATTAATTAATAAATTGATAAAATAAATGATGTTCTTATCA  
CTTTGTTTTAACCTTTTCGTATTAGATGTGCTGTTTAATTAACTCTGGTGAACACGCTGAGTACTTATGTTAAGT

> RferU53\_CYP4Bfra1

GTTTTACTGCTTCCTTTCTATTAATTTTCGGTGTATATTTTTATTACTGATTAATAAAGCGAAAATCGAACAA  
GTATTTAAAAATGTCCCGGGCCCAAACCATTTTTCTTTTCGGAAATATGTTGGATTTGCTGGTGGTAGTAAAG  
TGTATTTCTGACAAGTAAAGTGTATTTACCGGTGTTGAAAACCTAATCTGGATGAATACGGAGATACAGTACTTAT  
TCACGATGGACATTTAGTCGGTTATTAATCACCGTTGATTATGAATTGACTGAATATTTGTATTCTCTACGGTAG  
AAATCAATAAATCTGATCAATACAAAATTTGCGATGGATGGCTTGAGATGGAATTCTGACAAGTTCTGGTAATAA  
ATGGAGAAGCCGAAGAAAAGCAATTACGACTTCTTTCACTTTTCAATCCTTCAAGAGTTTATTACATATTTGAGG  
AAGTCGGCATGAACTAACTAAAAAATTGAAAGAAATACAAAACAAAAGTGCATTGATATGACTAGCTTGCTAT  
CGCTTACTTTGGACGTATATGCGGTAATATTTAACGAATAAGACTAATTTTCGGCCGTTTATGTCAAAAACCTTGAAA  
GATCTATGCGCTATATTAGCAAGAAAATATTTTACCTCTTGATTCTAAATTATATCCCCTTACCTGGATGCACCACA  
AGGAAAAAAGCACTTAAAAGTAATTCATCGATATATCGAAGATGTGATACGACAAAGAATCGAAACAAAGAAGCA

AGAAAGTTTAAATTATCACGAAGATAACACTAACGATAAAAGTCGAAAAAAGCTGGCTTTCTTGGACCTTCTACTA  
AG

> RferU58\_CYP4BDfra2

TTAATTAAGAGTTACTAGTAAGAATTAATCATTATAGCGTTATCATTCTTAGTAGTAGGACAAGTTGTATAAAACC  
AATACTATCTATATAGATAGTAGTATACATAATCATAGATATTTAAACTCAAATTAACATCGAGAACAACATTAC  
AGTAATATTGGAATTTGTGCAGACATACCATGATTGTCATTATTTAGTGTTAAGTGTTATTGTGCTTATATTGTGG  
AGTATTTGGAGTAAACATCATATTAGGAAAAATATTTCAAATGTTCCCGGTCTAAGCCTGTACCGATTTTCGG  
GAATACTTTGGATCTTATAGCAGGACCTAAAGTATTCTAAAARCTATATCTGGTTGGATGGACATATTTGGTGAA  
ACAATATTAGTACATGACGGCCCTTAAGTGTCTACTTATGACTATGGATTATGATCTTACTCAATTTATATACAAC  
TCTTCTGATCACATAGACAAGGGATACCAATACACCTATCTTCATGGTTGGTTAGGCAATGGTCTTCTTACATCGAC  
TGGACTTCATTGGAACTGCATCGAAAAGCGATAACACCATCTT

> RferC402\_CYP4DV1

GTGACAAAACAATATTTTCTATCTACAATTGGTTTATCTCCGCACAAAAGGTTAATTTGTGAGTACGAGTCAATATA  
TTAACGAGCGCGAAAGTTAAAATTTACTATTAATGACGTTACAACGAGTAGATATAAATTAATCCTAAAACATTC  
GTCGTGCTGTAAACAGTTGCGATCATTCAATATCGCAATAATGCTGCTCGTTTTTCTTGAAGTTATTTTCGCG  
GTACTTGTGGTGTATTTTAGTCTCAAATTCTGGAGAGTGTATAGGATTAGAAAGCAACTAGAATGGGTTCTTCGG  
CTAAACGTTTGCCATTTATTGGAGCATTACTTGAATGGGAAATGACTCAACAGAGTTGATTTATAATTTACACGC  
CTTACTGCAAATCCTAAAAGAGTTGTTACATCGAGATAGGGTTTGATTGTGAGGTGTTAACTAGAGATCATGATT  
TTACTGAGTTCCTTCTCAGTTCGAACAAATTGATCAACAAGTCTGGGAGTATCAGATGTTGAGGATTGGTTAGG  
TACAGGTCTATTAACAGCTGGAGGTACAAAATGGAAGAAACGAAGGCGTATCATTACACCAGTTTTCCATTTCTCG  
ATTTTGAATCAATACATTGAATCGTTTGACTTAAATGGACGTAAGCTAGTGAAATATTGAAAAACGAAGGCACCA  
AACCAGATGGCGTCGATATATATTCATATATAACCAACTGTGCACTGGATATTATTAGCGAAAGTGCTATGGGCGT  
GTCGGTAAAGTCACAAGAAGGACAAAATCAACAGTACGTCGTCGCCGTAAAGGATATCCTATCCTCGATTTTGGAT  
CGATCATTTAGTCTTATTAATCGAACCTTACTTATTTCTTTTACTCCGGATTATTGGTACCAGAAACGTTTGGTG  
AAGATTCTGCATTCCTTACTAATAACGTCATAGAGAGCCGACTGAAGAGTCTACAAGAAAATGGCGGAGTG

>RferA\_c4897\_CYP4G15

GTCTTACGCAACGGAGAGCGTGGTGCAGTCCACAACATGGGCGGCCACGAGTTTGTCTACATGCTGTTGGTACC  
AGCTCTGGTGTGTGGTATGCCTACTGGAGGATGTCACGGCGGCACATGTATGAACTAGCTGAGAAGCTGGAGG  
GGCCCGCTGGCTTGCCGCTCTTGGGAAATGCCTTGAATTCACTGGCGGTTCTGCTGATATATTCAAGAACTTGAT  
AACCAAGAGTGCGCCGTACGACAAAGAGGAGTGGTGAAGATCTGGATCGGGCCTCGGCTGCTGGTGTCTGT  
ACGAGCCTCGCGACGTGGAGCTCATCCTCAGCAGCCATGTCCACATTGACAAGGCGGACGAGTACCGTTCTTCA  
AGCCTTGGCTTGGCAATGGACTCCTCATCAGCACAGGTGAGAAATGGCGGTCTCATCGAAACTGATCGCGCCGA  
CATTCCACTTGAACGTTCTCAAGAGTTTCATCGATCTATCAACGCCAACTCGAGAGCTGTTGTGGACAAAATGAA  
GAAAGAAGCCGGAGTATTGATTGCCATGATTACATGAGCGAGTGCACGGTGCAGATATTGTTAGAGACCGCCAT  
GGGTGTCAGCAAGAGCACTCAAGACCAAAGTGGATTGGAATACGCGATGGCTGTTATGAAGATGTGTGACATTCT  
GCACTTGAACATACCAAGATCTGGCTGAGACCAGAAATGATATTCAATTTACTAAATACGCAAAAAGTCAGACG  
AAACTGCTCGATATCATTACGGGTTGACTAAAAGGTCATTAAGAGGAAGAAGGAGGAATTCCAATCGGGCAA  
AAGCCTTCCATATTAATGAAACTACAGAAGTGAGACCAATGAGCCTACAGCCAAAACAACGTCCGTGGAAGGT  
TTGTCATTTGGACAATCAGCTGGTCTTAAAGACGACTTGGACGTAGATGATAACGATGTTGGAGAAAAGAAACGT  
CTGGCCTTCTGGACCTTCTTCTGGAAAGTTCTCAGAGCGGTGTTGTGATTTCTGATGAAGAAATTAAGAACAAG  
TTGACACTATTATGTTGAGGGTCATGACACAACAGCAGCTGGAAGCAGTTTCTTCTCTCTATGATGGGGATCCA

TCAAGATATCCAAGACAAAGTGATTGAAGAATTAGACCAGATTTTCGGTGATTCTGACCGTCCAGCCACATTCCAA  
GACACGCTAGAAATGAAGTATCTCGAGAGATGCCTGATGGAGACGCTTAGGATGTACCCTCCAGTGCCTATTATT  
GCTCGACATCTTAAACAAGATGTTGTTCTTCCATCCAACGGAAAGAAAGTACCAGCTGGTACCACGATAATTATCG  
CAACGGTAAAACCTCCACCGTCCGGCCGACATTTACCCCAATCCCGACAAATTTGACCCCGACAACCTTCTGCCAGA  
GCGCTCAGCCAACCGCCACTACTATGCCTTCGTACCCTTCTCTGCTGGTCCCAGGAGCTGTGTGGGACGTAAATAC  
GCCATGTTGAAACTGAAGATCATCCTGTCCACTATCCTGAGGAACTTCCGGGTACTCTCCGACCTCAAGGAAGAAG  
ACTTCAAACCTCAAGCAGACATTATCCTCAAGCGAGCCGAAGGGTTCAAAGTTCGGTTGACGCCCGCAAGAGGA  
CGACCAAAGCTTGCTAAACAGTTTTTAGGAAGCGCACTGATTATGAGCTTTAAGTGTGACGGAAACTCTGATTT  
TCATGAAATCTTCGAAAATTTTAGCACTTTATAGCATAGATTTATGAACACTGTATTTAAAAGTAACTATTTGATAT  
ATAGTTT

> RferC9515\_CYP4BD12

GTACATGTTGTTGTTTCTTCGCCTCGCTAAAATATTCAGATTAATTTTGAATGAACACTGATTTCAAACGATGTCGCT  
AGTGTTAATGTTTGGTTTTTCCATTGTCGTCTCATTGTTGGTAATATTATTGATAATTAGGCGACCGAAACGTACCA  
AAAAGTACTTGGAAAATGTACCAGTACCAAAAACAACGTTTATATTTGGAAATGCGTTAGATTTTTATGAAAAATCA  
AGAATATTTGCTGTCTCTAAAAAGTATTTGGATGATTATGGAGATACTGTTGTAATCAGAATTGGTCTTTTCAGCA  
AGTTACTGATTACTGTTGATTATGAATTTTCTGAATTTTATACAGCTCAACAGTCGAAATAAATAAATCTGACCAAT  
ACAAAATAATGTACGATTGGATTGGAAAAGGGCTGCTAACAAAGTGCAGGATACCAATGGAGAGCTCATAGAAAA  
GTGATAACACCATCTTTCCATTTTTCGATCTTGCAAGATTTCTGTGAAATATTGCAACAAGTGGGCAATAGATTAGT  
CGATAAGCTAATGGGCACAGAAGGCCAAAAAAGTGTAGAGGTCTTTAATATAGTATCCAATATGCACTTGATGT  
GATATCTGAAGCTGCAATGGGAGTAAAATTAATGCGTTGGAAGATGATACATCTATATATGTGAAGAATGCCAA  
GGATCTTTGCAAGATTTTAATCAAGAAAAGCATTTTTCGCCTATCAATGAGAAGCTATACCCACTTACTTTTCATGCACT  
ATAAAGAACAAAAACATTTAGATGTTATCCATCGTTATGTGCGAGAATGTTATACAGCAAAGAATCCAAGAAAGGG  
AAGCTAAACTAATAGTTAGTGATGAAACTAAAAGTAACACTGGAAAAAGAAAAAGATTGGCATTCTTGACCTAT  
TGTTAGAAGCTAGAATCGATGGGGAACCTTTATCTTTAAGGGAGCTTCGTGATGAAGTTAATACATTTATGTTCGA  
AGGTCACGATACAACCTGCCACTACAATATCATTTTGTCTTTATTTGCTGGCAAACATCCATCAGTTCAAGAAAAAG  
TACTAGAGGAACAGTATGCCTTATTAGGAGATGATTTGAAGGGTGTCAAAGCCACATATGCCAACCTCAATGAAAT  
GAAATACTTGGAGATGGTTATTAAGGAAACACTGCGATTATACCCTCCCATTCTTTTGTGGACGAAAGTTAACA  
AACGATGTGGAATTTAATGGGACGATATATCCAAAGGATATAAATATTTTGTGTTACAGTATTATGTCCACCGAC  
AGGCCAAATATTTTCAGGATCCTGAAAAATTAATCCAGAACGTTTGCATATTCTGAAAGGAAGATTCTTTTGTCT  
TATATTCCTTTGCAGCAGGTTCTAGAAATTGTATAGGACAAAAATTCGCTATGTTAGAGATAACATCGGCTCTCTC  
GAAAATCGTTAGGAACTTTGAACTGATTCCTGCCATTCCCAAACATGATCTTGAAATCACTACTGAACTTGTCTAG  
TTTCGAAAATGGCATGAGAATTGCACTTAAAAAGAGATTTAATGTATAGCATAGATCGGAAGAGCGT

> RferC18014\_CYP341Sfra1

TAGTGCTATACAAATTTTGAATTAATAGTATATTGGATACGTCATATTAATATAGGGATTTTTTCGAATATGTTGTG  
GCAAATATGTTTGAATTTGATCGGGATATACGCGATGTTTCGTTGGAGAAATAGAGAATTTAATAAGATTGCAGAA  
TACTTCCAAATAAAATGAAACGGGTGCCGATTTTGGGACATGCTGTACATTTCTGGGAAATTCTAAGAACGTA  
TGCAAGTAATGAAGGCAATGGCAGAAAATGCGATGAACAATAAAGAAGGGATGACTAGTGTATGGCTCGGACAT  
AAATTTTTTGTATAATTGCAGATCCGGAAATTGCTGAAGTGGTTTTAAAAATGTGTTTAGAAAAAGATAACATGA  
TGAGATTTACAAGTGTGCTAATCGGTAATGGCAGCATTTTTCGCACCAGTTAAAATTTGGCGTCTAGACGGAAAAAT  
TTTAGCTCCAACCTTTGGAACGAAAACCTA

> RferC26591\_CYP433A3

ATCAAACCTACCTGCAATGCTAAACTTCAGCATTTTTATACACGGTTCCATCACAATCCGCAATATTACCCAAACCCA  
GAAATATTCGATCCTGAACGATTTCGCCAATTCGAAAAATATTGATAAAATGACCTACTTACCATTTGGAGTTCAACC  
CAGACAGTGTGGGAAAGAACTTTCTATGTTAGAAATGAAATGTGCCTTATCGAAAATAATACGAACTTACGAG  
ATTATAAACATCGCAGAACATCAATTGGAGATCAAACCAAACCTTGTGTTATTTCTATATCTGGTATATGGGTGAA  
GATTCGAAAACGGTATAAGAAAGTATCAAAATTAGGTTTAAATAAAACTACAGAG

> RferC32960\_CYP341Sfra2

TAAAGGAGTCACTGAGATTATATCCGCCAGTGCCAGTTGTTGTCAGAGCGGTGGACAAAAACATTACTTTACCGTC  
AGGAATAACTCTGACTAAAGGCGTGTGCGCCCTGATCCATATTTGGGCAATTCATAAGAATCCAAAGTATTGGGGT  
CCAGATGTAACCTCGTTTTAGACCAGAAAGTTTTCTCGAGGGCCATTGAAACACCCGTGTGCCTTTGTCCTTTCA  
GCAATGGATCTAGAATATGTTTAGGTTATCAATACGCCATGATGTCAATTAACAGTCATGGCACACCTGATACG  
ACGGTATAGAATTTTACCAGCAAAAGTACCGAACGACGTCAGAAAAGCGATGGAATCTGATGATGATGACGCTCT  
ACCTTAACTATGAACCTTATGATAAAGCATGCAGGCAATTTGAATTACAATTAGAATTGAGGACTTAATAGGTCT  
TCGAAAGGTTTTTATAAACACCCAATCGGCT

> RferC35523\_CYP433A3

GGTAGTTTGATATTACAATATTGTAGATCTTTGGTGATTCTTTTTCCAACCTGAAGGAACAATGCTGTATAGTCGTAA  
AGTTTCCTAATCACCATATCTAGATAAACCATTTGTTGAAGGACTTCATAATCAATTTGTGGACTTTCCTTTTTAAA  
AAGTTGCTGTTGCTCATTTAAAAGCTTTTTCTGTATGTCAGTGTTTTTACCAATTTCATAAAGGGCCAAACATATTGC  
GGTTGAACTAGT

> RferU3\_CYP412B1

CATAGGTTTGAGTTAGTGTGTTAACTAACGTTCCGGTACTCTTACTGCTGTTGTTCAAGTATTTTACAATAAAAAG  
AAACATGATGAACTGGAAAAATATAGCTTTTTACTGTACAATTTGAAATAACAATCTTACTGTCCGTAGTAATAT  
TCTTTGTAGCGCTATATGGAAATNNNNNNNNNNNNNNNNNNNNNNNNNNNNNNNNNNNNNNNNNNNNNNNNNNNN  
TATGGTTAGACCTGAATACATTTACAGTATATCACAAAATTACAAGAAAAATATCCTGATGGAGGAAAAATTTGG  
TTTGATCGAAACTAGTCTATTTTCTACATAAACCGGAACATATAGGGAAGATTCTTGAAGTCAAAATTAGTAA  
AAAAGGATGAACTCTATAGCCAATAATTGAATGTATAGGTGAAGGTCTTTAATAGCACCAGTCGAAAAATGGC  
GCAAACATCGCAAAATGATTATGCCATCATTCCATCAAAAAGTTTTGGATCAGTTTGTGTAGTATTTGCTGAAAAA  
TCGGACATTTTATACAACATCTTGAATAAACATGTTGGGATAGAAATAAATATGTATGATTTGCTTACAAAATGCAC  
ATTAGATACAGTATGTGAAACCGCAATGAGATTACAATAACATTCAAATAGAAAAAATAACTACAGTTACATA  
TTTGACAAAATAATGTTGCTGACTTATCTGAGGATTTTTCAAATATGGAACCACATTTATTGGATATGGAATTTTT  
GGGCTATGAGAAAAAATTACAATCGTATCTGAAAGTATTTAATAATTTATCGAATAAAGTTATTCAAGAAAAGCTA  
GAAGAAAGACAAAACAATGTTGAGAATAAAAATGAGGTAATACTCAATGGAGGAACTAAGAAGCGTATGGCATT  
TTTGACTATATAATGAAAAATGAAAGCTTACAGCCACCGAATAGAGATGAAGTCAATATGTTTCTTTTTGCA  
GGAACCGATACCACATCTTCTACGCTGTCTTTGTATTTGCTATGCTAGGAATGTTTCAAGATGTTTCAAGGACAAAGT  
TTTAAAAGAAGTATTAGATGTTATTGGACCTGACAGATATGCAGAACCTCAAGATCTTCAAATCTACAATATACA  
GAGAGGGTAATAAAGGAAACATTGAGGTTATTTCTGTGGGAGCTTTTTTTGTTAGATCAGTAACGGAAGATACG  
GATGTTGGTGACTTCGTAATACCAAAATTTCCACTGTTTATTTTGGTGTAGTTTATATACACAGAAATGCTAAATA  
CTGGCCTAATCCATTGAACTTTGATCCAGACCGATTTTTACCCGAAGAAGTAGCAAAAAGACATCCGTGCTGCTAT  
ATCCATTTTCTATGGGCCTAGAAATTGTATAGGAAAGAATTATGCCATGATGAATATGAAAGTTCTTGTATCTAC  
AGTTTTAAGAAAGTTCAAATAACATTGCGCATACAAACGAATAGAAGATATTAATTGAAAACCAATATAGTGCTG  
AGATTCAGAGATGGTGCTAAAGTATCAGTTACACCACGTATTAATAGAGCTAAAATATTCAATCAAATTTTAAAT

AAGGCGTATATGTAATAATAAATAAAATAAAAACAAGAATAGTAACTGTAAATAAATAACACGTGTTATACAAGAC  
TTATAAAGGACTAAATATTTTTACATTAATAAATAATATAGCATTTTAAAAAAA

>RferU8\_CYP349

GTGGCAATTAAGCCAGCAAATGGAAGAGGAAAAGAAAAATAAGGATATATATTATGAAGCAGCAGAAGGGCGTA  
AGCTTCTAACGTTTATTGACATGCTTCTGAAGTTACTTATGAAGATAACAAAAGTTACTTTACTGATGAAGAAATA  
GTAGATGAAACAATTACTTTAATGGGAGCGGGCTCGGACACTACCTCTAACACTAATGCATTTGCATTATCTTGTTA  
GGCATGCATCAAGATATACCGGAAAAAGTATTAGCTGAAATCTTAGAAGTGGTAGGCCTGAGAAGAGATGTATGT  
CTGTGGATGATTTGGCACATTTTAAAATTTTTAGAAAGGGTYATTAAGAAACACTTAGAGTATTTCCAGTTGGTCC  
CATTTTGGCTAGGACTTTGGACGGTGACATTAATGTTGGCGATCATGTACTTTCGAAAGGCGGATCGATCTGCTTG  
GGAGTACTAAGATTACACAGGAGTGAGAAATATTGGCCTAACGCCTTGAAATTTGATCCCGATCGTTTTCTCCAG  
AAAATGTTGCAAAAATCCAACCAGGCTCATATGTACCGTTTTCTACGGCCCCAGAAATTGTTAGGGCTCAGATA  
CGCAATGATGACTATGAAAGTTATATTAGCAACAATCTTACGCAGATATAAAGTATTTACTGATTATAAATCTATAG  
AGGAGATTGATATAAATGCAGTGTATGACCCGCCAATTAATGTTATAAATTATATTACGAATCAAGAAAATA  
GTAATAGCCTCCTTCGAGATGGTGTATTTGGGATGGTCTTAAAATGTTTGATGGAATAGTAAATACATAATA  
ATTAGCGCCTAGTTTTAAAATTTTTGTTAATAATTAACAATGTATCTTTTTACAAAAGAAACAGAACAAAAGACA  
AAACATGTCGGCCGCTCGGTCTCTAGAAT

> RferC23468\_CYP15A1fra

ATTGTCTTTGTTGAGGGTAATCAATGGAAAAATCAACGAAAGTTTTCTCTACATAGTCTCAGGCAATTCGGTTTGG  
GACGTAAAATCATGGAGGAACAAATTCGAGAGGAATGCATGTTATTGATCGAGAATTCAGCAGTCAATGTAAGA  
AACCGATATTGATGGATGACGCCTTTGGAATTCCTATTTGAATGTTTTGTGGATAATGATTGCAGGGAAACGCTT  
TGATACTGATGATAAAACG

> RferC30851\_CYPfra

GACTTTTCAGTCAAAAATCAATACCAAATGGCGACGAAATAGAAAATTTATTACACCAGCCTTTAATTCACAAATG  
TTAAATAGTTTTATGGAAGTATTTGTTCAACGATCTAATGAACTAATTGAATTTATGAGACAGTATGAAAAGAAAA  
AAGATGTTGATTTATATGATTTCTTTCCCGATATGCATTAATAACAATTTGCGACACTGCAATGGGAGTTAACATA  
GACACAGAACCAGAAGGGGACAGTTTTAACCATTTGGATAGAGAGAGCCCTGGAAATATTAATAGAAAGGATATTT  
AATATATATTATCAAATTGATATTATTTCTGCAATTCAGCATTAGGCAAAG

>RferC4152\_CYP410

ATTATCTAAAATGTATACCGTCTGACCATTTACTCTGTGCCGTGTTATATTGTTTAAATTTATATTTTATTAATAA  
TATGCCAAATGGGATATTATCAAATCTATATGAAACATAATGGTCCCAGATATTTCCATATTTCCGAAATATCGT  
TTTTCTGGAAATAATGTACTGGCAACATATTTGAAAGTCAGACGTGATTATGGAATGCCTTACGCTATCTGGATT  
ATGATGATCTTTGTTATGCTACAGATGATCCTAAAGAAATTAAGTGATTTTAAACCATCCAGATTGTTTCAACAAA  
GCGACATTTTACAGTAAAGTAGTTGAATCATGTCTTTTCGATGGGTTTCTTTAATACCTATATCAGAAATTGATAA  
ATGGAAGTTATACAGAAGATTTGCGGCGAAAAGCATGCGACCGGCAATGTGGAAAGACTTTTTGCCAGTTTTCCA  
TGAATACAGTCAGCGTCTAAACCGTCTTCAAAAAATCCAAGCAATTTACCAATTCGACGATTTTTTCGCTAGCT  
TAAACAACATCGTTTTCAAACCTTTATGGTAACTTTTTGGGAATGGAAAATTACCATATGAGAGACATCGATAAC  
TTCCTACAGGAATTCAAAACCTTTAGCAGTTCTCGGACGAAGAACCCTTTCAACGTGTTATTTCCGATATTTCC  
TGGAATATCATAACAGAAAATGGCAAGGATTTCTGCAATATAATCAATACCATTGAAACGAACAATGATACTTTG  
AATAGTACCAAATTTCTAAATAGCTATCTACAAGACGAAGGTACCGTATTTACAGACGAAGAGATATTCCACCAAG  
TATATTTCTGGCAGCAGCAAGTACTGAAACATCAGCTTAAAGCGTCTGTTTTATTTGTTGCAGCTTGGTATGGAT

CAAGACGTACAGGAGAAAGTACATCAAGAAATAATTGATTTACTTGGTACGGATAAAGAAATTGCTCTTCAGGAC  
TTGAACAAACTTAAATATACTGAACAAGTAATATTTGAAACTCTAAGAATCTATCCAGTATTGCCTTTCTTAGGACG  
CCAAGCTACATCAAATATACGTTTAGATGGAAAGATTATCCCAATGGTACTAATATCATTGTTTCACCATATATGA  
TACATAGAAATGAAAAATATTGGCCTGATTGTGAGAAATTTAATCCTGAACGATTTAATGCAGAAGAATCAAAAA  
TATTGAACCTGGCTCATTTGTACCATTTCTCTTGGGACCTAGGGATTGTGTGCGGTCGCCACTATGGCATGACGATGA  
TGAAGGTATTTTTAACAAACATAATAAGAGAATTTAGAATTTGTTGCGAGAAAACAAAGCATCGATGATATGAAACT  
GAGTTACTACATTACGATGAAGCCAACCAGCAATGTGCAATTTACAATTCATACAAAGAGCTCCAATCATTAAATATT  
TTGTTTCTATCAATAAATTAACATATGAGACTATTTTTACTAAAATGAAACATGTATAACATTATTGAAGAATGCAT  
TTCAACACTTTATTATGTACATAATACTATAATGTTTATTTGTTTCAGCGCTAGACCTATTTTCTGTCATCCACTTGATG  
GTGTTTGGTCTGACTAGTTGGATTCTGGACTTTTAAAATTTACTAGGTGCGTCCAATTCACAATTTTTTATCAAT  
TTGAAAATTTACCAATTTCCAATACTGAATGACATTCTGTAACATTTTGCTATCAAATAAAGACGTAAAGTAA  
TCTGGAAAATAATATATGACTTCGTAAAAATAGCATATTGCATAGACCGATAAECTTCAGGCTCCGCCTATCCAAAA  
ATGATCCTTCTAAATTTCTAACTTATACAACCTACATTATATCCGAACAGGTTTCCTTATATATTAATTAATCACG  
TCAAATAGATAATCACATCAAATAGAGGAATAAAAAATATAAAAAACAAAAAATGAGTAATAAAATCCACTACTCAC  
CTACTATAAAAAGAGAAACAGAACAAGATATGACGGAAAGGGTTTCTAGCAGTCTCTAATATCCTCAGTGAAC  
AATATACCGGGTTGGTAAAGTATTAAGAATTCAAATTATCTTCAAACCATCCAGGTAGATGCGAAAGTTAAATT  
CAGAAACCAATAGTTCAGATATAAACGACCGCATAAGTCTCAAACATAAAAAATTGTTGTTTGCATTTCAATAAATG  
GAATAAAATATAAGTATATGCTTTATAAGAGAGCTTTGGTATGAATATATAATAGTTACAGTATATCGAAGAAGAG  
ATTCTGGACGCAAT

>RferU4\_CYP306a1

CAAAGAAGAAAATTACCACCAGGGCCCTGGGGTCTTCCGCTAGTCGGATATCTACCGTTTCTCGATCCCAAGGCTC  
CCCAAGTAAGCCTCACCGAACTCGCTAAAAAATATGGTCCCATGTACAGCTTATTGCTTGGTAACGTGCGTACCAT  
CGTACTCAGCGACCCTAAATTAATCAAAACCTTATTCGCTAAAGACGTAACGACAGGAAGAGCACCGCTGTATCTC  
ACTCATGGCATAATGAATGGTTACGGTATAATTTGCGCCAAAGGCGATTTGTGGAAAGACCAAGGAGATTTGTC  
CATAATTGCCTTAGACATTTCCGGCAGAGTACGCGGGTTGGCCTAGAGATAATATGGAGTAAGCTCATTATTAA  
ACACGTTAAGGAATTTGTGCGGTATATCAAGACATTAGATACAAAACAGCCTATAGATCCTTTGAGACCACTAAGA  
CACTGCTTGGGATCAATTATAAGCGAAATTGTGTTTGAAGGAGCTGGGAACGTGGTAACGAGACATGGGAGGA  
GCTTCAAGAACCTTCAAGAGGAAGGATTAATAATATTGGTATAGCTGGTCCATTGAATTTCTTACCATTCTGAGGT  
TTTTGCCGATGTTTAAAGCGACCAATGTCTTTCTGATCTAAGGCCAACATAAAAACGCACCGATTTTACCAAAAACCTG  
ATCAACGAAGAAAATGTATTGTTAAATAAAAGTAGATCCGCAGACCTTGACACCAATAGCTACACCAACTTGATAC  
AAGGTTTTCTTATTGAGAGAGAAAAAGACAAAATACTGACGACGTGCATAAATATTACAACGAAAAGCAATTCC  
ACCATTTACTGGCCGACGTATTCGGCGCTGGATTGGATACTACTCTGGTCACCCTCAGGTGGTTTTTATTATACATA  
GCAAGGAATGCAAAAATACAATCTCAGTTAAGAGATGACTTAAAGACTATTTTAAACGACCGTGATCCAGCCATTA  
CGGCCGGGAATCCCTTCCATTTGTGGAAGCCTGTCTATCGGAAACTCAAAGAATTTCGATCAGTTGTTCCAATTGG  
TATTCCACATGGCGCTTTGGATGATATTAAGCTAAATGGTTACGTTATACCAAAGGGTGCCATGATTGTTCTCTAC  
AGTGGGCCGTACACATGAACGAAAAAGTATATCCTGAGCCTGAAAATTTAATCCAAGTCGTTTTATCAATGAAGA  
AGGACGATATTTCAAACCGAATATTTTATTCCATTTTCAAGATGAAAAAGAATGTGCATTGGCGACGAGTTAGCC  
AGAATGATGATGTTTTTGGTATCTACTACTATTCTGAAGACGTTTCATTTAGATCTTGAAGATCACAAGACGTGTAT  
GGAAGGTGAAAGTGAATCACTCTATCACCACAACCATACAAAATTAATTTTTTCAGAAATATAATTTTTTATAAG  
AATATACCTTCACAATTATATTAATAAATTTGTTTCAACGTTTAAACAAGAAAAAAA

> RferU23\_CYP305F1

GCCATCGTATCGCGCTGACTTACGGACGGAAAAATCGTACAATGCTTACGATAATACTATCTATTGTTCTCGTAGTT  
TTGTTGCACGTGTGGTGTTTTTTTCAGTGAATGCAAGAAACCAACAAATTATCCTCCAGGACCTCCGTGGTTACCTTT  
CCTCGGCAGTCTATTTTCAGTTGAGGTCGTTAAGTAAAAAGCGGGCGGCAGCACGTGGCTTTGATGCAACTGAC  
GAAAAAATACGCCTCGGATGTGATAGGATTGAAATTAGGGTCCGAGTACGTAATAGCCGTATGTTTCGTACGCCTC  
CGTGCGGAAGATCTTAACGTCGGAGGAATATGAAGGACGTCCCGACAATTTCTTTTTCCGATTAAGATCGATGGGT  
ACCCGGAAAGGTATAACGGGAACAGATGGTGAATTATGGAAAGAACAACGAGCTTTTCTAGTCTCTCACCTCAA  
CAGTTGGGCTTTGGAAAGGACAATGTAGAACAGATGGTTAAAGATGAAATCAGAGATATTATAACAAGAATGGA  
ACATAACTTAAACAATGTCAATATTGCAGAGGTTCTAGCACCATCAGTATTAATATTTTATGGTATTTAACAAGTG  
GCAAAAACTTAAGAGGTAATCAGCGTGTGACTAATTTGCTAGAACTCTTGACAGAAAGATCTAAAGCATTGACAT  
GTCTGGAGGTATGCTCAATTTATCCATGGCTAAGGTTTCTTGCCCCAGATAAAACGGGGTTCAGCTTGTGCAA  
AAGATCAATTCAGGTATTAGCGACTTTATTAGCGAAGCTATTGAGGAACATAAGAAGTCCTTGATTGATGAGGATA  
ATAGTGATGTAATTTATGCATATTTAAATCAGATGAACAAAGGACCGAATGGAAAAAGTATTTTACAGATGATCA  
GCTGGTAATGGTTTGTAGACATATTCTGGCTGGATCAACTACTACCACTAACACAATCAATTTTGCATTGTTTGC  
TATGACCCAATATCCTGATATACAAGAAAAAGTTTATAAGTGTATTGAAAACCAATTTGAACCTCAATGTGAAATCT  
CATATAGTGATAACAACGAGTCCATACATTGAAGCAGTATTATTAGAATGCCAAAGATTTTTCTGTGGTGCCA  
GTGATTGGACCAAGAAGAGTCTTGAAAACATGCCAACTGGATAACTATCAGATCCCAAAGGATTCCACTATATTA  
TAAATATCTATGCTGTTTCATCACGATCAAGAATATTGGCAAGATCCCGAAGAGTTTAGACCTGAAAGATTTTTGGA  
TAACCAAAATAAACTGATTGGCCACGAAAGAGTTCTAACTTTTGGATTAGGTAAAAGAAGATGTTTAGGCGATGCC  
CTAGCGAAAACGTGTGTTTTTTTGTCTTTGTGACGATTCTGAGAAAGTTTAAATTGGAAGCTATAACTAAACAGA  
GCGAATTAGATGACAACATAGCAGGGATCAACATGAGTCCACAAAAATATAAAGTCAAACCTTACACCAAGAACAG  
TTAATCAGTAGGATTAATAGCAAGATTTTTTACAATTATGTTATAATCAGTATGAATAATGATATTAATATTTATTT  
TAATAACAATTGTATAATATTTTATAAAAGTTTTAACTTATTATAAGAGCAATATTATTTTCGTGATAGTATTGTGTA  
ACTACTGTTTAGTATTAGTAGTAAAAAGTTATTAGCATTAAATAAATAACATAGTTTTGTAATGTCTCCCTCACTT  
GTAAATATTTATCTATTATAACTTTTATATTTCCGGAATTGTTTTATCTAACTT

> RferU36\_CYP18A1

CTCAAGAACACTGTTTAAAAAATAGCACGGTTGCACTCGCAAAAAGAAACAAAAAAGAGTGAGAAAGACAGAC  
AAACAAATAAATATGTTTCGTGTATAGTGCCTCGTACTGTGGAACGCGTTAAATGAAGACGCGACCAGGAAGATC  
CTGCTAGTGTTTCGTGTCGTGTTACTGATCGTCCGATCGCTTCAATCCTGGCTGGAATGCAGGAGTTTCCCGCCGG  
GACCGTGGGGATTGCCGTTTTCGGTTCTCTGTTGAAAATTAAGGTGATCTTCATCTTTTCTACCGCGACCTGACG  
CATAAATACGGTTCGTTGATATCCGCGAGACTTGGCTCGCAGTTGATTGTTGTTTTGAGTGATTACAAAATGATCC  
GTGACGCGTTCAGGAAGGAGGAATTCACGGGCAGACCAATACCGAGTTCACCAACATCTTAGAAGGTTACGGCG  
TGATCAATACCAAGGAAAGCTGTGGAAAGACCAACGACGGTTCCTCACGATGGTTTACGCCATTTCCGGTATGTC  
CTACTTGGGATCGCGCAAAGCCCAAATGGNAAAAAGAATTGTTAGCGAAGTGCAGGATTTCTTACTATTCTTAAA  
GCAAGCAAGGGTCAGCCGATAGATCTCAATTCGTCCTGGCTGTATCCATTTCCAATGTTATATGCGACGTGCTGA  
TGTCGGTAAAGTTCTCCATAACGACGCCAGATTCATCAGGTTTCATGGAGCTCATTGAAGAGGGCTTCAGACTATT  
CGGTTCTTGGAGTACGTGNTTTTATCCCGATCCTGAAATACTGGCCCGGTCACAGTTACACCCGTCAAAAAATC  
GCCAAGAACCGTGAAGAGATGGCTCAGTTTTTCCAAGAAACAATTGACGAACACCGAAGGACATTTCGATCCAAGT  
CATCTTCGCGATCTTTTGGATACCTATCTGTACGAAATCCAAAAGCAAAATGAGGATGGAGTTGGACATAATTTGT  
TCGAAGGAAAAGATCATGATCGTCAATGCAACAGATCATGGGTGATCTTCTCTGCTGGCATGGAAACCATTAA  
GAGTTCTTACAATGGGCTGTCTTATTTATGTTGCACAATCCTGAGCATATGAAGGCCGTTCAAGAAGAACTGGAC  
CAAGTCGTCGGTTCATAGGCTACCAAAGTTAGAAGATTTAGCTTATTTACCAGTGACGGAATCCACGATCCTGG  
AAATTTCTCGGATCTCTAGCATAGTTCCAATGGGAACCACTCATGCCCAATTAGGGATATAAACTGAATGGATT  
CCTATTGCCTCGTCACGCCCAAATCGTGCCGCTGCTTACGCGGTTACATGGACCCCACTCTCTGGAAGGAACCA

GAGAAATTCGACCCATCCCGATTTATCGACGGAGAAGGCAAAGTACACAAACCCGAGTATTTCTTGCCATTCGGAG  
TGGGCAGGAGGATGTGCCTGGGGGAGGTTCTTGCCAGGATGGAGATCTTTTTATTCTGTCTCCCTGCTACATTC  
TTTTGAAGTTAGTGCACCCGATGGTGACACCCTGCCAACCTGAAGGGTATCGTCGGAGTCACCATCAGTCCTACA  
CCATACAAAGTGTGCCTCAAGCCGAGAACGATTGCATGGGAGAACGAGGACGTGAACCTGCGGCCAGCAGGAAG  
TCACTAGACTTCTTGAACAGTGTTCAAGAGCACGGTCAAAGAGTGGTTCCTAAGTGAGGCACAGTACTTAAGCAG  
ATTCAACAATATATAAAATGGGACGTTTTCGTTTCGAAACGATCCTTTATTTGATCGGCTGTGCATTTAAAGTGTTC  
TATTCACCGCCTTTAGTATTAGATATATTGTAGTACAATTGCTAGTCAGGCATGTTTCATCAGTTTTACCTAGTTTTGC  
AATTCATACAAGCCATAGATTTTTACCATTTGACTTGTATTGTTGATTANTTTTTTTACTTTATTTCGTAACCA  
TATTTGTGTGGGGTTGTGAGTGCTACTTTGTTACCGAAACGAAACCATATATTTTTAGATTTAGACTTTATTTATTGT  
AAAGTAACGAACCGTGGTTCGGTTTTCTATAGAAACCCTCCGTACGATATCAACAATTTATACACGCAGATTGTATCA  
TCCATATTCATCATCGTAAATATAATTAACGTTGAAATATTTTGTCCGCAATTGTGCTTAAAAAATTTTTGTTTT  
TTTAGAGAGCAAGACTTTATATTAAGATTTGTTATTTTAATGAGTTTTAATAAAATATAAGTTAAAAATAAAAGAAA  
CAGAACAAAAGACAAAAGTACTCTCCGTTGATACCACTGCTT

> RferU16\_CYP12V4

AAAAATATACACGAAGCGTCTAATATAATACGTTAATACGTATGAGATAAAACCATCTGTTTTCGAGAACAATG  
GCAACTAAACAAATGTTACGCCATGGGTTCTGTGTCAATGTTCGGAGCTATGGTTCTACTCAGATATTAAGAAAAG  
CTGCCTCTCAACCAATAGCCATTAATGACGTCAACTCAAAGATGCTTATTACAAAAAATGGGCCAGAAGCTGGA  
TGTTGATGGAAGCCTGAGGGATGGACCAAGCCAAACCATTTTTCTTCTATACCTGGTCCAAAACCTTACCGATA  
TTGGGGAATGTGTGGAGGTTCTTTCCAGGAATTGGCGAATATCATAATATTGAACTTGTAATTTGGTATAAAGGTA  
TGAAAGAAAAGTATGGCGATATCGTTTATTTTTCGGGCATACTGGAAAGAAACCATCAGTTCTGTGCTTTAATCC  
GGATGATACTGAAACAATATTTGAAATGAGGGGGCTGGCCGATAAGATATGGACTAAACTCTTACATCTATTAC  
CAACAGAAAATGCGACATGATTTTTCAAGGAATAGGTGGTGTGCTGTCTACCCAGGGCGAGAAGTGGTTTGAA  
AATAGATCTGTAGTCAACAAGATCTTGATGCAGCCACGTACAGTTGATTTATATGTGGACAGTATGGACAAGGTG  
GCTACAAGTTTTGATTGATTAATATTCGATATTTTTACGTAGCAGATCCTGATAATATGATTTCCAACGATTTTCAA  
AATGAAATATTTCAAATGGACAATGGAGTCGATGGCCCTTATAACTTACAACAAACGAATAGGCGTTTTGAATCGAA  
ACCTCCAAAAGGACTCTCAAGAGCAACGATTTATCAATAGCGTTCTGTCAATTATTTCGATTTATCTTATAAATTGGAT  
ATATTGCCATCGTTGTGGCCATACATATCAACACCCAACCTGGAGAAAATTCGTTAAAGCTATGGACTTTCTACCGA  
GTTGAATCAGAAAATATATCCAAGAATGTTGGATTTCGAGTGATCCAAGTATTCCGGACCACGAGAAAAGTGTGCTA  
GAGAACTGATCGAAAAGATCGTCGAATCGCCATAACCATGGTTAATGATATGATGATTGCTGGAATAGATACG  
ACTGGTAAAACCATAGCAGCTTTTTGTATTATCTTGCCAAAACCCCGACAAACAAGAAAAACTACGCCAAGAAC  
TGAAAACGTATCTACCGGAAAAAAGTAGCCCGGTGAATAAAGACCTTACAAGAGCGTCTCCTATTTGAAGGCTGT  
CATTAAAGGAAGCCATGCGACTATCACCTATAGCGATTGGAATCCTTCGGACCTCTGTCAAAGATATGGTACTGAAT  
GGTTATCAAATACCAAAGGTAAGTACTGAAGTAATTTCTATTAACATTTTACCGTCGAGAGACGACAAATATTTTCATGG  
ATGCCAACGAATTTATAACCAGAGAGATGGCTACGAAGTACTACAGATGAATATTCGTCCAAAACGTTTCATCCATT  
TGCTTCGTTTCCATTCGGTCTTGGACCACGGTCTTGTGTAGGCAAACGCTTGGCGAACATGGAGCTACAAGTTGGT  
GTAGCAAAGATAATAAGAACTTTTCAGTTCTCGTGGCCTCATCCTGATGCCCAATTCGGAGCAACCTTATTATAG  
GTATTCAAACA

> RferU34\_CYP314A1

CTGACAAAAGCGAGACAAAACGGTAGCATATTTAAAGTCGAGGTTACGTGCGGGATTAACCTGGGCTTGGAAAG  
CCACCTGTGCCCTGGTTCTCGGAAGACGTATGGGTTTTCTGATCGAAGACCGCGTCTGCCCCGTGCCCCAGAGGCT  
AGCGGACACCGTTAAGGTTAACTTCGCCGCTGTGGGACACGTAATTCGGCCTGCCGTTTTGGAAATGGTTCCCC  
ACCAGGTCCTACCGTCACCTGTGCGAGAGCGAGGCGGCTATCTACGAACTGGCGTCGGAACCTACATACGGACCGCC



GACGATTCCACAAAGGAGAGCGCCGTATTCCAGTCGGTTCTCAACGCCGACATCGACGAAAGAGAGAAGAAATCC  
GCCATAGTCGATTTTCTAGCCGCGGGCATCCACACCTTRAAGAACAGTCTCCTGTTCTCTGYTGTATCAAGTAGCTCT  
CAATCCGGAATGCCAAGAGAAAATCATTGAGGATGATTCAAAGGCTTACTTGAAGGCATGCTCCATGGAGACCTTC  
CGCATCACACCC

> RferU37\_CYP12V3

AAAAGAAGAAGTAGGTATCAACGCAGAGTACTTTTGTCTTTGTTCTGTTTCTATTTGCTTTGCGAGGCCGTAGAAA  
ATGGCCGGTAAAAACAATATTCTATCACGAAAAAGCGTTTGGTACCAATGCCGTAGCTATGTTTCCACACAGCCAT  
TTAAAAAAGCAGTTGCTGCGCAACAAGTTACTGTCAACGGTATCAACACTAAAGATATTTACTATAAGAAGATCGG  
CAATAAACTTGAAAACGATGACAAACCAGCTGGATGGAATGAGGCCAAAACCATTTTCCATGATACCAGGACCTAA  
ACCAATTCCAATTTTGGGAAATATATGGAGATTTTTTCCGGGCATTGGAGAATATCATAATTTAGGGATTGTGCGATT  
TGCATAAAAAATAACTGAAACCTATGGTGAAATAGCCTATTTTTCGGGTATATTTGGAAAGAAACCAATGGTATT  
TTGCTACAATCCCGATGCAATGGAAACGATTTCCAGGAACGAAGGTGCGTGGCCAGTTAGATACGGAATGAATGC  
CTTCGTTTATTATCAGAAAAATATACGTAAAGATGTGTTTCAAGGGATCGGTGGAGTTCTTTCTACACAAGGGGAG  
GAATGGTTCAAATTAGTTCGGCTGTGAATAAAATCCTGATGCAACCACGTACAGCTGAAATGTATGTGGGCAGT  
ATGGATAATGTGGCGAATACTCTGGTTGATAATTTTCGATATTTTTCAAGAGCAGATCCTGACAATCTAATGCCCA  
GTGATTTTCAAATGAATTTTAAATGGACAATGGAATCGATGGCAGTTATAGCGTATAATAACGAATTGGTGT  
TTAGATCGAAATTTGGATGTAACCTCAAACAACAACAGTTCATTAACCTCTGTATTAACAATGTTTCGATATGTCTT  
ACAAAATGGATGTCTTGCCGTCGTTATGGCCATATATTTCAACTCGAAATTGGAGGAAATTTGTGAACATCATGGA  
CACTCTCACAGAGTTAAATCAAAGTTTATCAAAGAATGTCTGGAATCGATCAATCCAGACTCAAACATTCCCAGCC  
ATGAGAGAAGTGTCTTGAGAGATTGCTTAAACAGATCGTCGAATTGCCATAACAATGACTAATGATATGCTCAT  
TGCGGGAATCGATACGACCGGTAAGACCATGGCTTCTGCTTTATATTTTCTCGCGAAAAATCCAGAAAAGCAAGAA  
AAACTACGACAAGAGCTGAAAACCTATTTACCAATAAAGAGAGTGTGGTTAATCAAGATATGATAAGGGCATCG  
CCTTATTTGAAGGCTGTTATCAAAGAAACCACAAGTTGGCACCTATAGCCATTGGAAATCTGCGGTCTACTGTGA  
AGGATTTAGTGTGAGTGGATATCAAATACCAAAGATACTGAAGTTGTCTCCATCAACATATTGTCGTCGATAGA  
TGACAAATATTTTCTTAAAGCTCAGGAATTCGTGCCGAAAGATGGCTTCGTAATACTACTGCGGATGAGTTTTCTATA  
AGAACGTTCAACCCCTTTGCTTCCGTTCCGTTTGGTTTCGGTCTAGATCATGTATAGGAAAGCGACTTGCAAATTTG  
GAACTGGAAGTTGGCTTAGCAAAAATGATAAGGAATTTTCAAATTTCTGGCCACATGCTGATGCTAAGTTCCGGTG  
CAACTTTATTGTATGGTATTCAATCTCCCTAAGATTCAAAGTTGTTGAAGTTGATAATTAATATCGAATTCTGATTT  
ATTTCTGTTAGTGTAGTTATTACTGGAGGACTTCGTTAATAGAAAATAAAGCCATGAAAACCTAAAATACACGGCAA  
TTGTCGTATAATTTATAACAATATTCAAAGTTATATAAAGAGTGGTTTGGTGAATCCTGTAATGTTAACAATCTTT  
ATGGAAGCGCTTAGTCATTATATAGTTACTTAGTGATTATACACTTTTTTTCGCAGAATTTAATAGGCTCAAGAACC  
AGAACCTGACTAATGGTCAGAAGCCAAATGTTTATATTTATATTAATATAGAAATATTTTCAACAAAAA  
GAAAAAACAACAAAAGTACTCTGCGTTGATACCACTGCTT

> RferU44\_CYP301A1

GTTCTAGGGCCAAAACCCATCCCGTTGCTTGGCAATACTTGGCGATTGCTACCCTTTATTGGACAATACGATATATC  
CGACGTTGCCAATTGTCACAATTATTCTACAAGGAATACGGAAAAATCGTAAAAACTTTCCGGTCTTGTGGAAG  
ACCCGATCTGTTGTTTATTTATGATGCAGATGAAATAGAAAAGATTTATAGAAATGAAGGACCGACTCCTTTCAGA  
CCTTCCATGCCATGTTTGGTCAAATATAAAAGTGAAGTTAGAAGAGATTTTTTGGGAAGAAGGTGGAGTAGTT  
GGAGTGCATGGGGAGCCTTGGAAAGACATTTAGAACCAAAGTACAAAAACCAATATTACAATTAATAAACTGTTAGG  
AAATATGTCGAACCTATCGAAGCTGTTACGAGCGATTTCTTAGCTAGGATGATCGAAATTAGAGATGAGAATCAA  
GAAATGCCGCGGATTTTGGACAATGAAATTCACAAATGGGCCTTGAATGTATAGGCAGAGTATCGCTGGATGTT  
AGATTAGGTTGTTTATAGATCCAAACTTAAAGCACGATTCGAAGCTTTAAAAATTATCGAGGCCGCAAAATACGCGT

TAAGGAACATCGCAATTTTGGAGTTGAGGTTTCCGTTTTGGAGATATTTCCCGACAACATTATGGACCAGATATGT  
CAAGAACATGGATTATTTTGTGCGAAATATGCATGAGACATATCGATGAGGCGATGGATCGTTTAAAACATAAAACT  
GTAAAAGACGAAAAGGATTTATCCTTGGTAGAGAGGATACTGGCGAGCGAACCCGACCCAAAACGGCTTATAAA  
CTGGCTTTAGATCTAATCTTAGTTGGAATCGATACAATCTCGATGGCGGTTTGTTCATATTGTATCAATTAGCAAT  
CAGACCAGAACAACAAGAAAAATGTATAGCAGAACTCGTCCGGATTTATGCCGGACCATAAACGAACCGTTGAC  
AGTTGAGAACTTAATCAGACTGACCTTTTTAAAAGGCATTTGTGAAAGAAGTCTTCAGGATGTAATCCACAGTAA  
TAGGAAATGGAAGAACCCTCCAAGAAGACACGGTACTTCTAGGATACCACGTACCCAAAGGGTTCAGGTAGTAT  
TTCCGACCTTGGTAACCGGCAGCATGAGCGAGTACGTTTCGAACCCAACTGAATTCCTTCCGGAGAGATGGATCAA  
ACAGGGATCCGGCCAGGACAAAATCCATCCATTTGCATCGTTGCCATATGGATATGGGGCGCGTATGTGTCTTGGT  
AGACGATTCGCTGATCTGAAAATACAAGTGTCTTAGCTAAATTGATCAGGTCTTACAACTGGAGTTCTACACG  
ACCCACTGGAATACAAGTCACTTTCATGTACGCCCCAGACGGTGAACCTTAAGTTTAAAGTAACAGAAAGACCCTA  
GAATTCCTTTCATACGAGAGGAGACTATTTTTACTCTGATAATTATTTTAAAGTATACGTTTTTTCACACGAAAAGGT  
ACTTATGTAAGATCGC

> RferU51\_CYP315A1

GTTTACGGTAATCCGACTTAGAAGTTGTTGAGTATTTAACAGTTTTGGAAATTCCTGTTTATGATGGCAACGATTCG  
AAGCAGCAGTTTCAACAGCATTACATAATGTGGCGAACTTAGTCGAACTATTACTAAACAATTATGTAAGAGAAAA  
CGAAGGACTGTTGGGGAAATTAAGAGGAAAAATGACAACAAACGAATTATCTCGTATCGTAACGGATCTTATATT  
GGCTGCCGGCGACACAACGGCGTATTCAATGGAATGGACTTTATATCTGAATTGGAAAAACCTAGACGTCCAAAA  
GAAACTCCGAGAACAATTGCAGAGGATGAAAAGAAGAGTCAGTGCTGGACCTTAACCTGTATTTAAAAAACAC  
TATTAAGGAATCTCTGCGATTATACCCAGTAGCTCCATTTTTAACTCGAATTCTACCGAAACCTGCAACGATCCAAG  
GATATTATATGCCGGCAGGTTCCGTTCTGATAATGTCGATTTTCTCGACAGGCCGAGATGCCATCAATTTCCGAAT  
CCACTAAAATTTGACCCCGACAGATGGATGAGAGACGATAACAATGGCGTCGCTGCCCGATCTGCATCTATACCGT  
TTGCAATAGGTTCTAGGTCTGTATAGGCAAGAACTAGCAGAAAAACAACCTCAAATAACTTTAGGTGAACCTGT  
GAGGAATTTTCATGTTACTGTGATAACTCGGAAGACGTTGACGTTATATTGGAAATGGTTGCCATACCGTCGGAG  
AAAATTAAGTTTCAATTTTCCAATTTGGAATAACTAGAAGATATTACGTACACCCGTATATTAAGAGAATATCCAAC  
ATATACGCCAATCCCTTGTATTTTCTACCAGTCAAGAAGTAATAATGTTACTATACGACAAAAAGGAAAGCTTCT  
AATATATTA AAAAGTAAATTATTTTTCGAGAATAC

> RferU32\_CYP315A1

GATGGATGGAACCTCCGTTACTCGATCACTTCCCGTAAATAGAAAAGGACGGATGCTGGCTCCAGTCTCTTTTACAA  
TCACCGAAAGTGAGTGCCAGTGTCCGTTCTAACAACATTACTGGAAATTATTGTGGGGGCGTCTCGATATCAGATG  
TACAGGATCGTTCATTACAAGGCAACAGTTCATTTCTCGACATGGATAACACGGATTTTCTTATTAAGCGGTAC  
AAAATTTAACAGTTACCAGACTTGGCAAGGTGAAATGTTCTGTATGAAATGTGTGGTGCGTTGTGTTAGGGCGGA  
TATATTACCCAGAGGTGGTGCTTTATCGAGAATAGCTAGACAATCAAGTACAACGGTAACGAAGACTATTGATGAT  
GTTCCAGGTCCTAAAGGGTGCCTCTTATCGGTAATACTATCCCTGTTGATGGCAGGTTCCACACCGAAACTTCA  
TCATTATATAGATAAAAAGACATTAAGAATACGGGTCTCATTTTTAAGGAAAGTATTCGGACCAGTGACCATGTAT  
ATTTATTAGTGATGCCAAAACCATCAGAGATGTGTTCCGCCACGAAGGAAAGTACCCTATCCATGTACTACCAGAA  
GCTTGGACTACCTATAACACTTTACATAATGTATCAAGAGGAATATTCTTCATGGACGGCGAGGAATGGTGGCATT  
TTCGTGCAATATTGAACGCAGCTCTGATGAAGGGCGACCAAGAATGGCTTGAAGATAGCTGCGTACCTGCCGTTG  
AAAATATTATGCGAAGAATTCGAACGGTTTCTAGTTGTACATCATCATATCCTGATATGGAGCAGATATTGTATTCC  
TGGTCAATTAGAGTAATAATATCGGTGCTAGTCCGACCACAGAATTATCTGTTAGCGAAAGATCAAATTGCCGATA  
GGGTCAGACTGAGTTGGCGTCAACGTTACGTCTATTTTTGAGACTAGTTCTAAGCTAATGTTGATTTCAAGTAAT  
TCGCTGCAAAATTCGGCATTTCGAAGTTCGGTATAAGATGGCAAACGATTTCGAAGCAGCAGTTTCAACAGCATTAC

ATAATGTGGCGAACTTAGTCGAACTATTACTAAACAATTATGTAAGAGAAAACGAAGGACTGTTGGGGAAATTA  
AGAGGAAAAATGACAACAAACGAATTATCTCGTATCGTAACGGATCTTATATTGGCTGCCGGCGACACAACGGCG  
TATACAATGGAATGGACTTAAAAGTATAGATTTCGAAAAACCTAGAGCAACGCAAAGAAACAGAACAAAAGAC  
AAAAGTACTCTGCGTTGATACCACTGCTT

> RferC12488\_CYP49A1

CAGAGATGCGCGACGGGGTTGTAGTATCTCGTAGTTGGCGGGGGGGCGCGTAGAATTCCGAAATGTCGCGCTTT  
GGTTGTGTTACAAAATGTTCTGTTCTCCTTACGGTCTCCGATCACGCTGTCTATAAAATTTGGCGCTGTAACCTCG  
CGCTATCATTCTCGTTTAAACAGGGGTGCCATAGAGAGGTAGTTGTTTTAGGAATTCTTGGATGCCGGTTTTATTTT  
GAATATATTAGTGTAAATATCCGGATTTCTTAGTCTCATCATGTCCGGCCACGTCCCCCTCAAAGCGATCCGCC  
TATTACAAAAGGCCACGCCCGTGCAGCAATCCACGCCCTCCAGATCCGGACCTACTCGACCTCGCTGACCAGAG  
TCCCAACCCCGAGGGCGGACGTTCTCCACGGCTGTCGACATCCTACCGGAGGACGCGTACGAGACCCTGTGGGA  
CGCGGACGACGTGTCGAACCGTACAGCGCCATCCCCGGACCTCGGGAGTTGCCATCATCGGGAATGCCTGGAG  
ATTGCCCCGATAATCGGTCAGTATAAGATCCAGGACCTGGATAAGGTCATGTGGTCGCTGTACGAGGACTACGG  
GCGTATAGTCAAGGTAGGCGGGTTGATCGGGCATCCGGATCTTTTGTTCGCTTCAACGGAGATGATATTCGAAA  
GGTGTTCGCTAGGGAAGAGGCGATGCCTCACCGTCCGTCCATGCCCTCACTGCATTACTACAAGCAGAACTGCAC  
AAGGGCTTTTTTACGGCAACGAAGGCGTTATCGGAGTGCACGGACCGAAGTGGGACGCCTTCAGGAAACAGGT  
ACAGCAGGTCCTGCTGCAGCCCGCAGCGCCAAAAAATACGTCGAACCTCTGGACGTCATCGCCGACGACTTTCTC  
GGCCTCATGGAGCACTCCCTGGACCACAACGACGAGCTGCCGACAATTCCTCTCCGAGATCTACAAGTGGGCCT  
TGGAATCCGTCGCCAGGGTGGCTCTGAACACCCGCTGGGATGCCTGGACGTCGAACTGCCGCGGAGTCCGAGT  
CCCAGAGGATCATCGACTCGATCAACACGTTCTTCTGGAACGTCGCCGAGGTCGAGCTCAAATGCCCGTGTGGA  
GGGTGTACCAGAACAAGGCGTTTCAAGAAATACATCGGGGCCTTGACGACTTCAAGACATTGTGCCTGAAGTACA  
TCATGCAGACCGTGGAGGCCATGCAGTACAAGAACTACGACCACGCCAAAGAGGAGGATATCTCGATAGTGGAG  
AGGATGCTACTGAAGACTGATAACCCTAACTGGCGGCCGTTCTGCCCCTGGACCTGCTGCTAGTGGGCGTCGAC  
ACGACGTCCATTGCTCTGGCGTCCACGGTGTATCAATTGAGTCAAACCCGGCCAAACAACAAAACACTGTTTCGAGG  
AACTGAGAAGAGCCATGCCAAGGCCGATTCCAAGATCGATGTAAGACCTTGAACAAGTACCGTATTTAAAAG  
CCTGTATCAAAGAACTTTAAGAATGTATCCTGTGATAATTGGTAACGGAAGATGTCTCCAATCTGACACAGTTCTC  
GCGGGATATCACGTGCCAAAGGGACTCACGTTATCTTCCCTCACTTAGTCGTAAGTAATATAGACGATTATTTCAA  
AGAACCAGAACGATTTGTGCCTGAACGGTGGGTAAAACACAACCTCCAGTTCGAAATGCCCTCATAATCAAGAAAA  
AGCGCACCTTTTCTGTGCTTCCGTTTGGATACGGGCGTCTTCTGCTTAGGGCGTGCATTGCCGAAATAGAG  
TTATATATCATGTTGGCCAAGATTTTTCAGGAAATATCAAGTAACTTCAACTACGGGCCTCTGACGTACAAGATTAC  
CCCCACTTACGTGCCGGAACAACCCCTAAAGTTTAACTAACCCTAGAACTGATTGATTACACTAACCAGAGTAT  
TATAAAAGAAATATATTTTTTTCTTTATAGCGTCGTG

> RferC10039\_CYP334E7

TGTTAACTCCCATTTAATTCCTATCATACCCCTATGTAATAAAAGTCGCTATAGCCTTGGCAAATTAATATGCCGAT  
TTGACATTTCCGTTATTGTCAAATAGTCAATGTTAAGTTGCGGCTTTGTTTAAAGTGTGTTTCTGTTAAAAATGTG  
GAGAATATCGAAAATACGAGCAAATGTGGTATTGGGAATTAGATATTGTGCCACCGAAGCCAAGTCCACCGCGTC  
TCAGATAACTACCCCTTGGTTGATGGTATTCCACCTCCAGCGACTGTCGTAAGAAAGGAAATACCAGTAGTGAAG  
AAAATTTTAAACGGAAGTTAAGAACAAGATGGTAGAAGCAAATTTATCGAAAAATTTTGCCTTTCGATGATGTAC  
CAGGTCCGAGGAGTCTAAAATTAATTTCAACATATGGAGTCACGTTCCCGCTTAAAGTAAGGAGTTTACTGCCGG  
AGCACTTTTTTCAGACTGATCGGATTTGGNNNNNNNNNNNNNNNNNNNGCTCAGTTGGGGCGGTAACGCAAGCT  
TTTTCCAAAATTTCTTTGACGTTTATGGTCCCGTGGTGAGACTGCACGGCCCTTTCGGTGGCGACGTCCTTCTTTTG  
TCCCGCCCTGAACATGCCAGTATTGTTTTCCGAAACGAAGGCACGCGGCCTGTCCGGGCTTGTGGATTCAAGTG

AAAAATATCGTCTGGAGCATCGAAGACTGAGACAGGCAGGTCCTTTCTTGATGTCGGGTTCTGCTTGGGAAAAGA  
TCCACGATTCCATCGATGATCCTATAAAGACTTCCGTAAATCGATACGCCAAACCAATGAACGAGATATGCGATGA  
GTTTCGTGAAACGCGTTCTGAATATTAGAACTTACAAGACGAGGTACCTAAGAACTTTAAGGACGAGATTTTAAAA  
TGGTGTCTGGAGAGTATGTGTGCCGTTACACTGAACAGAAAGTTTGGGTTTTTGGATACAACTGGTTTAAGTACCA  
CATCGGACCCTGGAAGGATTTTGGATGGAGTTAATGGTGCTACTGAAGCTATCAGGAAATGTGAGTTTGGTTTCC  
ATCTATGGAAATTTGTGGAGACACCGGCTTGGCGTTCTCTGGTGCGTAACTGCGACTCGATCGATTCCATTCTGAG  
TAAATACGTAGAACGAGCCCAGACCGCATTACGTGAAAGGAAAGATCTGAACCCAAAGACGGCGGATTTTCCGT  
AGTCGACCGTTTGTGCTCAACGAGGACGTTCTAATCGAAGATGCCATGACCGTCCTGCTGGACATGTTTCATCATC  
GGCGCCAACGCCACCGTGCCTGCGTCTTCTACTATATCACTTGGCGAAGGCTCCTAAGTGCCAAAAGAAGC  
TACAACAAGAAATCGACGGGCAGACCCGCACCGAACTCACCGCAGACGATCTGAAGCGCATGCCTTATCTGCAGG  
CCTGCATCAAGGAAAGCTTACGACTAGCGCCACCGATACCGATTTTGAATCGCGTACTCGCGCGAGATGCTATCAT  
CCACAAGTATTTGGTACCCGAAGGCACGTACGTCTAATCGCCACCCACTTGGCCAGCTTGCGCGAAGAGTATTTT  
GAAGATGCCCCGTCGCTTCCAGCCAGAACGTTGGCTCAACCAGGAAGTCGGTCGTCTCGCTCGCGATCTTCAGGAG  
TTTGCTCCATGCCCTTCGGTACGGTCCCCGAGCTTGCCAGGCGCGGAGCTTGCCGAGATGCAGGTGGGCTTGC  
TGGTGGCCAAGTCCTGAAGAGGTTAACATCGAATATAATTATGGGGAGATGTCTAGCTCAAATTTGATGCTCTC  
CAGCCCAACCAAACAGATCGGAAGAGCG
